# Supplementary material for: A consensus conceptual model of meaningful symptoms and functional impacts in early Parkinson’s Disease
Source: Research Square preprint supplement (doi:10.21203/rs.3.rs-4377805/v1), 2024-07-03
Supplement: Supplementary file 1 [file 679edd50c2df6eddc4bc54ae.xlsx]

## Sheet: SUMMARY TAB FOR <3 YR
Refer to footnotes		Strength of Evidence (SOE) Artifical score Higher score and darker color indicates greater evidence and/or higher prevalence in early PD (see footnotes)	Mean percent (%) of participants reporting COI is bothersome in early stage PD (Tier 1A)	Mean prevalence (%) across unique samples (% ALL TIERS)	Mean prevalence in Tier 1B samples	Mean prevalence in Tier 2 samples	Mean prevalence in Tier 3 samples	# Unique Sample Studies reporting on symptom	# Unique Tier 1	# Unique Tier 2	# Unique Tier 3	# Unique sample studies disconfirming	# Disconfirming Tier 1	# Disconfirming Tier 2	# Disconfirming Tier 3	Actual number of unique sources confirming	% of Tier 1A/B Sources indicating symptom is Present in early PD	Tier 1 - All (#/N unique sample studies)	% of Tier 1A Sources indicating symptom is Bothersome in early PD	Tier 1A (#/3 unique sample studies)	% of Tier 2 Sources reporting symptom is present	Tier 2 (#/N)	% of Tier 3 Sources reporting symptom is Present	Tier 3 (#/N)	Percent agreement across all sources measuring concept	% agreement Tier 1	% agreement Tier 2	% agreement Tier 3
SYMPTOMS
MOVEMENT DOMAIN								20									1	6			0.538462	7	0.210526	4
SLOW MOVEMENTS								9									1	6			0	0	0.157895	3
Slow movement (Bradykinesia)		430.4	0.285833	53.8	46.5	#DIV/0!	83	9	6	0	3	1	0	0	1	8	1	6	1	3	0	0	0.105263	2	0.888889	1	#DIV/0!	0.666667
FINE MOTOR								6									0.833333	5			0	0	0.0526316	1
Fine motor/dexterity		508	0.350167	84.6667	84.6667	#DIV/0!	#DIV/0!	6	5	0	1	0	0	0	0	6	0.833333	5	1	3	0	0	0.0526316	1	1	1	#DIV/0!	1
LOSS OF COORDINATION								3									0.5	3			0	0	0	0
Loss of coordination		42	0.1025	14	14	#DIV/0!	#DIV/0!	3	3	0	0	0	0	0	0	3	0.5	3	0.333333	1	0	0	0	0	1	1	#DIV/0!	#DIV/0!
STIFFNESS								10									1	6			0.0769231	1	0.0526316	1
Stiffness/Rigidity/Tightness		492.8	0.241667	61.6	58	#DIV/0!	76	8	6	0	2	0	0	0	0	8	1	6	1	3	0	0	0.105263	2	1	1	#DIV/0!	1
Decreased ROM		33	0.13	16.5	16.5	#DIV/0!	#DIV/0!	2	2	0	0	0	0	0	0	2	0.333333	2	0.333333	1	0	0	0	0	1	1	#DIV/0!	#DIV/0!
Flat affect/Facial expression/movements/masked face		108	0.0285	18	18	#DIV/0!	#DIV/0!	6	6	0	0	0	0	0	0	6	1	6	1	3	0	0	0	0	1	1	#DIV/0!	#DIV/0!
Oculomotor changes (incl. blinking, pupilomotor)		55.5	#DIV/0!	18.5	3	34	#DIV/0!	3	1	1	1	0	0	0	0	3	0.166667	1	0	0	0.0769231	1	0.0526316	1	1	1	1	1
WALKING, BALANCE, & POSTURE								12									1	6			0.153846	2	0.0526316	1
Walking & Balance (measured as composite)		340.32	0.2075	56.72	62.6667	47.8	#DIV/0!	6	4	2	0	0	0	0	0	6	0.666667	4	0.666667	2	0.153846	2	0	0	1	1	1	#DIV/0!
Altered balance
Balance & postural instability		329.6	0.1985	41.2	49.75	#DIV/0!	7	8	6	0	2	0	0	0	0	8	1	6	1	3	0	0	0.105263	2	1	1	#DIV/0!	1
Gait changes								10									1	6			0.0769231	1	0.0526316	1
Gait changes		502	0.323	62.75	62.75	#DIV/0!	#DIV/0!	8	6	0	2	0	0	0	0	8	1	6	0.666667	2	0	0	0.105263	2	1	1	#DIV/0!	1
Shuffling		11	#DIV/0!	11	11	#DIV/0!	#DIV/0!	1	1	0	0	0	0	0	0	1	0.166667	1	0	0	0	0	0	0	1	1	#DIV/0!	#DIV/0!
Dragging feet		24	#DIV/0!	24	24	#DIV/0!	#DIV/0!	1	1	0	0	0	0	0	0	1	0.166667	1	0	0	0	0	0	0	1	1	#DIV/0!	#DIV/0!
Short step		3	#DIV/0!	3	3	#DIV/0!	#DIV/0!	1	1	0	0	0	0	0	0	1	0.166667	1	0	0	0	0	0	0	1	1	#DIV/0!	#DIV/0!
Altered stance		#DIV/0!	#DIV/0!	#DIV/0!	#DIV/0!	#DIV/0!	#DIV/0!	0	0	0	0	0	0	0	0	0	0	0	0	0	0	0	0	0	#DIV/0!	#DIV/0!	#DIV/0!	#DIV/0!
Altered turning		5	#DIV/0!	5	5	#DIV/0!	#DIV/0!	1	1	0	0	0	0	0	0	1	0.166667	1	0	0	0	0	0	0	1	1	#DIV/0!	#DIV/0!
Double support time		#DIV/0!	#DIV/0!	#DIV/0!	#DIV/0!	#DIV/0!	#DIV/0!	0	0	0	0	0	0	0	0	0	0	0	0	0	0	0	0	0	#DIV/0!	#DIV/0!	#DIV/0!	#DIV/0!
Staggering		#DIV/0!	#DIV/0!	#DIV/0!	#DIV/0!	#DIV/0!	#DIV/0!	0	0	0	0	0	0	0	0	0	0	0	0	0	0	0	0	0	#DIV/0!	#DIV/0!	#DIV/0!	#DIV/0!
Freezing		29	0.02625	5.8	8	3.6	#DIV/0!	5	3	1	1	0	0	0	0	5	0.5	3	0.666667	2	0.0769231	1	0.0526316	1	1	1	1	1
Slow velocity		#DIV/0!	#DIV/0!	#DIV/0!	#DIV/0!	#DIV/0!	#DIV/0!	0	0	0	0	0	0	0	0	0	0	0	0	0	0	0	0	0	#DIV/0!	#DIV/0!	#DIV/0!	#DIV/0!
Increased velocity		#DIV/0!	#DIV/0!	#DIV/0!	#DIV/0!	#DIV/0!	#DIV/0!	0	0	0	0	0	0	0	0	0	0	0	0	0	0	0	0	0	#DIV/0!	#DIV/0!	#DIV/0!	#DIV/0!
Altered arm swing
Motor - Altered arm swing		163.5	0.05	54.5	54.5	#DIV/0!	#DIV/0!	3	3	0	0	0	0	0	0	3	0.5	3	0.666667	2	0	0	0	0	1	1	#DIV/0!	#DIV/0!
Posture changes
Postural changes / stooped		87	0.0381667	14.5	14.5	#DIV/0!	#DIV/0!	6	6	0	0	0	0	0	0	6	1	6	1	3	0	0	0	0	1	1	#DIV/0!	#DIV/0!
TREMOR								10									1	6			0.153846	2	0	0
Tremor		845.571	0.571	84.5571	93.25	70.45	78	10	6	2	2	0	0	0	0	10	1	6	1	3	0.153846	2	0.105263	2	1	1	1	1
Internal tremor		25.5	0.0075	8.5	8.5	#DIV/0!	#DIV/0!	3	3	0	0	0	0	0	0	3	0.5	3	0.333333	1	0	0	0	0	1	1	#DIV/0!	#DIV/0!
INVOLUNTARY MOVEMENT								12									1	6			0.384615	5	0.0526316	1
Twitching		30	#DIV/0!	30	30	#DIV/0!	#DIV/0!	1	1	0	0	0	0	0	0	1	0.166667	1	0	0	0	0	0	0	1	1	#DIV/0!	#DIV/0!
Dystonia, cramping, spasms		148.333	0.0934667	29.6667	29.6667	#DIV/0!	#DIV/0!	5	5	0	0	0	0	0	0	5	0.833333	5	1	3	0	0	0	0	1	1	#DIV/0!	#DIV/0!
Dykinesia		55	0.0225	11	15.5	2	#DIV/0!	8	5	2	1	3	1	1	1	5	0.666667	4	0.666667	2	0.0769231	1	0	0	0.625	0.8	0.5	0
Restless leg		90.65	0.011	12.95	11	13.6	#DIV/0!	8	4	4	0	1	1	0	0	7	0.5	3	0.666667	2	0.307692	4	0	0	0.875	0.75	1	#DIV/0!
COGNITIVE DOMAIN								15									1	6			0.384615	5	0.0526316	1
Cognitive changes/MCI		300	0.08065	30	#DIV/0!	25	35	10	2	2	6	0	0	0	0	10	0.333333	2	0.666667	2	0.153846	2	0.315789	6	1	1	1	1
Dementia		#DIV/0!	#DIV/0!	#DIV/0!	#DIV/0!	#DIV/0!	#DIV/0!	2	1	1	0	1	0	1	0	1	0	1	0	1	0	0	0	0	0.5	1	0	#DIV/0!
MEMORY								13									1	6			0.384615	5	0	0
Memory		420.75	0.144667	38.25	51	25.5	#DIV/0!	11	6	4	1	0	0	0	0	11	1	6	1	3	0.307692	4	0.0526316	1	1	1	1	1
Forgetting to do things		#DIV/0!	#DIV/0!	#DIV/0!	#DIV/0!	#DIV/0!	#DIV/0!	1	0	1	0	0	0	0	0	1	0	0	0	0	0.0769231	1	0	0	1	#DIV/0!	1	#DIV/0!
Visual memory		#DIV/0!	#DIV/0!	#DIV/0!	#DIV/0!	#DIV/0!	#DIV/0!	1	0	0	1	0	0	0	0	1	0	0	0	0	0	0	0.0526316	1	1	#DIV/0!	#DIV/0!	1
EXECUTIVE FUNCTION								5									0.5	3			0	0	0.0526316	1
Executive function		120	0.0265	24	24	#DIV/0!	#DIV/0!	5	3	0	2	0	0	0	0	5	0.5	3	0.666667	2	0	0	0.105263	2	1	1	#DIV/0!	1
Ability to multitask/disorganized		28	0.032	14	14	#DIV/0!	#DIV/0!	2	2	0	0	0	0	0	0	2	0.333333	2	0.333333	1	0	0	0	0	1	1	#DIV/0!	#DIV/0!
LANGUAGE
Word finding/language		210	0.1715	42	42	#DIV/0!	#DIV/0!	6	6	0	0	1	1	0	0	5	0.833333	5	1	3	0	0	0	0	0.833333	0.833333	#DIV/0!	#DIV/0!
VISUAL SPATIAL								6									0.666667	4			0	0	0.0526316	1
Visual spatial/Depth perception		75	0.03	25	25	#DIV/0!	#DIV/0!	4	2	0	2	1	1	0	0	3	0.166667	1	0.666667	2	0	0	0.105263	2	0.75	0.5	#DIV/0!	1
Difficulty finding way		20	0.0373	10	10	#DIV/0!	#DIV/0!	2	2	0	0	0	0	0	0	2	0.333333	2	0.333333	1	0	0	0	0	1	1	#DIV/0!	#DIV/0!
ATTENTION & PROCESSING								9									1	6			0.230769	3	0	0
Cognitive - Attention		73.5	0.114	24.5	24.5	#DIV/0!	#DIV/0!	3	3	0	0	0	0	0	0	3	0.5	3	0.333333	1	0	0	0	0	1	1	#DIV/0!	#DIV/0!
Cognitive - Concentrating		254.057	0.109333	28.2286	36.5	17.2	#DIV/0!	9	6	3	0	0	0	0	0	9	1	6	1	3	0.230769	3	0	0	1	1	1	#DIV/0!
Cognitive - slower thinking		166	0.116	41.5	41.5	#DIV/0!	#DIV/0!	4	4	0	0	0	0	0	0	4	0.666667	4	1	3	0	0	0	0	1	1	#DIV/0!	#DIV/0!
Cognitive - Mental alertness/fog		96	0.0475	24	24	#DIV/0!	#DIV/0!	4	4	0	0	0	0	0	0	4	0.666667	4	0.666667	2	0	0	0	0	1	1	#DIV/0!	#DIV/0!
PSYCHIATRIC DOMAIN								26									1	6			0.692308	9	0.421053	8
Neuropsychiatric symptoms (NOS)		#DIV/0!	#DIV/0!	#DIV/0!	#DIV/0!	#DIV/0!	#DIV/0!	1	0	1	0	0	0	0	0	1	0	0	0	0	0.0769231	1	0	0	1	#DIV/0!	1	#DIV/0!
MOOD & AFFECT								24									1	6			0.615385	8	0.368421	7
Neuropsych - Mood changes		188	0.254	47	47	#DIV/0!	#DIV/0!	4	3	0	1	0	0	0	0	4	0.5	3	0.666667	2	0	0	0.0526316	1	1	1	#DIV/0!	1
APATHY
Apathy		302.64	0.0543333	23.28	12.3333	23.02	40.35	14	5	6	3	1	0	0	1	13	0.833333	5	1	3	0.461538	6	0.105263	2	0.928571	1	1	0.666667
Loss of interest		96	#DIV/0!	24	32.5	15.5	#DIV/0!	4	2	2	0	0	0	0	0	4	0.333333	2	0	0	0.153846	2	0	0	1	1	1	#DIV/0!
ANXIOUS MOOD								15									1	6			0.384615	5	0.157895	3
Anxiety		634.725	0.21	45.3375	56.25	40.61	38.6667	15	6	5	4	1	0	0	1	14	1	6	1	3	0.384615	5	0.157895	3	0.933333	1	1	0.75
Social phobia		#DIV/0!	#DIV/0!	#DIV/0!	#DIV/0!	#DIV/0!	#DIV/0!	0	0	0	0	0	0	0	0	0	0	0	0	0	0	0	0	0	#DIV/0!	#DIV/0!	#DIV/0!	#DIV/0!
Panic		14	#DIV/0!	14	14	#DIV/0!	#DIV/0!	1	1	0	0	0	0	0	0	1	0.166667	1	0	0	0	0	0	0	1	1	#DIV/0!	#DIV/0!
DEPRESSED MOOD								21									1	6			0.461538	6	0.315789	6
DIAGNOSTIC CLASSIFICATION - Seasonal affective disorder		29	#DIV/0!	29	#DIV/0!	#DIV/0!	29	1	0	0	1	0	0	0	0	1	0	0	0	0	0	0	0.0526316	1	1	#DIV/0!	#DIV/0!	1
DIAGNOSTIC CLASSIFICATION: Depression		652.989	0.077	34.3679	38.3333	26.63	38.8333	19	6	5	9	0	0	0	0	19	1	6	1	3	0.384615	5	0.473684	9	1	1	1	1
low or flat mood		80.6	#DIV/0!	26.8667	24.5	31.6	#DIV/0!	3	2	1	0	0	0	0	0	3	0.333333	2	0	0	0.0769231	1	0	0	1	1	1	#DIV/0!
Feeling of sadness		#DIV/0!	#DIV/0!	#DIV/0!	#DIV/0!	#DIV/0!	#DIV/0!	0	0	0	0	0	0	0	0	0	0	0	0	0	0	0	0	0	#DIV/0!	#DIV/0!	#DIV/0!	#DIV/0!
Loss of pleasure		30	#DIV/0!	30	30	#DIV/0!	#DIV/0!	1	1	0	0	0	0	0	0	1	0.166667	1	0	0	0	0	0	0	1	1	#DIV/0!	#DIV/0!
Negative feelings & emotions		60	0.273	30	30	#DIV/0!	#DIV/0!	2	2	0	0	0	0	0	0	2	0.333333	2	0.333333	1	0	0	0	0	1	1	#DIV/0!	#DIV/0!
Death & suicidal thoughts		6	0.008	3	3	#DIV/0!	#DIV/0!	2	2	0	0	0	0	0	0	2	0.333333	2	0.333333	1	0	0	0	0	1	1	#DIV/0!	#DIV/0!
EMOTIONAL LABILITY								4									0.333333	2			0.0769231	1	0.0526316	1
Pseudobulbar affect		#DIV/0!	#DIV/0!	#DIV/0!	#DIV/0!	#DIV/0!	#DIV/0!	1	1	0	0	1	1	0	0	0	0	0	0.333333	1	0	0	0	0	0	0	#DIV/0!	#DIV/0!
Irritability		40.5	0.01	13.5	#DIV/0!	18	9	3	1	1	1	0	0	0	0	3	0.166667	1	0.333333	1	0.0769231	1	0.0526316	1	1	1	1	1
Euphoria		1	#DIV/0!	1	#DIV/0!	1	#DIV/0!	2	0	1	1	1	0	0	1	1	0	0	0	0	0.0769231	1	0	0	0.5	#DIV/0!	1	0
Agitation		25	#DIV/0!	12.5	#DIV/0!	12	13	2	0	1	1	0	0	0	0	2	0	0	0	0	0.0769231	1	0.0526316	1	1	#DIV/0!	1	1
BEHAVIORS								3					1				0	1			0.0769231	1	0.0526316	1
Impulsive behaviors		10	#DIV/0!	10	#DIV/0!	10	#DIV/0!	2	1	1	0	1	1	0	0	1	0	0	0.333333	1	0.0769231	1	0	0	0.5	0	1	#DIV/0!
Medication use compulsion		2	#DIV/0!	2	#DIV/0!	2	#DIV/0!	1	0	1	0	0	0	0	0	1	0	0	0	0	0.0769231	1	0	0	1	#DIV/0!	1	#DIV/0!
Buying compulsion		4	#DIV/0!	4	#DIV/0!	4	#DIV/0!	1	0	1	0	0	0	0	0	1	0	0	0	0	0.0769231	1	0	0	1	#DIV/0!	1	#DIV/0!
Eating compulsion		5	#DIV/0!	5	#DIV/0!	5	#DIV/0!	1	0	1	0	0	0	0	0	1	0	0	0	0	0.0769231	1	0	0	1	#DIV/0!	1	#DIV/0!
Sexual compulsion		5	#DIV/0!	5	#DIV/0!	5	#DIV/0!	1	0	1	0	0	0	0	0	1	0	0	0	0	0.0769231	1	0	0	1	#DIV/0!	1	#DIV/0!
Punding compulsion		5	#DIV/0!	5	#DIV/0!	5	#DIV/0!	1	0	1	0	0	0	0	0	1	0	0	0	0	0.0769231	1	0	0	1	#DIV/0!	1	#DIV/0!
Gambling compulsion		1	#DIV/0!	1	#DIV/0!	1	#DIV/0!	1	0	1	0	0	0	0	0	1	0	0	0	0	0.0769231	1	0	0	1	#DIV/0!	1	#DIV/0!
Walkabout compulsion		1	#DIV/0!	1	#DIV/0!	1	#DIV/0!	1	0	1	0	0	0	0	0	1	0	0	0	0	0.0769231	1	0	0	1	#DIV/0!	1	#DIV/0!
Hobbyism compulsion		11	#DIV/0!	11	#DIV/0!	11	#DIV/0!	1	0	1	0	0	0	0	0	1	0	0	0	0	0.0769231	1	0	0	1	#DIV/0!	1	#DIV/0!
DIAGNOSTIC CLASSIFICATION - subsyndromal ICD		50	#DIV/0!	25	#DIV/0!	33	17	2	0	1	1	0	0	0	0	2	0	0	0	0	0.0769231	1	0.0526316	1	1	#DIV/0!	1	1
DIAGNOSTIC CLASSIFICATION - ICD		10	#DIV/0!	10	#DIV/0!	10	#DIV/0!	1	0	1	0	0	0	0	0	1	0	0	0	0	0.0769231	1	0	0	1	#DIV/0!	1	#DIV/0!
PSYCHOSIS								7									0.333333	2			0.307692	4	0.0526316	1
Psychosis		#DIV/0!	#DIV/0!	#DIV/0!	#DIV/0!	#DIV/0!	#DIV/0!	0	0	0	0	0	0	0	0	0	0	0	0	0	0	0	0	0	#DIV/0!	#DIV/0!	#DIV/0!	#DIV/0!
Delusions		4	#DIV/0!	2	#DIV/0!	2	#DIV/0!	6	1	4	1	4	1	2	1	2	0	0	0.333333	1	0.153846	2	0	0	0.333333	0	0.5	0
Hallucinations		17.2667	0.005	4.31667	#DIV/0!	4.31667	#DIV/0!	7	2	4	1	3	1	1	1	4	0.166667	1	0.666667	2	0.230769	3	0	0	0.571429	0.5	0.75	0
Smell hallucination		15	#DIV/0!	15	15	#DIV/0!	#DIV/0!	1	1	0	0	0	0	0	0	1	0.166667	1	0	0	0	0	0	0	1	1	#DIV/0!	#DIV/0!
PERSONALITY CHANGES								4									0.166667	1			0.0769231	1	0.105263	2
Personality changes		#DIV/0!	0.01	#DIV/0!	#DIV/0!	#DIV/0!	#DIV/0!	1	1	0	0	0	0	0	0	1	0.166667	1	0.333333	1	0	0	0	0	1	1	#DIV/0!	#DIV/0!
Persistence		#DIV/0!	#DIV/0!	#DIV/0!	#DIV/0!	#DIV/0!	#DIV/0!	0	0	0	0	0	0	0	0	0	0	0	0	0	0	0	0	0	#DIV/0!	#DIV/0!	#DIV/0!	#DIV/0!
Reward dependence		#DIV/0!	#DIV/0!	#DIV/0!	#DIV/0!	#DIV/0!	#DIV/0!	0	0	0	0	0	0	0	0	0	0	0	0	0	0	0	0	0	#DIV/0!	#DIV/0!	#DIV/0!	#DIV/0!
Disinhibition		2	#DIV/0!	2	#DIV/0!	2	#DIV/0!	2	0	1	1	1	0	0	1	1	0	0	0	0	0.0769231	1	0	0	0.5	#DIV/0!	1	0
Neuroticism		#DIV/0!	#DIV/0!	#DIV/0!	#DIV/0!	#DIV/0!	#DIV/0!	0	0	0	0	0	0	0	0	0	0	0	0	0	0	0	0	0	#DIV/0!	#DIV/0!	#DIV/0!	#DIV/0!
Emotion recognition accuracy		#DIV/0!	#DIV/0!	#DIV/0!	#DIV/0!	#DIV/0!	#DIV/0!	1	0	0	1	0	0	0	0	1	0	0	0	0	0	0	0.0526316	1	1	#DIV/0!	#DIV/0!	1
Low novelty seeking		#DIV/0!	#DIV/0!	#DIV/0!	#DIV/0!	#DIV/0!	#DIV/0!	0	0	0	0	0	0	0	0	0	0	0	0	0	0	0	0	0	#DIV/0!	#DIV/0!	#DIV/0!	#DIV/0!
SENSORY DOMAIN								21									1	6			0.692308	9	0.210526	4
Sensory changes NOS		#DIV/0!	#DIV/0!	#DIV/0!	#DIV/0!	#DIV/0!	#DIV/0!	1	0	0	1	1	0	0	1	0	0	0	0	0	0	0	0	0	0	#DIV/0!	#DIV/0!	0
FIVE SENSES								17									1	6			0.461538	6	0.210526	4
VISION								11									0.833333	5			0.461538	6	0	0
Vision		34.6667	0.008	8.66667	8.66667	#DIV/0!	#DIV/0!	4	4	0	0	0	0	0	0	4	0.666667	4	0.333333	1	0	0	0	0	1	1	#DIV/0!	#DIV/0!
Diplopia		19.1	#DIV/0!	4.775	3	5.36667	#DIV/0!	5	2	3	0	1	1	0	0	4	0.166667	1	0.333333	1	0.230769	3	0	0	0.8	0.5	1	#DIV/0!
Light sensitivity		62.4	#DIV/0!	20.8	#DIV/0!	20.8	#DIV/0!	3	0	3	0	0	0	0	0	3	0	0	0	0	0.230769	3	0	0	1	#DIV/0!	1	#DIV/0!
Dry eyes		3	#DIV/0!	3	3	#DIV/0!	#DIV/0!	1	1	0	0	0	0	0	0	1	0.166667	1	0	0	0	0	0	0	1	1	#DIV/0!	#DIV/0!
TASTE
Taste		50	0.008	25	#DIV/0!	25	#DIV/0!	2	1	1	0	0	0	0	0	2	0.166667	1	0.333333	1	0.0769231	1	0	0	1	1	1	#DIV/0!
SMELL								13									0.833333	5			0.307692	4	0.157895	3
Smell		377.371	0.023	29.0286	30.5	27.0667	#DIV/0!	13	5	4	4	0	0	0	0	13	0.833333	5	0.666667	2	0.307692	4	0.210526	4	1	1	1	1
HEARING
Hearing		5	#DIV/0!	5	5	#DIV/0!	#DIV/0!	1	1	0	0	0	0	0	0	1	0.166667	1	0	0	0	0	0	0	1	1	#DIV/0!	#DIV/0!
TOUCH								7									1	6			0	0	0.0526316	1
Touch sensation		48	0.02	16	16	#DIV/0!	#DIV/0!	3	3	0	0	0	0	0	0	3	0.5	3	0.666667	2	0	0	0	0	1	1	#DIV/0!	#DIV/0!
Peripheral neuropathy		53	#DIV/0!	26.5	15	#DIV/0!	38	2	1	0	1	0	0	0	0	2	0.166667	1	0	0	0	0	0.0526316	1	1	1	#DIV/0!	1
Vibratory sense*		55	#DIV/0!	55	#DIV/0!	#DIV/0!	55	1	0	0	1	0	0	0	0	1	0	0	0	0	0	0	0.0526316	1	1	#DIV/0!	#DIV/0!	1
Numbness		29	0.03	14.5	14.5	#DIV/0!	#DIV/0!	2	2	0	0	0	0	0	0	2	0.333333	2	0.333333	1	0	0	0	0	1	1	#DIV/0!	#DIV/0!
Tingling		26	#DIV/0!	13	13	#DIV/0!	#DIV/0!	2	2	0	0	0	0	0	0	2	0.333333	2	0	0	0	0	0	0	1	1	#DIV/0!	#DIV/0!
Temperature sensation		#DIV/0!	0.03	#DIV/0!	#DIV/0!	#DIV/0!	#DIV/0!	1	1	0	0	1	1	0	0	0	0	0	0.666667	2	0	0	0	0	0	0	#DIV/0!	#DIV/0!
OTHER SENSATIONS								17									1	6			0.692308	9	0	0
PAIN								11									1	6			0.384615	5	0	0
Pain		418.244	0.283317	38.0222	44	33.24	#DIV/0!	11	6	5	0	0	0	0	0	11	1	6	1	3	0.384615	5	0	0	1	1	1	#DIV/0!
Headache		#DIV/0!	0.009	#DIV/0!	#DIV/0!	#DIV/0!	#DIV/0!	1	1	0	0	0	0	0	0	1	0.166667	1	0.333333	1	0	0	0	0	1	1	#DIV/0!	#DIV/0!
FATIGUE AND LACK OF ENERGY								12									1	6			0.307692	4	0	0
Fatigue (general)		546.578	0.278583	49.6889	61	38.3	50	12	6	4	2	1	0	0	1	11	1	6	1	3	0.307692	4	0.0526316	1	0.916667	1	1	0.5
Fatigue - Mental		24	0.0121	8	8	#DIV/0!	#DIV/0!	3	3	0	0	0	0	0	0	3	0.5	3	0.666667	2	0	0	0	0	1	1	#DIV/0!	#DIV/0!
Fatigue - Physical		70	0.334	35	35	#DIV/0!	#DIV/0!	2	2	0	0	0	0	0	0	2	0.333333	2	0.333333	1	0	0	0	0	1	1	#DIV/0!	#DIV/0!
BREATHLESSNESS
Dyspnea		#DIV/0!	#DIV/0!	#DIV/0!	#DIV/0!	#DIV/0!	#DIV/0!	1	1	0	0	1	1	0	0	0	0	0	0.333333	1	0	0	0	0	0	0	#DIV/0!	#DIV/0!
WEAKNESS								4									0.666667	4			0	0	0	0
Muscle weakness		81.3333	0.0443	20.3333	20.3333	#DIV/0!	#DIV/0!	4	4	0	0	0	0	0	0	4	0.666667	4	0.666667	2	0	0	0	0	1	1	#DIV/0!	#DIV/0!
Heaviness		5	#DIV/0!	5	5	#DIV/0!	#DIV/0!	1	1	0	0	0	0	0	0	1	0.166667	1	0	0	0	0	0	0	1	1	#DIV/0!	#DIV/0!
TEMPERATURE CONTROL								7									0.666667	4			0.230769	3	0	0
Thermoregulation		98.6667	0.016	24.6667	8.5	57	#DIV/0!	5	4	1	0	1	1	0	0	4	0.5	3	0.333333	1	0.0769231	1	0	0	0.8	0.75	1	#DIV/0!
Heat intolerance		57.1	#DIV/0!	19.0333	#DIV/0!	19.0333	#DIV/0!	3	0	3	0	0	0	0	0	3	0	0	0	0	0.230769	3	0	0	1	#DIV/0!	1	#DIV/0!
Cold intolerance		81.8	#DIV/0!	27.2667	#DIV/0!	27.2667	#DIV/0!	3	0	3	0	0	0	0	0	3	0	0	0	0	0.230769	3	0	0	1	#DIV/0!	1	#DIV/0!
SLEEP DOMAIN								21									1	6			0.615385	8	0.210526	4
Altered sleep (NOS)		249.429	0.1781	27.7143	23	23.6667	54	10	4	3	3	1	0	0	1	9	0.666667	4	0.666667	2	0.230769	3	0.105263	2	0.9	1	1	0.666667
SLEEP DISTURBANCES								21									1	6			0.615385	8	0.210526	4
Sleep disturbances (NOS)		418.667	0.1345	52.3333	52	52.5	53	9	5	2	2	1	0	0	1	8	0.833333	5	0.666667	2	0.153846	2	0.0526316	1	0.888889	1	1	0.5
SLEEP QUALITY
Sleep Quality		16	#DIV/0!	16	16	#DIV/0!	#DIV/0!	1	1	0	0	0	0	0	0	1	0.166667	1	0	0	0	0	0	0	1	1	#DIV/0!	#DIV/0!
INSOMNIA (FALLING AND STAYING ASLEEP)								11									0.833333	5			0.384615	5	0.0526316	1
Insomnia		205.425	0.22	22.825	21.5	24.15	#DIV/0!	9	4	5	0	0	0	0	0	9	0.666667	4	0.333333	1	0.384615	5	0	0	1	1	1	#DIV/0!
Trouble falling asleep		#DIV/0!	0.019	#DIV/0!	#DIV/0!	#DIV/0!	#DIV/0!	1	1	0	0	0	0	0	0	1	0.166667	1	0.333333	1	0	0	0	0	1	1	#DIV/0!	#DIV/0!
Trouble staying asleep		82	0.065	41	41	#DIV/0!	#DIV/0!	2	2	0	0	0	0	0	0	2	0.333333	2	0.333333	1	0	0	0	0	1	1	#DIV/0!	#DIV/0!
Early morning awaking		#DIV/0!	#DIV/0!	#DIV/0!	#DIV/0!	#DIV/0!	#DIV/0!	1	1	0	0	1	1	0	0	0	0	0	0.333333	1	0	0	0	0	0	0	#DIV/0!	#DIV/0!
Sleep duration & efficiency		#DIV/0!	#DIV/0!	#DIV/0!	#DIV/0!	#DIV/0!	#DIV/0!	1	0	0	1	1	0	0	1	0	0	0	0	0	0	0	0	0	0	#DIV/0!	#DIV/0!	0
SLEEP WALKING
Sleep walking/parasomnia		5	#DIV/0!	5	5	#DIV/0!	#DIV/0!	2	2	0	0	1	1	0	0	1	0.166667	1	0.333333	1	0	0	0	0	0.5	0.5	#DIV/0!	#DIV/0!
RSBD								17									1	6			0.384615	5	0.26	4
RSBD		459.36	0.0513333	28.71	30.25	30.55	21.95	16	6	5	5	0	0	0	0	16	1	6	1	3	0.384615	5	0.263158	5	1	1	1	1
Vivid dreams		138.04	0.07	19.72	29	13.5333	#DIV/0!	7	3	4	0	0	0	0	0	7	0.5	3	0.666667	2	0.307692	4	0	0	1	1	1	#DIV/0!
Unpleasant dreams		14	#DIV/0!	14	14	#DIV/0!	#DIV/0!	1	1	0	0	0	0	0	0	1	0.166667	1	0	0	0	0	0	0	1	1	#DIV/0!	#DIV/0!
DAYTIME SLEEPINESS								15									1	6			0.538462	7	0	0
Daytime sleepiness		392.308	0.0786667	26.1538	34	22.8571	22	15	6	7	2	0	0	0	0	15	1	6	1	3	0.538462	7	0.105263	2	1	1	1	1
SPEECH & VOICE DOMAIN								10									1	6			0.230769	3	0.0526316	1
Speech changes/problems (NOS)		498.929	0.138	45.3571	49.75	39.5	#DIV/0!	11	6	3	2	0	0	0	0	11	1	6	0.666667	2	0.230769	3	0.105263	2	1	1	1	1
SPEECH CHANGES								4									0.5	3			0	0	0.0526316	1
Speech - Articulation (incl. slurring, rhythmic abilities)		85.5	0.06	28.5	28.5	#DIV/0!	#DIV/0!	4	3	0	1	1	1	0	0	3	0.333333	2	0.666667	2	0	0	0.0526316	1	0.75	0.666667	#DIV/0!	1
Speech- verbal fluency		5	#DIV/0!	5	5	#DIV/0!	#DIV/0!	1	1	0	0	0	0	0	0	1	0.166667	1	0	0	0	0	0	0	1	1	#DIV/0!	#DIV/0!
VOICE CHANGES								5									0.666667	4			0	0	0.0526316	1
Voice changes (NOS)		#DIV/0!	0.02	#DIV/0!	#DIV/0!	#DIV/0!	#DIV/0!	0	1	0	0	0	0	0	0	1	0.17	0	0.17	0	0	0	0	0	#DIV/0!	#DIV/0!	#DIV/0!	#DIV/0!
Phonation		#DIV/0!	#DIV/0!	#DIV/0!	#DIV/0!	#DIV/0!	#DIV/0!	1	0	0	1	0	0	0	0	1	0	0	0	0	0	0	0.0526316	1	1	#DIV/0!	#DIV/0!	1
Speech - Prosodic impairment (monotone)		31	0.06	31	31	#DIV/0!	#DIV/0!	1	1	0	0	0	0	0	0	1	0.166667	1	0.333333	1	0	0	0	0	1	1	#DIV/0!	#DIV/0!
Speech - Quiet voice		198	0.057	66	66	#DIV/0!	#DIV/0!	3	3	0	0	0	0	0	0	3	0.5	3	0.666667	2	0	0	0	0	1	1	#DIV/0!	#DIV/0!
Speech - voice quality		96	0.06	32	32	#DIV/0!	#DIV/0!	3	3	0	0	0	0	0	0	3	0.5	3	0.333333	1	0	0	0	0	1	1	#DIV/0!	#DIV/0!
DIGESTIVE SYSTEM DOMAIN								17									1	6			0.692308	9	0.0526316	1
GI - (General dysfunction NOS)		172.6	#DIV/0!	57.5333	#DIV/0!	57.5333	#DIV/0!	3	0	3	0	0	0	0	0	3	0	0	0	0	0.230769	3	0	0	1	#DIV/0!	1	#DIV/0!
MOUTH & THROAT								15									1	6			0.692308	9	0	0
SALIVA CONTROL								13									0.833333	5			0.615385	8	0	0
Drooling/Sialorrhea/saliva control		364	#DIV/0!	30.3333	31	30	#DIV/0!	13	5	8	0	1	1	0	0	12	0.666667	4	0.333333	1	0.615385	8	0	0	0.923077	0.8	1	#DIV/0!
Dry mouth		6	#DIV/0!	3	3	#DIV/0!	#DIV/0!	3	3	0	0	1	1	0	0	2	0.333333	2	0.666667	2	0	0	0	0	0.666667	0.666667	#DIV/0!	#DIV/0!
CHEWING & SWALLOWING								13									1	6			0.538462	7	0	0
GI - Eating - Globus		16.7	#DIV/0!	16.7	#DIV/0!	16.7	#DIV/0!	1	0	1	0	0	0	0	0	1	0	0	0	0	0.0769231	1	0	0	1	#DIV/0!	1	#DIV/0!
GI - Dysphagia		76.1	#DIV/0!	15.22	#DIV/0!	15.22	#DIV/0!	5	0	5	0	0	0	0	0	5	0	0	0	0	0.384615	5	0	0	1	#DIV/0!	1	#DIV/0!
GI - Chewing		43.6	#DIV/0!	21.8	30	13.6	#DIV/0!	2	1	1	0	0	0	0	0	2	0.166667	1	0	0	0.0769231	1	0	0	1	1	1	#DIV/0!
GI - Impaired swallowing		241.756	0.0473	21.9778	26.75	18.16	#DIV/0!	11	6	5	0	0	0	0	0	11	1	6	1	3	0.384615	5	0	0	1	1	1	#DIV/0!
GI - Eating - Choking		74.6	0.09	18.65	13	20.5333	#DIV/0!	5	2	3	0	1	1	0	0	4	0.166667	1	0.666667	2	0.230769	3	0	0	0.8	0.5	1	#DIV/0!
GI - Eating - pain during swallow		11.2	0.01	5.6	#DIV/0!	5.6	#DIV/0!	2	1	1	0	0	0	0	0	2	0.166667	1	0.333333	1	0.0769231	1	0	0	1	1	1	#DIV/0!
GI - Eating - Problems (NOS)		#DIV/0!	#DIV/0!	#DIV/0!	#DIV/0!	#DIV/0!	#DIV/0!	0	0	0	0	0	0	0	0	0	0	0	0	0	0	0	0	0	#DIV/0!	#DIV/0!	#DIV/0!	#DIV/0!
GI - esophageal transit time		#DIV/0!	#DIV/0!	#DIV/0!	#DIV/0!	#DIV/0!	#DIV/0!	0	0	0	0	0	0	0	0	0	0	0	0	0	0	0	0	0	#DIV/0!	#DIV/0!	#DIV/0!	#DIV/0!
STOMACH								11									0.666667	4			0.538462	7	0	0
GI - Eating - Acid reflux & GERD		7.4	#DIV/0!	7.4	#DIV/0!	7.4	#DIV/0!	1	0	1	0	0	0	0	0	1	0	0	0	0	0.0769231	1	0	0	1	#DIV/0!	1	#DIV/0!
GI - Eating - Early satiety		61.6	#DIV/0!	15.4	#DIV/0!	15.4	#DIV/0!	4	0	4	0	0	0	0	0	4	0	0	0	0	0.307692	4	0	0	1	#DIV/0!	1	#DIV/0!
GI - abdominal pain		18	0.005	9	#DIV/0!	9	#DIV/0!	2	1	1	0	0	0	0	0	2	0.166667	1	0.333333	1	0.0769231	1	0	0	1	1	1	#DIV/0!
GI - Nausea & Vomiting		25.875	0.01	5.175	5	5.23333	#DIV/0!	6	3	3	0	1	1	0	0	5	0.333333	2	0.666667	2	0.230769	3	0	0	0.833333	0.666667	1	#DIV/0!
GI - Bloating/Fullness		30	0.008	15	#DIV/0!	15	#DIV/0!	2	1	1	0	0	0	0	0	2	0.166667	1	0.333333	1	0.0769231	1	0	0	1	1	1	#DIV/0!
Appetite changes		20	#DIV/0!	10	5	15	#DIV/0!	4	3	1	0	2	2	0	0	2	0.166667	1	0.666667	2	0.0769231	1	0	0	0.5	0.333333	1	#DIV/0!
BOWEL								19									1	6			0.846154	11	0.0526316	1
CONSTIPATION								19									1	6			0.846154	11	0.0526316	1
GI - constipation		559.941	0.0722	29.4706	26.75	29.4364	35.1	19	6	11	2	0	0	0	0	19	1	6	1	3	0.846154	11	0.105263	2	1	1	1	1
GI - Tenesmus		20.4	#DIV/0!	20.4	#DIV/0!	20.4	#DIV/0!	1	0	1	0	0	0	0	0	1	0	0	0	0	0.0769231	1	0	0	1	#DIV/0!	1	#DIV/0!
GI - straining during BM		169.4	#DIV/0!	42.35	#DIV/0!	42.35	#DIV/0!	4	0	4	0	0	0	0	0	4	0	0	0	0	0.307692	4	0	0	1	#DIV/0!	1	#DIV/0!
BOWEL EMPTYING								9									0.166667	1			0.538462	7	0	0
GI - Bowel urgency		#DIV/0!	#DIV/0!	#DIV/0!	#DIV/0!	#DIV/0!	#DIV/0!	1	1	0	0	1	1	0	0	0	0	0	0.333333	1	0	0	0	0	0	0	#DIV/0!	#DIV/0!
GI - incontinence		19.2	#DIV/0!	4.8	#DIV/0!	4.8	#DIV/0!	7	1	5	1	3	1	1	1	4	0	0	0.333333	1	0.307692	4	0	0	0.571429	0	0.8	0
GI - Bowl emptying		38.3	#DIV/0!	12.7667	#DIV/0!	12.7667	#DIV/0!	3	0	3	0	0	0	0	0	3	0	0	0	0	0.230769	3	0	0	1	#DIV/0!	1	#DIV/0!
GI - anal sphincter control		11.1	#DIV/0!	11.1	#DIV/0!	11.1	#DIV/0!	1	0	1	0	0	0	0	0	1	0	0	0	0	0.0769231	1	0	0	1	#DIV/0!	1	#DIV/0!
DIARRHEA
GI - loose stool/diarrhea		3.7	#DIV/0!	3.7	#DIV/0!	3.7	#DIV/0!	2	1	1	0	1	1	0	0	1	0	0	0	1	0.0769231	1	0	0	0.5	0	1	#DIV/0!
URINARY DOMAIN								17									1	6			0.769231	10	0	0
URINARY DYSFUNCTION								17									1	6			0.769231	10	0	0
GU - Urinary Dysfunction NOS		405.111	0.0496	40.5111	26	47.7667	#DIV/0!	10	4	6	0	0	0	0	0	10	0.666667	4	0.333333	1	0.461538	6	0	0	1	1	1	#DIV/0!
GU - Urinary frequency		222.8	0.13	55.7	38	61.6	#DIV/0!	4	1	3	0	0	0	0	0	4	0.166667	1	0.333333	1	0.230769	3	0	0	1	1	1	#DIV/0!
GU - Urinary Urgency		161.14	0.016	23.02	#DIV/0!	23.02	#DIV/0!	7	1	6	0	0	0	0	0	7	0.166667	1	0.333333	1	0.461538	6	0	0	1	1	1	#DIV/0!
GU - Nocturia		378.4	0.144	47.3	69	43.6833	#DIV/0!	9	2	6	1	1	0	0	1	8	0.333333	2	0.666667	2	0.461538	6	0	0	0.888889	1	1	0
GU - incomplete voiding		96.8	#DIV/0!	32.2667	#DIV/0!	32.2667	#DIV/0!	3	0	3	0	0	0	0	0	3	0	0	0	0	0.230769	3	0	0	1	#DIV/0!	1	#DIV/0!
GU - Urinary Incontinence		136.95	0.0285	22.825	#DIV/0!	21.4333	27	6	2	3	1	0	0	0	0	6	0.333333	2	0.666667	2	0.230769	3	0.0526316	1	1	1	1	1
GU - Urinary infections		#DIV/0!	#DIV/0!	#DIV/0!	#DIV/0!	#DIV/0!	#DIV/0!	0	0	0	0	0	0	0	0	0	0	0	0	0	0	0	0	0	#DIV/0!	#DIV/0!	#DIV/0!	#DIV/0!
GU - Weak urine stream		80.1	#DIV/0!	40.05	#DIV/0!	40.05	#DIV/0!	2	0	2	0	0	0	0	0	2	0	0	0	0	0.153846	2	0	0	1	#DIV/0!	1	#DIV/0!
SEXUAL DOMAIN								12									0.833333	5			0.538462	7	0	0
SEXUAL DYSFUNCTION								12									0.833333	5			0.538462	7	0	0
Sexual - dysfunction		210	0.0213333	17.5	6.33333	22.2857	#DIV/0!	12	5	7	0	0	0	0	0	12	0.833333	5	1	3	0.538462	7	0	0	1	1	1	#DIV/0!
Sexual - anorgasmia		104.2	#DIV/0!	34.7333	#DIV/0!	34.7333	#DIV/0!	3	0	3	0	0	0	0	0	3	0	0	0	0	0.230769	3	0	0	1	#DIV/0!	1	#DIV/0!
Sexual - Ejaculatory dysfunction (M)		96	#DIV/0!	32	#DIV/0!	32	#DIV/0!	3	0	3	0	0	0	0	0	3	0	0	0	0	0.230769	3	0	0	1	#DIV/0!	1	#DIV/0!
Sexual - erectile dysfunction		172.133	0.008	43.0333	#DIV/0!	43.0333	#DIV/0!	4	1	3	0	0	0	0	0	4	0.166667	1	0.333333	1	0.230769	3	0	0	1	1	1	#DIV/0!
Sexual - Impaired libido		10.6	#DIV/0!	5.3	#DIV/0!	5.3	#DIV/0!	3	0	3	0	1	0	1	0	2	0	0	0	0	0.153846	2	0	0	0.666667	#DIV/0!	0.666667	#DIV/0!
Sexual - Vaginal dryness (F)		88.3	#DIV/0!	29.4333	#DIV/0!	29.4333	#DIV/0!	3	0	3	0	0	0	0	0	3	0	0	0	0	0.230769	3	0	0	1	#DIV/0!	1	#DIV/0!
AUTONOMIC NERVOUS SYSTEM DOMAIN								16									1	6			0.692308	9	0.0526316	1
Diagnostic - Dopamine Dysregulation Syndrome		2	#DIV/0!	2	#DIV/0!	2	#DIV/0!	1	0	1	0	0	0	0	0	1	0	0	0	0	0.0769231	1	0	0	1	#DIV/0!	1	#DIV/0!
ANS - Autonomic symptoms NOS		214.2	#DIV/0!	71.4	#DIV/0!	71.4	#DIV/0!	3	0	1	2	0	0	0	0	3	0	0	0	0	0.0769231	1	0.105263	2	1	#DIV/0!	1	1
CARDIOVASCULAR SYMPTOMS								11									0.5	3			0.538462	7	0.0526316	1
ANS - Cardiovascular symptoms		55.5	#DIV/0!	27.75	#DIV/0!	27.75	#DIV/0!	2	0	2	0	0	0	0	0	2	0	0	0	0	0.153846	2	0	0	1	#DIV/0!	1	#DIV/0!
ANS - Blood pressure		5	#DIV/0!	5	5	#DIV/0!	#DIV/0!	1	1	0	0	0	0	0	0	1	0.166667	1	0	0	0	0	0	0	1	1	#DIV/0!	#DIV/0!
HYPOTENSION
ANS - orthstatic hypotension		#DIV/0!	#DIV/0!	#DIV/0!	#DIV/0!	#DIV/0!	#DIV/0!	2	1	0	1	0	0	0	0	2	0.166667	1	0.333333	1	0	0	0.0526316	1	1	1	#DIV/0!	1
ANS - Orthostatic symptoms		53.1	#DIV/0!	17.7	#DIV/0!	17.7	#DIV/0!	3	0	3	0	0	0	0	0	3	0	0	0	0	0.230769	3	0	0	1	#DIV/0!	1	#DIV/0!
HYPERTENSION
ANS - supine hypertension		#DIV/0!	#DIV/0!	#DIV/0!	#DIV/0!	#DIV/0!	#DIV/0!	0	0	0	0	0	0	0	0	0	0	0	0	0	0	0	0	0	#DIV/0!	#DIV/0!	#DIV/0!	#DIV/0!
ANS - Nocturnal hypertention		#DIV/0!	#DIV/0!	#DIV/0!	#DIV/0!	#DIV/0!	#DIV/0!	0	0	0	0	0	0	0	0	0	0	0	0	0	0	0	0	0	#DIV/0!	#DIV/0!	#DIV/0!	#DIV/0!
ANS - lack of < in nocturnal BP		#DIV/0!	#DIV/0!	#DIV/0!	#DIV/0!	#DIV/0!	#DIV/0!	0	0	0	0	0	0	0	0	0	0	0	0	0	0	0	0	0	#DIV/0!	#DIV/0!	#DIV/0!	#DIV/0!
LOWER EXTREMITY SWELLING
Swelling (extremities)		48.7	#DIV/0!	12.175	14	11.5667	#DIV/0!	5	2	3	0	1	1	0	0	4	0.166667	1	0	0	0.230769	3	0	0	0.8	0.5	1	#DIV/0!
LIGHTHEADED, DIZZY, FAINTING								13									1	6			0.538462	7	0	0
Dizziness		112.7	0.027	16.1	18.3333	12.75	#DIV/0!	7	4	3	0	0	0	0	0	7	0.666667	4	0.666667	2	0.230769	3	0	0	1	1	1	#DIV/0!
Lightheadedness		220.611	0.0303333	20.0556	16	23.3	#DIV/0!	11	6	5	0	0	0	0	0	11	1	6	1	3	0.384615	5	0	0	1	1	1	#DIV/0!
Lightheaded w/prolonged standing		27.1	#DIV/0!	13.55	#DIV/0!	13.55	#DIV/0!	2	0	2	0	0	0	0	0	2	0	0	0	0	0.153846	2	0	0	1	#DIV/0!	1	#DIV/0!
Syncope		8	#DIV/0!	2	3	1.66667	#DIV/0!	4	1	3	0	0	0	0	0	4	0.166667	1	0	0	0.230769	3	0	0	1	1	1	#DIV/0!
SWEATING								8													0.461538	6	0	0
Sweating/hyperhidrosis		89.6	0.008	12.8	#DIV/0!	12.8	#DIV/0!	8	2	6	0	1	1	0	0	7	0.166667	1	0.666667	2	0.461538	6	0	0	0.875	0.5	1	#DIV/0!
FUNCTIONAL IMPACTS
PHYSICAL FUNCTIONING DOMAIN								12									1	6			0.384615	5	0	0
MOBILITY								8									0.833333	5			0.153846	2	0	0
Mobility		347.5	0.308	69.5	69.5	#DIV/0!	#DIV/0!	5	3	1	1	0	0	0	0	5	0.5	3	0.333333	1	0.0769231	1	0.0526316	1	1	1	1	1
Getting out of bed/chair/car		123.36	0.032	20.56	17.25	33.8	#DIV/0!	6	5	1	0	0	0	0	0	6	0.833333	5	0.333333	1	0.0769231	1	0	0	1	1	1	#DIV/0!
Turning in bed		112.3	#DIV/0!	28.075	14	26.3	58	5	3	1	1	1	1	0	0	4	0.333333	2	0.333333	1	0.0769231	1	0.0526316	1	0.8	0.666667	1	1
Standing		63	0.024	21	21	#DIV/0!	#DIV/0!	3	3	0	0	0	0	0	0	3	0.5	3	0.333333	1	0	0	0	0	1	1	#DIV/0!	#DIV/0!
Kneeling/bending		3	#DIV/0!	3	3	#DIV/0!	#DIV/0!	1	1	0	0	0	0	0	0	1	0.166667	1	0	0	0	0	0	0	1	1	#DIV/0!	#DIV/0!
Climbing stairs		66.6667	0.01	16.6667	16.6667	#DIV/0!	#DIV/0!	4	4	0	0	0	0	0	0	4	0.666667	4	0.333333	1	0	0	0	0	1	1	#DIV/0!	#DIV/0!
Lifting/holding/carrying		90.6667	0.01	22.6667	22.6667	#DIV/0!	#DIV/0!	4	4	0	0	0	0	0	0	4	0.666667	4	0.333333	1	0	0	0	0	1	1	#DIV/0!	#DIV/0!
Gripping and opening		76	#DIV/0!	25.3333	25.3333	#DIV/0!	#DIV/0!	4	4	0	0	1	1	0	0	3	0.5	3	0.333333	1	0	0	0	0	0.75	0.75	#DIV/0!	#DIV/0!
Handwriting		412.08	0.048	68.68	73	51.4	#DIV/0!	6	5	1	0	0	0	0	0	6	0.833333	5	0.333333	1	0.0769231	1	0	0	1	1	1	#DIV/0!
Using a computer		154.5	0.032	51.5	51.5	#DIV/0!	#DIV/0!	3	3	0	0	0	0	0	0	3	0.5	3	0.333333	1	0	0	0	0	1	1	#DIV/0!	#DIV/0!
Using smartphone/tablet		34.5	0.008	11.5	11.5	#DIV/0!	#DIV/0!	3	3	0	0	0	0	0	0	3	0.5	3	0.333333	1	0	0	0	0	1	1	#DIV/0!	#DIV/0!
Exercise/activity/sports		303.333	0.226	60.6667	60.6667	#DIV/0!	#DIV/0!	5	4	1	0	0	0	0	0	5	0.666667	4	0.333333	1	0.0769231	1	0	0	1	1	1	#DIV/0!
PHYSICAL COMFORT								2									0.333333	2			0	0	0	0
Increased physical discomfort		76	0.129	38	38	#DIV/0!	#DIV/0!	2	2	0	0	0	0	0	0	2	0.333333	2	0.333333	1	0	0	0	0	1	1	#DIV/0!	#DIV/0!
Feeling unwell		#DIV/0!	0.024	#DIV/0!	#DIV/0!	#DIV/0!	#DIV/0!	1	1	0	0	0	0	0	0	1	0.166667	1	0.333333	1	0	0	0	0	1	1	#DIV/0!	#DIV/0!
Difficulty relaxing		#DIV/0!	0.016	#DIV/0!	#DIV/0!	#DIV/0!	#DIV/0!	1	1	0	0	0	0	0	0	1	0.166667	1	0.333333	1	0	0	0	0	1	1	#DIV/0!	#DIV/0!
EFFORT OF LIVING								5									0.833333	5			0	0	0	0
Work of living		#DIV/0!	0.29	#DIV/0!	#DIV/0!	#DIV/0!	#DIV/0!	1	1	0	0	0	0	0	0	1	0.166667	1	0.333333	1	0	0	0	0	1	1	#DIV/0!	#DIV/0!
Longer to do things/Functional slowness		84	0.161	28	28	#DIV/0!	#DIV/0!	3	3	0	0	0	0	0	0	3	0.5	3	0.333333	1	0	0	0	0	1	1	#DIV/0!	#DIV/0!
Everything takes more effort		82	0.282	41	41	#DIV/0!	#DIV/0!	2	2	0	0	0	0	0	0	2	0.333333	2	0.333333	1	0	0	0	0	1	1	#DIV/0!	#DIV/0!
Having to plan around PD		30	#DIV/0!	15	15	#DIV/0!	#DIV/0!	3	3	0	0	1	1	0	0	2	0.333333	2	0.333333	1	0	0	0	0	0.666667	0.666667	#DIV/0!	#DIV/0!
SELF-CARE								5									0.666667	4			0.0769231	1	0	0
Dressing		148.5	0.024	29.7	28.3333	33.8	#DIV/0!	5	4	1	0	0	0	0	0	5	0.666667	4	0.333333	1	0.0769231	1	0	0	1	1	1	#DIV/0!
Personal hygiene/self-care		117.625	0.032	23.525	24	22.1	#DIV/0!	5	4	1	0	0	0	0	0	5	0.666667	4	0.333333	1	0.0769231	1	0	0	1	1	1	#DIV/0!
Eating tasks		239.375	0.032	47.875	54.6667	27.5	#DIV/0!	5	4	1	0	0	0	0	0	5	0.666667	4	0.333333	1	0.0769231	1	0	0	1	1	1	#DIV/0!
SAFETY								6									0.833333	5			0.0769231	1	0	0
Accidental self-injury		6	0.048	3	3	#DIV/0!	#DIV/0!	2	2	0	0	0	0	0	0	2	0.333333	2	0.333333	1	0	0	0	0	1	1	#DIV/0!	#DIV/0!
Tripping & Falling		109.5	0.049	18.25	21	10	#DIV/0!	8	5	3	0	2	0	2	0	6	0.833333	5	0.666667	2	0.0769231	1	0	0	0.75	1	0.333333	#DIV/0!
Weight change (?)		33.1	#DIV/0!	8.275	10	6.55	#DIV/0!	4	2	2	0	0	0	0	0	4	0.333333	2	0	0	0.153846	2	0	0	1	1	1	#DIV/0!
PSYCHOSOCIAL FUNCTIONING DOMAIN								9									1	6			0.230769	3	0	0
INDEPENDENCE								4									0.666667	4			0	0	0	0
Independence/greater dependence on others		26	0.24	13	13	#DIV/0!	#DIV/0!	2	2	0	0	0	0	0	0	2	0.333333	2	0.333333	1	0	0	0	0	1	1	#DIV/0!	#DIV/0!
Cooking/Meal prep		116	0.016	29	29	#DIV/0!	#DIV/0!	4	4	0	0	0	0	0	0	4	0.666667	4	0.333333	1	0	0	0	0	1	1	#DIV/0!	#DIV/0!
Doing shopping		#DIV/0!	0.016	#DIV/0!	#DIV/0!	#DIV/0!	#DIV/0!	1	1	0	0	0	0	0	0	1	0.166667	1	0.333333	1	0	0	0	0	1	1	#DIV/0!	#DIV/0!
House work/home maintenance/garden		154.667	0.024	38.6667	38.6667	#DIV/0!	#DIV/0!	4	4	0	0	0	0	0	0	4	0.666667	4	0.333333	1	0	0	0	0	1	1	#DIV/0!	#DIV/0!
Travel/Driving		160	#DIV/0!	40	40	#DIV/0!	#DIV/0!	4	4	0	0	0	0	0	0	4	0.666667	4	0.333333	1	0	0	0	0	1	1	#DIV/0!	#DIV/0!
SELF-CONCEPT								4									0.666667	4			0	0	0	0
Altered self-concept		147	0.35	49	49	#DIV/0!	#DIV/0!	3	3	0	0	0	0	0	0	3	0.5	3	0.333333	1	0	0	0	0	1	1	#DIV/0!	#DIV/0!
Embarrassment/self-conscious		159	0.11	53	53	#DIV/0!	#DIV/0!	3	3	0	0	0	0	0	0	3	0.5	3	0.333333	1	0	0	0	0	1	1	#DIV/0!	#DIV/0!
Feeling stigmatized		88	0.22	44	44	#DIV/0!	#DIV/0!	2	2	0	0	0	0	0	0	2	0.333333	2	0.333333	1	0	0	0	0	1	1	#DIV/0!	#DIV/0!
SELF EFFICACY								4									0.666667	4			0	0	0	0
Decreased Self confidence		130	0.078	65	65	#DIV/0!	#DIV/0!	2	2	0	0	0	0	0	0	2	0.333333	2	0.333333	1	0	0	0	0	1	1	#DIV/0!	#DIV/0!
Sense of helplessness		36	#DIV/0!	18	18	#DIV/0!	#DIV/0!	2	2	0	0	0	0	0	0	2	0.333333	2	0	0	0	0	0	0	1	1	#DIV/0!	#DIV/0!
Sense that PD limits what you can do		182	0.282	91	91	#DIV/0!	#DIV/0!	2	2	0	0	0	0	0	0	2	0.333333	2	0.333333	1	0	0	0	0	1	1	#DIV/0!	#DIV/0!
COPING								5									0.833333	5			0	0	0	0
Altered coping		54	0.29	18	18	#DIV/0!	#DIV/0!	3	3	0	0	0	0	0	0	3	0.5	3	0.333333	1	0	0	0	0	1	1	#DIV/0!	#DIV/0!
Living with uncertainty		50	#DIV/0!	50	50	#DIV/0!	#DIV/0!	1	1	0	0	0	0	0	0	1	0.166667	1	0	0	0	0	0	0	1	1	#DIV/0!	#DIV/0!
Preoccupation with disease		82	#DIV/0!	41	41	#DIV/0!	#DIV/0!	2	2	0	0	0	0	0	0	2	0.333333	2	0	0	0	0	0	0	1	1	#DIV/0!	#DIV/0!
Increased fear		228.333	0.0875	45.6667	45.6667	#DIV/0!	#DIV/0!	5	5	0	0	0	0	0	0	5	0.833333	5	0.666667	2	0	0	0	0	1	1	#DIV/0!	#DIV/0!
Fear of falling		#DIV/0!	0.071	#DIV/0!	#DIV/0!	#DIV/0!	#DIV/0!	1	1	0	0	0	0	0	0	1	0.166667	1	0.333333	1	0	0	0	0	1	1	#DIV/0!	#DIV/0!
Fear of future		182.667	0.11	45.6667	45.6667	#DIV/0!	#DIV/0!	4	4	0	0	0	0	0	0	4	0.666667	4	0.333333	1	0	0	0	0	1	1	#DIV/0!	#DIV/0!
Avoidance		23	#DIV/0!	11.5	11.5	#DIV/0!	#DIV/0!	2	2	0	0	0	0	0	0	2	0.333333	2	0	0	0	0	0	0	1	1	#DIV/0!	#DIV/0!
Denial		34	#DIV/0!	34	34	#DIV/0!	#DIV/0!	2	2	0	0	1	1	0	0	1	0.166667	1	0	0	0	0	0	0	0.5	0.5	#DIV/0!	#DIV/0!
Concealing diagnosis		19	#DIV/0!	19	19	#DIV/0!	#DIV/0!	1	1	0	0	0	0	0	0	1	0.166667	1	0	0	0	0	0	0	1	1	#DIV/0!	#DIV/0!
Annoyance/bothered		69	#DIV/0!	69	69	#DIV/0!	#DIV/0!	1	1	0	0	0	0	0	0	1	0.166667	1	0	0	0	0	0	0	1	1	#DIV/0!	#DIV/0!
Frustration/Anger		96	0.056	24	24	#DIV/0!	#DIV/0!	4	4	0	0	0	0	0	0	4	0.666667	4	0.333333	1	0	0	0	0	1	1	#DIV/0!	#DIV/0!
Stress, distress, overwhelmed		108	0.089	27	27	#DIV/0!	#DIV/0!	4	4	0	0	0	0	0	0	4	0.666667	4	0.333333	1	0	0	0	0	1	1	#DIV/0!	#DIV/0!
Finding ways to compensate		53	#DIV/0!	53	53	#DIV/0!	#DIV/0!	1	1	0	0	0	0	0	0	1	0.166667	1	0	0	0	0	0	0	1	1	#DIV/0!	#DIV/0!
Making positive changes to take control of disease		47	#DIV/0!	47	47	#DIV/0!	#DIV/0!	1	1	0	0	0	0	0	0	1	0.166667	1	0	0	0	0	0	0	1	1	#DIV/0!	#DIV/0!
INTERPERSONAL INTERACTIONS								8									1	6			0.153846	2	0	0
Interpersonal interactions (all)		#DIV/0!	0.4	#DIV/0!	#DIV/0!	#DIV/0!	#DIV/0!	1	1	0	0	0	0	0	0	1	0.166667	1	0.333333	1	0	0	0	0	1	1	#DIV/0!	#DIV/0!
Relationships with others (friends, family, colleagues)		318	0.089	53	53	#DIV/0!	#DIV/0!	6	4	2	0	0	0	0	0	6	0.666667	4	0.333333	1	0.153846	2	0	0	1	1	1	#DIV/0!
Others perceptions and reactions		11	#DIV/0!	11	11	#DIV/0!	#DIV/0!	1	1	0	0	0	0	0	0	1	0.166667	1	0	0	0	0	0	0	1	1	#DIV/0!	#DIV/0!
Communication		196.25	0.089	39.25	39.25	#DIV/0!	#DIV/0!	5	5	0	0	0	0	0	0	5	0.833333	5	0.333333	1	0	0	0	0	1	1	#DIV/0!	#DIV/0!
Loneliness/isolation		110	0.0115	22	22	#DIV/0!	#DIV/0!	5	5	0	0	0	0	0	0	5	0.833333	5	0.666667	2	0	0	0	0	1	1	#DIV/0!	#DIV/0!
ROLES AND RESPONSIBILITIES								4									0.666667	4			0	0	0	0
Taking care of family		6	0.016	3	3	#DIV/0!	#DIV/0!	2	2	0	0	0	0	0	0	2	0.333333	2	0.333333	1	0	0	0	0	1	1	#DIV/0!	#DIV/0!
Taking care of pets		6	0.008	3	3	#DIV/0!	#DIV/0!	2	2	0	0	0	0	0	0	2	0.333333	2	0.333333	1	0	0	0	0	1	1	#DIV/0!	#DIV/0!
Impact on job/career/profession		217.333	0.105	54.3333	54.3333	#DIV/0!	#DIV/0!	4	4	0	0	0	0	0	0	4	0.666667	4	0.333333	1	0	0	0	0	1	1	#DIV/0!	#DIV/0!
Financial impact/paying bills		3	#DIV/0!	3	3	#DIV/0!	#DIV/0!	2	2	0	0	1	1	0	0	1	0.166667	1	0.333333	1	0	0	0	0	0.5	0.5	#DIV/0!	#DIV/0!
IMPORTANT ACTIVITIES								6									0.833333	5			0.0769231	1	0	0
Pleasurable activities		#DIV/0!	0.19	#DIV/0!	#DIV/0!	#DIV/0!	#DIV/0!	1	1	0	0	0	0	0	0	1	0.166667	1	0.333333	1	0	0	0	0	1	1	#DIV/0!	#DIV/0!
Loss of things you enjoy		#DIV/0!	0.137	#DIV/0!	#DIV/0!	#DIV/0!	#DIV/0!	1	1	0	0	0	0	0	0	1	0.166667	1	0.333333	1	0	0	0	0	1	1	#DIV/0!	#DIV/0!
Social life		#DIV/0!	0.169	#DIV/0!	#DIV/0!	#DIV/0!	#DIV/0!	1	1	0	0	0	0	0	0	1	0.166667	1	0.333333	1	0	0	0	0	1	1	#DIV/0!	#DIV/0!
Playing musical instrument		26	0.024	13	13	#DIV/0!	#DIV/0!	2	2	0	0	0	0	0	0	2	0.333333	2	0.333333	1	0	0	0	0	1	1	#DIV/0!	#DIV/0!
Spiritual and Religious Activities		9	#DIV/0!	9	9	#DIV/0!	#DIV/0!	1	1	0	0	0	0	0	0	1	0.166667	1	0	0	0	0	0	0	1	1	#DIV/0!	#DIV/0!
Hobbies/leisure		282.72	0.016	47.12	52.25	26.6	#DIV/0!	6	5	1	0	0	0	0	0	6	0.833333	5	0.333333	1	0.0769231	1	0	0	1	1	1	#DIV/0!
CONTEXTUAL FACTORS
Symmetrical symptom onset		#DIV/0!	#DIV/0!	#DIV/0!	#DIV/0!	#DIV/0!	#DIV/0!	0	0	0	0	0	0	0	0	0	0	0	0	0	0	0	0	0	#DIV/0!	#DIV/0!	#DIV/0!	#DIV/0!
Most dominant/obvious issues		#DIV/0!	0.401	#DIV/0!	#DIV/0!	#DIV/0!	#DIV/0!	1	1	0	0	0	0	0	0	1	0.166667	1	0.333333	1	0	0	0	0	1	1	#DIV/0!	#DIV/0!
Frequency and severity of symptoms		#DIV/0!	0.621	#DIV/0!	#DIV/0!	#DIV/0!	#DIV/0!	1	1	0	0	0	0	0	0	1	0.166667	1	0.333333	1	0	0	0	0	1	1	#DIV/0!	#DIV/0!
Medication dose failure/delayed on		#DIV/0!	0.007	#DIV/0!	#DIV/0!	#DIV/0!	#DIV/0!	1	1	0	0	0	0	0	0	1	0.166667	1	0.333333	1	0	0	0	0	1	1	#DIV/0!	#DIV/0!
Nocturnal motor symptoms		#DIV/0!	#DIV/0!	#DIV/0!	#DIV/0!	#DIV/0!	#DIV/0!	1	0	0	1	0	0	0	0	1	0	0	0	0	0	0	0.0526316	1	1	#DIV/0!	#DIV/0!	1
Motor fluctuations		#DIV/0!	#DIV/0!	#DIV/0!	#DIV/0!	#DIV/0!	#DIV/0!	1	0	1	0	1	0	1	0	0	0	0	0	0	0	0	0	0	0	#DIV/0!	0	#DIV/0!
Energy intake		#DIV/0!	#DIV/0!	#DIV/0!	#DIV/0!	#DIV/0!	#DIV/0!	0	0	0	0	0	0	0	0	0	0	0	0	0	0	0	0	0	#DIV/0!	#DIV/0!	#DIV/0!	#DIV/0!
"Off" periods		#DIV/0!	0.013	#DIV/0!	#DIV/0!	#DIV/0!	#DIV/0!	1	1	0	0	0	0	0	0	1	0.166667	1	0.333333	1	0	0	0	0	1	1	#DIV/0!	#DIV/0!
Medication side effects		6	0.0373	3	3	#DIV/0!	#DIV/0!	2	2	0	0	0	0	0	0	2	0.333333	2	0.333333	1	0	0	0	0	1	1	#DIV/0!	#DIV/0!
FOOTNOTES.
Mean prevalence across unique samples (%)		Mean pevalence across samples (%)
Mean prevalence in Tier 1B samples		%Tier 1
Mean prevalence in Tier 2 sa,mples		%Tier 2
Mean prevalence in Tier 3 samples		%Tier 3
# Unique Sample Studies reporting		The total number of studies with a unique sample that reported whether the symptom or impact with present or not.
#Tier 1 - Qualitative, unrestricted reporting approach		The total number of Tier 1 studies with a unique sample that reported whether the symptom or impact with present or not.
#Tier 2 - Patient Reported Outcomes (quantitative, restricted)		The total number of Tier 2 studies with a unique sample that reported whether the symptom or impact with present or not.
#Tier 3 - Clinician and Observer reported outcomes (quantitative, restricted)		The total number of Tier 3 studies with a unique sample that reported whether the symptom or impact with present or not.
# Unique sample studies disconfirming		The number of studies that reported a symptom was not present or was not statistically different from a normative population
#Tier 1		Number in Tier 1
#Tier 2		Number in Tier 2
#Tier 3		Number in Tier 3
Total number of sources confirming		(All measured less disconfirming)
% of Tier 1A/B Sources - Present in early PD		The percent (%) of all Tier 1 sources that indicate that the symptom/impact is present in an early PD population based on unrestricted PwP and family report
Tier 1 All (#/7 unique sample studies)		The number of all Tier 1 sources that indicate that the symptom/impact is present in an early PD population based on unrestricted PwP or family member report
% of Tier 1A Sources - Bothersome in early PD		The percent (%) of Tier 1A sources that indicate a symptom is actively amoun the most bothersome aspects of early PD based on PwP and family report (does not indicate the prevalance of the symptom as above)
Tier 1A (#/4 unique sample studies)		The number of Tier 1A sources that indicate a symptom is actively among the most bothersome aspects of early PD based on PwP self report (does not indicate the prevalance of the symptom as above)
% of Tier 2 Sources - present		The percent (%) of all Tier 2 sources that indicate that the symptom/impact is present in an early PD population based on a mixture of clinician and some patient/family report via standardized measures (restricted report).
Tier 2 (#/N)		The number of all Tier 2 sources that indicate that the symptom/impact is present in an early PD population based on a mixture of clinician and some patient/family report via standardized measures (restricted report).
% of Tier 3 Sources - Present		The percent (%) of all Tier 3 sources that indicate that the symptom/impact is present in an early PD population based on clinician obseration or report without patient or family perspective.
Tier 3 (#/N)		The number of all Tier 3 sources that indicate that the symptom/impact is present in an early PD population based on clinician obseration or report without patient or family perspective.
Percent agreement in sources measuring concept		The extent to which all sources agree that the symptom is present in early PD, expressed as a percentage.
% agreement Tier 1		Percent of Tier 1
% agreement Tier 2		Percent of Tier 2
% agreement Tier 3		Percent of Teir 3
Strength of Evidence (SOE)		Relative strength of evidence is indicated by a weighting system in which the total number of studies that have confirmed a symptoms is present/bothersome is multiplied by the average frequency of that symptom to highlight greater evidence in a more commonly occuring symptom/impacts. This can be understood to mean that there is a lot of evidence that this is a substantial issue in early PD. Items…
Frequencey (%) reported as bothersome in early stage PD (Tier 1A)		Percentage of People reporting the the symptom or impact is bothersome at this stage of disease
CONFIDENTIAL Note: Cells with no values or errors resulting from division by "0" are colored with solid grey. To view error - turn off conditional formatting rule for cells with errors. Organization follows the Consensus Conceptual Model of Early PD, with Domains show in dark blue, Categories within each Domain shown in yellow, Concepts within each Category show in light blue, and other items in …		This XL file shows coding presence for all symptoms and impacts in all studies reporting symptoms or impacts of "early PD" for the years 2013-2023. DEFINITION OF EARLY PD: Defined by the source. Generally less than 5-6 years. (Next tab shows <3 yrs only) CODING APPROACH: Where listed, frequencies within the study sample are reported. Where no frequencies were reported, concepts are indicated as h…

## Sheet: <3 years PATIENT PERSPECTIVE
	Refer to footnotes																				SYMPTOMS	MOVEMENT DOMAIN	SLOW MOVEMENTS	Slow movement (Bradykinesia)	FINE MOTOR	Fine motor/dexterity	LOSS OF COORDINATION	Loss of coordination	STIFFNESS	Stiffness/Rigidity/Tightness	Decreased ROM	Flat affect/Facial expression/movements/masked face	Oculomotor changes (incl. blinking, pupilomotor)	WALKING, BALANCE, & POSTURE	Walking & Balance (measured as composite)	Altered balance	Balance & postural instability	Gait changes	Gait changes	Shuffling	Dragging feet	Short step	Altered stance	Altered turning	Double support time	Staggering	Freezing	Slow velocity	Increased velocity
	STATS
	Mean prevalence across unique samples (%)	Mean pevalence across samples (%)																						53.8		84.6667		14		61.6	16.5	18	18.5		56.72		41.2		62.75	11	24	3	#DIV/0!	5	#DIV/0!	#DIV/0!	5.8	#DIV/0!	#DIV/0!
	Mean prevalence in Tier 1B samples	%Tier 1																						46.5		84.6667		14		58	16.5	18	3		62.6667		49.75		62.75	11	24	3	#DIV/0!	5	#DIV/0!	#DIV/0!	8	#DIV/0!	#DIV/0!
	Mean prevalence in Tier 2 sa,mples	%Tier 2																						#DIV/0!		#DIV/0!		#DIV/0!		#DIV/0!	#DIV/0!	#DIV/0!	34		47.8		#DIV/0!		#DIV/0!	#DIV/0!	#DIV/0!	#DIV/0!	#DIV/0!	#DIV/0!	#DIV/0!	#DIV/0!	3.6	#DIV/0!	#DIV/0!
	Mean prevalence in Tier 3 samples	%Tier 3																						83		#DIV/0!		#DIV/0!		76	#DIV/0!	#DIV/0!	#DIV/0!		#DIV/0!		7		#DIV/0!	#DIV/0!	#DIV/0!	#DIV/0!	#DIV/0!	#DIV/0!	#DIV/0!	#DIV/0!	#DIV/0!	#DIV/0!	#DIV/0!
	# Unique Sample Studies reporting	The total number of studies with a unique sample that reported whether the symptom or impact with present or not.																				20	9	11	6	8	3	5	10	10	4	8	5	12	8		10	10	10	3	3	3	2	3	2	2	7	2	2
	#Tier 1	The total number of Tier 1 studies with a unique sample that reported whether the symptom or impact with present or not.																						6		5		3		6	2	6	1		4		6		6	1	1	1	0	1	0	0	3	0	0
	#Tier 2	The total number of Tier 2 studies with a unique sample that reported whether the symptom or impact with present or not.																						0		0		0		0	0	0	1		2		0		0	0	0	0	0	0	0	0	1	0	0
	#Tier 3	The total number of Tier 3 studies with a unique sample that reported whether the symptom or impact with present or not.																						3		1		0		2	0	0	1		0		2		2	0	0	0	0	0	0	0	1	0	0
	# Unique sample studies disconfirming	The number of studies that reported a symptom was not present or was not statistically different from a normative population																						#REF!		#REF!		#REF!		#REF!	#REF!	#REF!	#REF!		#REF!		#REF!		#REF!	#REF!	#REF!	#REF!	#REF!	#REF!	#REF!	#REF!	#REF!	#REF!	#REF!
	#Tier 1	Number in Tier 1																						0		0		0		0	0	0	0		0		0		0	0	0	0	0	0	0	0	0	0	0
	#Tier 2	Number in Tier 2																						0		0		0		0	0	0	0		0		0		0	0	0	0	0	0	0	0	0	0	0
	#Tier 3	Number in Tier 3																						#REF!		#REF!		#REF!		#REF!	#REF!	#REF!	#REF!		#REF!		#REF!		#REF!	#REF!	#REF!	#REF!	#REF!	#REF!	#REF!	#REF!	#REF!	#REF!	#REF!
	Total number of sources confirming	(All measured less disconfirming)																						#REF!		#REF!		#REF!		#REF!	#REF!	#REF!	#REF!		#REF!		#REF!		#REF!	#REF!	#REF!	#REF!	#REF!	#REF!	#REF!	#REF!	#REF!	#REF!	#REF!
	% of Tier 1A/B Sources - Present in early PD	The percent (%) of all Tier 1 sources that indicate that the symptom/impact is present in an early PD population based on unrestricted PwP and family report																				1	1	1	0.833333	0.833333	0.5	0.5	1	1	0.333333	1	0.166667	1	0.666667		1	1	1	0.166667	0.166667	0.166667	0	0.166667	0	0	0.5	0	0
	Tier 1 All (#/7 unique sample studies)	The number of all Tier 1 sources that indicate that the symptom/impact is present in an early PD population based on unrestricted PwP or family member report																				6	6	6	5	5	3	3	6	6	2	6	1	6	4		6	6	6	1	1	1	0	1	0	0	3	0	0
	% of Tier 1A Sources - Bothersome in early PD	The percent (%) of Tier 1A sources that indicate a symptom is actively amoun the most bothersome aspects of early PD based on PwP and family report (does not indicate the prevalance of the symptom as above)																						1		1		0.333333		1	0.333333	1	0		0.666667		1		0.666667	0	0	0	0	0	0	0	0.666667	0	0
	Tier 1A (#/4 unique sample studies)	The number of Tier 1A sources that indicate a symptom is actively among the most bothersome aspects of early PD based on PwP self report (does not indicate the prevalance of the symptom as above)																						3		3		1		3	1	3	0		2		3		2	0	0	0	0	0	0	0	2	0	0
	% of Tier 2 Sources - present	The percent (%) of all Tier 2 sources that indicate that the symptom/impact is present in an early PD population based on a mixture of clinician and some patient/family report via standardized measures (restricted report).																				0.538462	0	0	0	0	0	0	0.0769231	0	0	0	0.0769231	0.153846	0.153846		0	0.0769231	0	0	0	0	0	0	0	0	0.0769231	0	0
	Tier 2 (#/N)	The number of all Tier 2 sources that indicate that the symptom/impact is present in an early PD population based on a mixture of clinician and some patient/family report via standardized measures (restricted report).																				7	0	0	0	0	0	0	1	0	0	0	1	2	2		0	1	0	0	0	0	0	0	0	0	1	0	0
	% of Tier 3 Sources - Present	The percent (%) of all Tier 3 sources that indicate that the symptom/impact is present in an early PD population based on clinician obseration or report without patient or family perspective.																				0.210526	0.157895	#REF!	0.0526316	#REF!	0	#REF!	0.0526316	#REF!	#REF!	#REF!	#REF!	0.0526316	#REF!		#REF!	0.0526316	#REF!	#REF!	#REF!	#REF!	#REF!	#REF!	#REF!	#REF!	#REF!	#REF!	#REF!
	Tier 3 (#/N)	The number of all Tier 3 sources that indicate that the symptom/impact is present in an early PD population based on clinician obseration or report without patient or family perspective.																				4	3	#REF!	1	#REF!	0	#REF!	1	#REF!	#REF!	#REF!	#REF!	1	#REF!		#REF!	1	#REF!	#REF!	#REF!	#REF!	#REF!	#REF!	#REF!	#REF!	#REF!	#REF!	#REF!
	Percent agreement in sources measuring concept	The extent to which all sources agree that the symptom is present in early PD, expressed as a percentage.																						#REF!		#REF!		#REF!		#REF!	#REF!	#REF!	#REF!		#REF!		#REF!		#REF!	#REF!	#REF!	#REF!	#REF!	#REF!	#REF!	#REF!	#REF!	#REF!	#REF!
	% agreement Tier 1	Percent of Tier 1																						1		1		1		1	1	1	1		1		1		1	1	1	1	#DIV/0!	1	#DIV/0!	#DIV/0!	1	#DIV/0!	#DIV/0!
	% agreement Tier 2	Percent of Tier 2																						#DIV/0!		#DIV/0!		#DIV/0!		#DIV/0!	#DIV/0!	#DIV/0!	1		1		#DIV/0!		#DIV/0!	#DIV/0!	#DIV/0!	#DIV/0!	#DIV/0!	#DIV/0!	#DIV/0!	#DIV/0!	1	#DIV/0!	#DIV/0!
	% agreement Tier 3	Percent of Teir 3																						#REF!		#REF!		#REF!		#REF!	#REF!	#REF!	#REF!		#REF!		#REF!		#REF!	#REF!	#REF!	#REF!	#REF!	#REF!	#REF!	#REF!	#REF!	#REF!	#REF!
	Strength of Evidence (SOE)	Relative strength of evidence is indicated by a weighting system in which the total number of studies that have confirmed a symptoms is present/bothersome is multiplied by the average frequency of that symptom to highlight greater evidence in a more commonly occuring symptom/impacts. This can be understood to mean that there is a lot of evidence that this is a substantial issue in early PD. Items…																						#REF!		#REF!		#REF!		#REF!	#REF!	#REF!	#REF!		#REF!		#REF!		#REF!	#REF!	#REF!	#REF!	#REF!	#REF!	#REF!	#REF!	#REF!	#REF!	#REF!
	Frequencey (%) reported as bothersome in early stage PD (Tier 1A)																							0.285833		0.350167		0.1025		0.241667	0.13	0.0285	#DIV/0!		0.2075		0.1985		0.323	#DIV/0!	#DIV/0!	#DIV/0!	#DIV/0!	#DIV/0!	#DIV/0!	#DIV/0!	0.02625	#DIV/0!	#DIV/0!
	DATA													total Unique sample studies			39
	Author	Year	Country	Design	PD DX criteria	Early PD (N)	Sex (M)	White	Age (SD) [Range]	Cohort	Comparison Group	PD Dx Years (SD) [Range]	H&Y (SD)	UPDRS III (SD)	PD Rx (%)	LEDD	Tier	Instruments	Perspective	Source
Ref#	TIER 1A - Frequency reported as most bothersome aspects by Patients (Unrestricted)															N=	3
	PARKINSON'S UK																Tier 1	WEIGHTED ROW				23	1	19.05	1	19.15	1	10.25	2	23.7		1.55		6	22.5		12.65	2	21								3.05
4	Port, et al.	2021	UK	Qualitative	self reported	134	-	-	-	PwP and CG	later PD	<2	-	-	ns	-		Online survey of most bothersome symptoms	PwP and CG	Parkinson's UK				18.7		15.7		15.7		21.6		1.5			12.7		12.7										3
33	Mammen, Tyo, et al.	in review	UK	Qualitative	self reported	124	-	-	-	PwP	-	<2	-		ns			Online survey of most bothersome symptoms	PwP	Parkinson's UK				19.4		22.6		4.8		25.8		1.6			32.3		12.6		21								3.1
33
10	Mammen, Speck et al.	2023	USA	Qualitative	ns	32	0.49	0.925	63.7 (9.0)	PwP	none	1.8 (0.6)	-	-	0.4	-	Tier 1	Cognitive interview, symptom mapping	PwP	WATCH-PD qualitative study				38		47				38	13	6			19		16
32	Lerner et. al	in review	USA	Qualitative	self reported	8536	0.533	0.971	64.6 (10.2)	PD <2 year duration	none	0.9 (0.6)	-	-	-	-	Tier 1	PD-PROP online survey of most bothersome symptoms	PwP - most bothersome	Fox Insight - PD PROP		20	1	28.7	1	38.9	0		2	10.8		1		4			30.9	2	43.6								2.2
34
	DATA
	Author	Year	Country	Design	PD DX criteria	Early PD (N)	Sex (M)	White	Age (SD) [Range]	Cohort	Comparison Group	PD Dx Years (SD) [Range]	H&Y (SD)	UPDRS III (SD)	PD Rx (%)	LEDD	Tier	Instruments	Perspective	Source				-
Ref#	TIER 1B - Prevalence of symptoms and impacts reported by Patients (Unrestricted)															N=	4
10	Mammen, Speck et al.	2023	USA	Qualitative	ns	35	0.49	0.925	63.7 (9.0)	PwP	none	1.8 (0.6)	-	-	0.4	-	Tier 1	Cognitive interview, symptom mapping, survey	PwP	WATCH-PD qualitative study		20	1	75	1	88	0		3	56	28	13		5	75		66	1	59
12	Morel, et al.	2022	Multinational	Qualitative	ns	37	0.4	1	61 (10.4)	PwP and caregivers <2 yrs dx	none	<2 years	-	-	-	-	Tier 1	Cognitive interview, symptom mapping, focus group	PwP	UCB, Parkinson's UK; Parkinson's Foundation		29	1	43	1	71	1	5	4	57	5	27	3	8			49	5	86	11	24	3					8
13	Staunton, et al.	2022	Multinational	Qualitative	ns	35	0.629	NA	65.1 (9.47)	PwP and caregivers	none	0.9 (0.5)	1.2 (0.4)	-	0.11	-	Tier 1	Cognitive interview	PwP, Partners	Roche		17	1	63	0		1	23	2	69		17		4	63		49	1	66
11	Mestre, et al.	pre-pub	Canada	Qualitative	ns	20	0.6	1	67.7 (5)	PwP	Prodromal PD	1.2 0(.7)	-	-	0.5	-	Tier 1	Focus groups, follow up survey	PwP	PPMI interview study		18	1	5	1	95	0		2	50		15		5	50		35	2	40					5
	DATA
	Author	Year	Country	Design	PD DX criteria	Early PD (N)	Sex (M)	White	Age (SD) [Range]	Cohort	Comparison Group	PD Dx Years (SD) [Range]	H&Y (SD)	UPDRS III (SD)	PD Rx (%)	LEDD	Tier	Instruments	Perspective	Source
Ref#	TIER 2: Predominantly Patient Reported outcomes (Restricted data collection)															N=	13
35	Erro, Picillo et al.	2013	Italy	Obs	UKBBC	91	0.61		57.6 (8.5)	ePD (baseline cohort)	later PD	1 (0.5)	-	16.2 (7.4)	0		Tier 2	NMSQuest, UPDRS III	Clinician, CG, Patient	Original		2	0		0		0		0					0				0
36	Picillo, et al.	2014	Italy	Obs	UKBBC	134	0.64	ns	60.5 (9)	ePD (all)	M/F	1 (0.8)	-	16.6 (8.4)	0	-	Tier 2	UPDRS III, NMSQuest	Patient	Original		2	0		0		0		0					0				0
36	Picillo, et al.	2014	Italy	Obs		86	1		60.6 (9.3)	ePD - male cohort	M/F	1 (0.8)	-	16.7 (8.1)	0			UPDRS III, NMSQuest	Patient	Original
36	Picillo, et al.	2014	Italy	Obs		48	0		60.4 (8.5)	ePD - female cohort	M/F	0.92 (0.8)	-	16.6 (8.4)	0			UPDRS III, NMSQuest	Patient	Original
37	Sung, et al.	2014	Korea	Obs		54	0.407		67.1 (10.3)	ePD (all)	none	1.2 (.78)	1.6 (0.4)	14.4 (10.6)	0		Tier 2	SE, UPDRS	Patient, Clinician	Original		0	0		0		0		0					0				0
38	Yang, et al.	2014	Korea	Obs		56	0.5		64 (8.5)	ePD (all)	de novo PD	1.6 (0.9)	2 (0.7)	-	ns		Tier 2	SS	Clinician, Patient	Original		1	0		0		0		0					0				0
39
40	Stankovic, et al.	2019	Serbia	Longitudinal	UKBBC	107	0.551	ns	61.5 (9.6)	de novo PD (baseline cohort)	HC, later PD	0	1	16.0 (4.6)	ns	216 (200)	Tier 2	SCOPA-AUT, MDS-UPDRS, ACE-R, MMSE, HADRS, HARS, ARS	Clinician, Patient	Original		0	0		0		0		0					0				0
41	Bhidayarsiri, et al.	2020	Thailand	Survey	ns	222	0.563	ns	68 (10.8)	ePD	later PD	ns	1	-	-	-	Tier 2	Parkinson’s Disease Patients’ Concerns (PDPC Survey) - Thai	PwP	Original		4	0		0		0		0					1	66			0
42
43	Siciliano, et al.	2020	Italy	Longitudinal	MDS	55	0.58	ns	64.5 (7.8)	de novo PD (baseline cohort)	later PD	<2	1.7 (0.5)	21 (8.8)	0	N/A	Tier 2	BDI, ESS, PFS, AES, MoCA, MDS-UPDRS, PAS, MCST, BLOT, TMT, Digit span	Clinician, Patient	Original		0	0		0		0		0					0				0
44
45	Tosin, et al.	2022	USA	Secondary	ns	331	0.72	ns	62.4 (9)	ePD (baseline cohort)	later PD	0.8 (0.7)	2 [0-3]	25.4 (10.4)	0	N/A	Tier 2	MDS-UPDRS	Clinician, Patient	STEADY-PD		6	0		0		0		0					2	29.6			1									3.6
46
47	Malek, et al.	2017	UK	Prospective	UKBBC	855	0.651		66.1 (9.2)	ePD - H&Y stage 1	later PD	1.2 (0.9)	1	16.8 (8.8)	0.903	264 (208)	Tier 2	ESS, LADS, MoCA, PDQ-39, NMSS, UPSIT, SCOPA-AUT, MDS-UPDRS	Clinician, Patient	Tracking PD Study		0	0		0		0		0					0				0
48
48
48
49
	ICICLE-PD SAMPLE	.	.	.	.	.	.	.	.	.	.	.	.	.	.	.	Tier 2	WEIGHTED ROW		ICICLE-PD		3	0		0		0		0					0				0
50	Durcan, et al.	2019	UK	Secondary	UKBBC	154	0.649	ns	66.4 (10.4)	ePD (all)	Gender	0.5 (0.3-0.7)	2 (0.7)	26.9 (12.1)		203 (138)		GDS, MDS-UPDRS, MMSE, MoCA, NMSQuest	Clinician, Patient	ICICLE-PD
51	Dlay, et al.	2020	UK	Prospective	UKBBC	162	0.642	ns	66.2 (10.1)	ePD (baseline cohort)	HC, later PD	0.5 (0.4)	1.9 (0.7)	27 (12.1)	ns	190 (160)		PDQ-39, MDS-UPDRS, NPI, NPI-D, GDS, MoCA	Clinician, Patient	ICICLE-PD
52	Naisby, et al.	2021	UK	Prospective	UKBBC	154	0.643	ns	67 (10.4)	de novo PD (baseline cohort)	HC, later PD	0	20%>2	27 (12.1)	ns	178 (148)		GDS, MDS-UPDRS, MMSE, MoCA, NMSQuest	Patient	ICICLE-PD
	NORWEGIAN PARKWEST SAMPLE		.	.	.	.	.	.	.	.	.	.	.	.	.	.	Tier 2	WEIGHTED ROW		Norwegian ParkWest		0	0		0		0		0					0				0
53	Tholfsen, et al.	2017	Norway	Longitudinal	UKBBC	182	0.478	1	67.5 (9.2 )	de novo PD (baseline cohort)	HC, later PD	0	ns	26.1 (13.1)	0	N/A		ESS, MADRS, MMSE, PDSS, PIGD, UPDRS	Clinician, Patient	Norwegian ParkWest
54	Ongre, et al.	2017	Norway	Prospective	UKBBC	181	0.608	1	67.3 (9.3)	de novo PD (all)	HC, later PD	0	1.9 (0.62)	22.8 (10.8)	0	N/A		FSS, ESS, PDSS, MMSE, UPDRS, SAS	Clinician, Patient	Norwegian ParkWest
55
55
55
	OPDC SAMPLE	.	.	.	.	.	.	.	.	.	.	.	.	.	.	.	Tier 2	WEIGHTED ROW				0	0		0		0		0					0				0
56
56
56
57
58	Baig, et al.	2019	UK	Prospective	UKBBC	921	0.651	0.978	67 (9.2)	ePD (all)	ICB	1 [0.4-2.4]	92%≤2	26.4 (10.7)	0.88	321 (193)		MDS-UPDRS, QUIP, RBDSQ, PICS	Clinician, Patient	OPDC
59
59
59
	PPMI SAMPLE	.	.	.	.	.	.	.	.	.	.	.	.	.	.	.	Tier 2	WEIGHTED ROW				3	0		0		0		1				34	0				0
60	Simuni, et al.	2018	Multinational	Secondary	PPMI	423	0.65	0.924	61.7 (9.7)	de novo PD (all)	HC, later PD	.5 (.5)	1.6 (0.5)	20.4 (9)	0	N/A		SCOPA-AUT, MoCA, STAI, ESS, RBDSQ, QUIP, UPSIT, MDS-UPDRS, GDS	Clinician, Patient	PPMI
61	Martinez-Ramirez, et al.	2020	Multinational	Secondary	PPMI	414	0.662	0.925	61.6 (9.7)	ePD (all)	SCOPA>10	0.6 (0.6)	1.6 (0.5)	20.9 (8.9)	0	N/A		ESS, GDS, MDS-UPDRS, MoCA, QUIP, RBDSQ, UPSIT, SCOPA-AUT	Clinician, Patient	PPMI													34
46	Paracha, et al.	2022	Multinational	Secondary	PPMI	416	0.65	0.93	61.6 (9.7)	ePD (PPMI cohort)	HC; Fox Insight	0.5 (0.5)	ns	ns	ns	ns		SCOPA-AUT, UPSIT, MDS-UPDRS, RBDSQ	Patient, Clinician	PPMI
	DATA
	Author	Year	Country	Design	PD DX criteria	Early PD (N)	Sex (M)	White	Age (SD) [Range]	Cohort	Comparison Group	PD Dx Years (SD) [Range]	H&Y (SD)	UPDRS III (SD)	PD Rx (%)	LEDD	Tier	Instruments	Perspective	Source
Ref#	TIER 3: Predominantly Clinician or Observer Reported Outcomes															N=	19
62
63	Diederich, et al.	2013	Germany	Obs	ns	33	0.57		65.5 (11.6)	ePD (all)	HC	1.9 (0.3)	2 (.5)	-	-	-	Tier 3	Polysomnography	DHT	Original		0	0		0		0		0					0				0
64
65
66	Pellicano, et al.	2014	Italy	Prospective	ns	84	0.62		63 (9.4)	ePD (all)	HC	1(.9)	1.6(0.5)	15.1 (8.6)	0	-	Tier 3	ARS, BDI, HADRS, HARS, UPDRS, VF, WCST-SF, SCWT, Rey's Recall	Clinician	Original		0	0		0		0		0					0				0
66	Pellicano, et al.	2014	Italy	Prospective	ns	42	0.619		63.6 (8)	ePD (R sided PD cohort)	HC	0.9 (0.9)	1.6 (0.5)	15.1 (8.9)	0	-		ARS, BDI, HADRS, HARS, UPDRS, VF, WCST-SF, SCWT, Rey's Recall	Clinician	Original
66	Pellicano, et al.	2014	Italy	Prospective	ns	42	0.619		63 (10.7)	ePD (L sided PD cohort)	HC	1.1 (0.8)	1.5 (0.5)	15.1 (8.3)	0	-		ARS, BDI, HADRS, HARS, UPDRS, VF, WCST-SF, SCWT, Rey's Recall	Clinician	Original
67
68	Santangelo, et al.	2015	Italy	Prospective	UKBBC	75	0.6		61.6 (8.6)	de novo PD (all)	none	<2	1.8 (0.5)	13.8 (6.9)	0	-	Tier 3	BLOT, CAT, UPDRS, TMT, AES	Clinician	Original		0	0		0		0		0					0				0
69	Zucco, et al.	2015	Italy	Prospective	ns	12	0.5		65.3 (4.8)	ePD (all)	HC	2.25 (ns)	1-1.5	ns	1	-	Tier 3	None	Observer	Original		0	0		0		0		0					0				0
70	Adwani, et al.	2016	India	Prospective	UKBBC	50	0.74		52.2 (8)	ePD (all)	laterality; HC	2.3 (1.3)	ns	15.1 (7.1)	1	-	Tier 3	NIMHANS, MMSE, UPDRS III	Clinician	Original		0	0		0		0		0					0				0
71
72
73	Podgorny, et al.	2016	Canada	Prospective	UKBBC	26	0.58	ns	63 [42-78]	ePD (all)	HC	.9 [0-4]	ns	ns	0.04	ns	Tier 3	UENS	Clinician	Original		0	0		0		0		0					0				0
74
75	Stankovic, et al.	2016	Serbia	Prospective	UKBBC	111	0.541		61.4 (9.6)	de novo PD (all)	HC	<2	1	16 (4.7)	0.64	ns	Tier 3	ACE-R, HARS, HADRS, MDS-UPDRS, NPI, SCOPA-PC	Clinician	Original		1	0		0		0		0					0				0
76	Zhang, et al.	2016	China	Prospective	UKBBC	248	0.452		65.9	ePD (all)	later PD	1 (0.16)	≤2	19.2 (2.6)	>50	ns	Tier 3	HARS, HADS, UPDRS III, NMSS	Clinician	Original		2	0		0		0		0					1				1									16*
77
78	Mollenhauer, et al.	2019	Germany	Prospective	UKBBC	135	0.65	ns	64.5 (9.8)	de novo PD (baseline cohort)	later PD	<.5	ns	22.8 (12)	ns	ns	Tier 3	MDS-UPDRS, GDS, NMSQuest, MMSE, PDQ-39	Clinician	Original		0	0		0		0		0					0				0
79
80	Diederich, et al.	2020	Luxembourg	Prospective	UKBBC	64	0.58	ns	64.2 (11.6)	ePD (all)	HC	<3	ns	9.2 (5.2)	ns	177 (276)	Tier 3	FAB, BDI, SCOPA-AUT, MMSE, UPDRS, UPSIT, BADS, VOSP, NMSQuest, TMT, PDSS	Clinician	Original		0	0		0		0		0					0				0
81
82
83	Moguel-Cobos, et al.	2020	USA	Secondary	ns	41	0.439	ns	67.2 (9.2)	ePD (all)	none	<5	ns	ns	0.8	ns	Tier 3	LSAS, UPDRS	Clinician	Original		0	0		0		0		0					0				0
84
85
86
87	Picillo, et al.	2021	Italy	Secondary	ns	385	0.641	ns	ns	ePD (all)	M/F, Age	ns	≤ 2	ns	ns	ns	Tier 3	UPDRS, MMSE, PDQ-39, EQ-VAS, HADS, HARS	Clinician	PRIAMO		0	0		0		0		0					0				0
88	Eriksson, et al.	2022	Sweden	Prospective	UKBBC	33	0.545	ns	63.5 (9.5)	ePD (all)	HC	ns	1.6 (0.8)	17.3 (10.5)	1	545 (307)	Tier 3	Emotion Survey, BDI, FAB, MoCA, MDS-UPDRS III	Clinician	Original		0	0		0		0		0					0				0
89
90
91
92
93	Adams, et al.	2023	USA	Prospective	Study	82	0.56	0.95	63.3 (9.4)	ePD (all)	HC	0.8 (0.6)	≤2	24.1 (10.2)	0	N/A	Tier 3	DHT, DaTscan, MoCA, MMSE, MDS-UPDRS, ESS, GDS, RBDSQ, SCOPA-AUT, PDQ-39	Clinician Observer	WATCH-PD		2	1	+	1	+	0		0					0				0
94	Zhou, et al.	2022	China	Cross sectional	MDS	75	0.533	ns	64.5 (8.1)	de novo PD (baseline cohort)	HC	1 [0.5-2]	50%≤2	19 (13-29)	0	N/A	Tier 3	Video observation, SS, MoCA, MDS-UPDRS, HADS, MMSE, TETRAS, RBDSQ, NMSQuest	Clinician Observer	Shanghai University		1	0		0		0		1				+	0				0
	NORWEGIAN PARKWEST SAMPLE		.	.	.	.	.	.	.	.	.	.	.	.	.	.	Tier 3	WEIGHTED ROW				5	1	-	0		0		1	+				2			+	1	+
95
96	Tholfsen, et al.	2015	Norway	Prospective	UKBBC	153	0.607		66.5 (8.9)	incident PD - baseline cohort	later PD	incident	ns	21.4 (9.4)				ESS, MMSE, MADRS, UPDRS	Clinician	Norwegian ParkWest
97	Larsen, et al.	2017	Norway	Prospective	UKBBC	187	0.6		67.8 (9.3)	de novo PD (all)	HC, later PD	0	ns	23.3 (11.3)	0.02	0		MADRS, UPDRS, MMSE, SE, CCI	Clinician	Norwegian ParkWest
98	Muller, et al.	2013a	Norway	Prospective	UKBBC	166	-		67.7 (9.3)	ePD baseline cohort	later PD	-	1.9 (0.6)	23.2 (11.1)	0			ESS, FSS, MADRS, MMSE, SAS, SF-36, UPDRS I-IV	Clinician	Norwegian ParkWest				-						+							+		+
99
99
99
	ICICLE-PD SAMPLE	.	.	.	.	.	.	.	.	.	.	.	.	.	.	.	Tier 3	WEIGHTED ROW				2	0		0		0		0					1				1	+
100	Lord, et al.	2013	England	Obs	UKBBC	122	0.672		67 (10.5)	de novo PD (all)	HC	-	1.9 (0.63)	25.4 (11.1)	ns			GDS, MMSE, UPDRS III	Clinician	ICICLE-PD																			+
101	Morris, et al.	2017	England	Longitudinal	UKBBC	119	0.664		66.1 (9.9)	ePD (all)	HC, later PD	0.5 (0.4)	1.9 (0.64)	25 (10.4)	ns	172 (129)		NART, FOG, GDS, MMSE, MDS-UPDRS	Clinician	ICICLE-PD
	PALS SAMPLE	.	.	.	.	.	.	.	.	.	.	.	.	.	.	.	Tier 3	WEIGHTED ROW				0	0		0		0		0					0				0
102	Huang, et al.	2018	Singaporte	Prospective	NINDS	125	0.75	Chinese	64.5 (9)	ePD (all)	PD Phenotype	0.4 (0.3)	1.9 (0.3)	21.3 (10.1)		210.6 (152.3)		MDS-UPDRS, HADS, HARS, NMSS, PSQI, RBDSQ, FSS	Clinician	PALS
103	Chua, et al.	2021	Singapore	Prospective	NINDS	121	0.643	ns	66.7 [60-72]	ePD (all)	none	1 [0.8-1.5]	ns	18 [14-25]	ns	[50-375]		AES, ADAS-Cog, FFT, BNT, WAIS, WMS, RBANS, ROCF, MoCA, MMSE, MDS-UPDRS, BLOT, HADS, GDS	Clinician	PALS
104	Koh, et al.	2022	Singapore	Longitudinal	NINDS	109	0.625	ns	66 (9.1)	ePD (all)	none	0.5 (0.4)	1.9 (0.4)	20.3 (9.7)	ns	227 (179)		AES, ADAS-Cog, FFT, BNT, WAIS, WMS, RBANS, ROCF, MoCA, MMSE, MDS-UPDRS, BLOT, HADS, GDS	Clinician	PALS
	PPMI SAMPLE		.	.	.	.	.	.	.	.	.	.	.	.	.	.	Tier 3	WEIGHTED ROW				8	1	83	0		0		1	76				1			7	0
105	Liu, et al.	2015	USA	Secondary	PPMI	414	0.65	0.92	61.7 (9.7)	ePD (all)	HC	0.6 (0.6)	≤2	20.9 (8.9)	0	N/A		ESS, MoCA, QUIP, RBDSQ, GDS, SCOPA, DaTscan, UPDRS	Clinician	PPMI				82.9						76.1
105	Liu, et al.	2015	USA	Secondary	PPMI	269	1		62.1 (9.8)	ePD - male cohort	HC	0.5 (0.5)	2	21 (9)	0			ESS, MoCA, QUIP, RBDSQ, GDS, SCOPA, DaTscan, UPDRS	Clinician	PPMI				84						80.2							7
105	Liu, et al.	2015	USA	Secondary	PPMI	145	0		60.6 (9.6)	ePD - female cohort	HC	0.6 (0.6)	2	20.3 (8.4)	0			ESS, MoCA, QUIP, RBDSQ, GDS, SCOPA, DaTscan, UPDRS	Clinician	PPMI				81.3						69.4							7
106	Simuni, et al.	2015	USA	Secondary	PPMI	423	0.65	0.92	61.7 (9.7)	de novo PD (baseline cohort)	HC, later PD	0.6 (0.6)	≤2	20.9 (8.9)	0	N/A		ESS, MDS-UPDRS, SE, MoCA, GDS, STAI, QUIP, RBDSQ, DaTscan	Clinician	PPMI
107	Amara, et al.	2017	USA	Secondary	PPMI	423	0.65	0.924	61.7 (9.7)	ePD (baseline cohort)	HC, later PD	0.6 (0.6)	≤2	20.9 (8.9)	0	N/A		ESS, MDS-UPDRS, SE, MoCA, GDS, STAI, QUIP, RBDSQ, DaTscan, SCOPA	Clinician	PPMI
108	Labelle, et al.	2017	USA	Secondary	PPMI	424	0.66	0.924	61.7 (9.7)	de novo PD (all)	Latent class	.5 (.5)	1.6 (0.5)	20.4 (9)	0	N/A		HVLT, BLOT, SDMT, MDS-UPDRS, CSF biomarkers, ESS, GDS, SCOPA, UPSIT	Clinician	PPMI				82.9						76.7							6.9
109	Serra, et al.	2018	Multinational	Secondary	PPMI	423	0.65	0.924	61.7 (9.7)	de novo PD (all)	HC	.5 (.5)	1.6 (0.5)	20.4 (9)	0	N/A		SCOPA-AUT, MoCA, DaTscan	Clinician	PPMI
110
111	Dijkstra, et al.	2022	Multinational	Secondary	PPMI	421	0.65	0.924	61.7 (9.7)	de novo PD (all)	Prodromal PD	0.6 (0.6)	≤2	20.9 (8.9)	0	N/A		ESS, GDS, MDS-UPDRS, MoCA, QUIP, RBDSQ, UPSIT, SCOPA-AUT, STAI	Clinician	PPMI
112	Hemphill, et al.	2023	Multinational	Secondary	PPMI	487	0.651	0.928	61 (9.7)	ePD (all)	later PD	ns	ns	20 (9.2)	ns	ns		LNS, BLOT, SDMT, HVLT, MoCA, MDS-UPDRS III, GDS	Clinician	PPMI
113
114
	FOOTNOTES
	CONFIDENTIAL Note: Cells with no values or errors resulting from division by "0" are colored with solid grey. To view error - turn off conditional formatting rule for cells with errors. Organization follows the Consensus Conceptual Model of Early PD, with Domains show in dark blue, Categories within each Domain shown in yellow, Concepts within each Category show in light blue, and other items in …	This XL file shows coding presence for all symptoms and impacts in all studies reporting symptoms or impacts of "early PD" for the years 2013-2023. DEFINITION OF EARLY PD: Defined by the source. Generally less than 5-6 years. (Next tab shows <3 yrs only) CODING APPROACH: Where listed, frequencies within the study sample are reported. Where no frequencies were reported, concepts are indicated as h…
[truncated: 318 more columns]

## Sheet: ALL DATA FULL REVIEW (0-6 YEAR)
	Refer to footnotes																				SYMPTOMS	MOVEMENT DOMAIN	SLOW MOVEMENTS	Slow movement (Bradykinesia)	FINE MOTOR	Fine motor/dexterity	LOSS OF COORDINATION	Loss of coordination	STIFFNESS	Stiffness/Rigidity/Tightness	Decreased ROM	Flat affect/Facial expression/movements/masked face	Oculomotor changes (incl. blinking, pupilomotor)	WALKING, BALANCE, & POSTURE	Walking & Balance (measured as composite)	Altered balance	Balance & postural instability	Gait changes	Gait changes	Shuffling	Dragging feet	Short step	Altered stance	Altered turning	Double support time	Staggering	Freezing	Slow velocity	Increased velocity
	STATS
	Mean prevalence across unique samples (%)	Mean pevalence across samples (%)																						60.2167		84.6667		14		64.4167	16.5	20.3	18.5		58.9571		33.5171		62.75	25.145	24	30.07	23.21	13.215	#DIV/0!	10.7	11.4	42.86	3.57
	Mean prevalence in Tier 1B samples	%Tier 1																						46.5		84.6667		14		58	16.5	18	3		62.6667		49.75		62.75	11	24	3	#DIV/0!	5	#DIV/0!	#DIV/0!	8	#DIV/0!	#DIV/0!
	Mean prevalence in Tier 2 sa,mples	%Tier 2																						92.3		#DIV/0!		#DIV/0!		78.5	#DIV/0!	24.9	34		56.175		18		#DIV/0!	#DIV/0!	#DIV/0!	#DIV/0!	#DIV/0!	#DIV/0!	#DIV/0!	#DIV/0!	12.5333	#DIV/0!	#DIV/0!
	Mean prevalence in Tier 3 samples	%Tier 3																						83		#DIV/0!		#DIV/0!		76	#DIV/0!	#DIV/0!	#DIV/0!		#DIV/0!		8.81		#DIV/0!	39.29	#DIV/0!	57.14	23.21	21.43	#DIV/0!	10.7	#DIV/0!	42.86	3.57
	# Unique Sample Studies reporting	The total number of studies with a unique sample that reported whether the symptom or impact with present or not.																				31	11	11	6	6	3	3	14	10	2	8	3	19	8		10	16	9	2	1	3	1	2	1	1	8	2	1
	#Tier 1	The total number of Tier 1 studies with a unique sample that reported whether the symptom or impact with present or not.																						7		5		3		7	2	6	1		4		6		6	1	1	1	0	1	0	0	4	0	0
	#Tier 2	The total number of Tier 2 studies with a unique sample that reported whether the symptom or impact with present or not.																						1		0		0		1	0	2	1		4		1		0	0	0	0	0	0	0	0	3	0	0
	#Tier 3	The total number of Tier 3 studies with a unique sample that reported whether the symptom or impact with present or not.																						3		1		0		2	0	0	1		0		3		3	1	0	2	1	1	1	1	1	2	1
	# Unique sample studies disconfirming	The number of studies that reported a symptom was not present or was not statistically different from a normative population																						0		0		0		0	0	0	0		0		0		0	0	0	1	0	0	0	0	0	1	0
	#Tier 1	Number in Tier 1																						0		0		0		0	0	0	0		0		0		0	0	0	0	0	0	0	0	0	0	0
	#Tier 2	Number in Tier 2																						0		0		0		0	0	0	0		0		0		0	0	0	0	0	0	0	0	0	0	0
	#Tier 3	Number in Tier 3																						0		0		0		0	0	0	0		0		0		0	0	0	1	0	0	0	0	0	1	0
	Total number of sources confirming	(All measured less disconfirming)																						11		6		3		10	2	8	3		8		10		9	2	1	2	1	2	1	1	8	1	1
	% of Tier 1A/B Sources - Present in early PD	The percent (%) of all Tier 1 sources that indicate that the symptom/impact is present in an early PD population based on unrestricted PwP and family report																				1	1	1	0.714286	0.714286	0.428571	0.428571	1	1	0.285714	0.857143	0.142857	1	0.571429		0.857143	1	0.857143	0.142857	0.142857	0.142857	0	0.142857	0	0	0.571429	0	0
	Tier 1 All (#/7 unique sample studies)	The number of all Tier 1 sources that indicate that the symptom/impact is present in an early PD population based on unrestricted PwP or family member report																				7	7	7	5	5	3	3	7	7	2	6	1	7	4		6	7	6	1	1	1	0	1	0	0	4	0	0
	% of Tier 1A Sources - Bothersome in early PD	The percent (%) of Tier 1A sources that indicate a symptom is actively amoun the most bothersome aspects of early PD based on PwP and family report (does not indicate the prevalance of the symptom as above)																						1		0.75		0.25		1	0.25	0.75	0		0.5		0.75		0.5	0	0	0	0	0	0	0	0.75	0	0
	Tier 1A (#/4 unique sample studies)	The number of Tier 1A sources that indicate a symptom is actively among the most bothersome aspects of early PD based on PwP self report (does not indicate the prevalance of the symptom as above)																						4		3		1		4	1	3	0		2		3		2	0	0	0	0	0	0	0	3	0	0
	% of Tier 2 Sources - present	The percent (%) of all Tier 2 sources that indicate that the symptom/impact is present in an early PD population based on a mixture of clinician and some patient/family report via standardized measures (restricted report).																				0.684211	0.0526316	0.0526316	0	0	0	0	0.210526	0.0526316	0	0.105263	0.0526316	0.263158	0.210526		0.0526316	0.157895	0	0	0	0	0	0	0	0	0.157895	0	0
	Tier 2 (#/N)	The number of all Tier 2 sources that indicate that the symptom/impact is present in an early PD population based on a mixture of clinician and some patient/family report via standardized measures (restricted report).																				13	1	1	0	0	0	0	4	1	0	2	1	5	4		1	3	0	0	0	0	0	0	0	0	3	0	0
	% of Tier 3 Sources - Present	The percent (%) of all Tier 3 sources that indicate that the symptom/impact is present in an early PD population based on clinician obseration or report without patient or family perspective.																				0.205128	0.0769231	0.0769231	0.025641	0.025641	0	0	0.025641	0.0512821	0	0	0.025641	0.102564	0		0.0769231	0.102564	0.0769231	0.025641	0	0.025641	0.025641	0.025641	0.025641	0.025641	0.025641	0.025641	0.025641
	Tier 3 (#/N)	The number of all Tier 3 sources that indicate that the symptom/impact is present in an early PD population based on clinician obseration or report without patient or family perspective.																				8	3	3	1	1	0	0	1	2	0	0	1	4	0		3	4	3	1	0	1	1	1	1	1	1	1	1
	Percent agreement in sources measuring concept	The extent to which all sources agree that the symptom is present in early PD, expressed as a percentage.																						1		1		1		1	1	1	1		1		1		1	1	1	0.666667	1	1	1	1	1	0.5	1
	% agreement Tier 1	Percent of Tier 1																						1		1		1		1	1	1	1		1		1		1	1	1	1	#DIV/0!	1	#DIV/0!	#DIV/0!	1	#DIV/0!	#DIV/0!
	% agreement Tier 2	Percent of Tier 2																						1		#DIV/0!		#DIV/0!		1	#DIV/0!	1	1		1		1		#DIV/0!	#DIV/0!	#DIV/0!	#DIV/0!	#DIV/0!	#DIV/0!	#DIV/0!	#DIV/0!	1	#DIV/0!	#DIV/0!
	% agreement Tier 3	Percent of Teir 3																						1		1		#DIV/0!		1	#DIV/0!	#DIV/0!	1		#DIV/0!		1		1	1	#DIV/0!	0.5	1	1	1	1	1	0.5	1
	Strength of Evidence (SOE)	Relative strength of evidence is indicated by a weighting system in which the total number of studies that have confirmed a symptoms is present/bothersome is multiplied by the average frequency of that symptom to highlight greater evidence in a more commonly occuring symptom/impacts. This can be understood to mean that there is a lot of evidence that this is a substantial issue in early PD. Items…																						662.383		508		42		644.167	33	162.4	55.5		471.657		335.171		564.75	50.29	24	60.14	23.21	26.43	#DIV/0!	10.7	91.2	42.86	3.57
	Frequencey (%) reported as bothersome in early stage PD (Tier 1A)																							0.334583		0.34		0.1025		0.278583	0.13	0.0656667	#DIV/0!		0.22		0.206667		0.2955	#DIV/0!	#DIV/0!	#DIV/0!	#DIV/0!	#DIV/0!	#DIV/0!	#DIV/0!	0.0281667	#DIV/0!	#DIV/0!
	DATA													total Unique sample studies			65
	Author	Year	Country	Design	PD DX criteria	Early PD (N)	Sex (M)	White	Age (SD) [Range]	Cohort	Comparison Group	PD Dx Years (SD) [Range]	H&Y (SD)	UPDRS III (SD)	PD Rx (%)	LEDD	Tier	Instruments	Perspective	Source
Ref#	TIER 1A - Frequency reported as most bothersome aspects by Patients (Unrestricted)															N=	4
	PARKINSON'S UK																Tier 1	WEIGHTED ROW				23	1	16.0333	1	16.1	1	10.25	2	19.1333		12.7		6	25		15.1	2	15.5								3.05
4	Port, et al.	2021	UK	Qualitative	self reported	134	-	-	-	PwP and CG	later PD	<2	-	-	ns	-		Online survey of most bothersome symptoms	PwP and CG	Parkinson's UK				18.7		15.7		15.7		21.6		1.5			12.7		12.7										3
33	Mammen, Tyo, et al.	in review	UK	Qualitative	self reported	124	-	-	-	PwP	-	<2	-		ns			Online survey of most bothersome symptoms	PwP	Parkinson's UK				19.4		22.6		4.8		25.8		1.6			32.3		12.6		21								3.1
33	Mammen, Tyo, et al.	in review	UK	Qualitative	self reported	10	-	-	-	Caregiver	-	<2	-	-	ns	-		Online survey of most bothersome symptoms	Family and caregivers	Parkinson's UK				10		10		-		10		-			30		20		10								-
10	Mammen, Speck et al.	2023	USA	Qualitative	ns	32	0.49	0.925	63.7 (9.0)	PwP	none	1.8 (0.6)	-	-	0.4	-	Tier 1	Cognitive interview, symptom mapping	PwP	WATCH-PD qualitative study				38		47				38	13	6			19		16
32	Lerner et al.	in review	USA	Qualitative	self reported	8536	0.533	0.971	64.6 (10.2)	PD <2 year duration	none	0.9 (0.6)	-	-	-	-	Tier 1	PD-PROP online survey of most bothersome symptoms	PwP - most bothersome	Fox Insight - PD PROP		20	1	28.7	1	38.9	0		2	10.8		1		4			30.9	2	43.6								2.2
34	Politis, et al.	2010	UK	Prospective	UKBBC	265		-	65.3 (10.4)	ePD	later PD	<6	2 [1-3]	-	-	402 (204)	Tier 1	Clinical interview? (not clearly stated)	PwP			11	1	51.1	0		0		1	43.5				1				1									3.2
	DATA
	Author	Year	Country	Design	PD DX criteria	Early PD (N)	Sex (M)	White	Age (SD) [Range]	Cohort	Comparison Group	PD Dx Years (SD) [Range]	H&Y (SD)	UPDRS III (SD)	PD Rx (%)	LEDD	Tier	Instruments	Perspective	Source				-
Ref#	TIER 1B - Prevalence of symptoms and impacts reported by Patients (Unrestricted)															N=	4
10	Mammen, Speck et al.	2023	USA	Qualitative	ns	35	0.49	0.925	63.7 (9.0)	PwP	none	1.8 (0.6)	-	-	0.4	-	Tier 1	Cognitive interview, symptom mapping, survey	PwP	WATCH-PD qualitative study		20	1	75	1	88	0		3	56	28	13		5	75		66	1	59
12	Morel, et al.	2022	Multinational	Qualitative	ns	37	0.4	1	61 (10.4)	PwP and caregivers <2 yrs dx	none	<2 years	-	-	-	-	Tier 1	Cognitive interview, symptom mapping, focus group	PwP	UCB, Parkinson's UK, Parkinson's Foundation		29	1	43	1	71	1	5	4	57	5	27	3	8			49	5	86	11	24	3					8
13	Staunton, et al.	2022	Multinational	Qualitative	ns	35	0.629	NA	65.1 (9.47)	PwP and caregivers	none	0.9 (0.5)	1.2 (0.4)	-	0.11	-	Tier 1	Cognitive interview	PwP, Partners	Roche		17	1	63	0		1	23	2	69		17		4	63		49	1	66
11	Mestre, et al.	in press	Canada	Qualitative	ns	20	0.6	1	67.7 (5)	PwP	Prodromal PD	1.2 0(.7)	-	-	0.5	-	Tier 1	Focus groups, follow up survey	PwP	PPMI interview study		18	1	5	1	95	0		2	50		15		5	50		35	2	40					5
	DATA
	Author	Year	Country	Design	PD DX criteria	Early PD (N)	Sex (M)	White	Age (SD) [Range]	Cohort	Comparison Group	PD Dx Years (SD) [Range]	H&Y (SD)	UPDRS III (SD)	PD Rx (%)	LEDD	Tier	Instruments	Perspective	Source
Ref#	TIER 2: Predominantly Patient Reported outcomes (Restricted data collection)															N=	19
35	Erro, Picillo et al.	2013	Italy	Obs	UKBBC	91	0.61		57.6 (8.5)	ePD (baseline cohort)	later PD	1 (0.5)	-	16.2 (7.4)	0		Tier 2	NMSQuest, UPDRS III	Clinician, CG, Patient	Original		2	0		0		0		0					0				0
36	Picillo, et al.	2014	Italy	Obs	UKBBC	134	0.64	ns	60.5 (9)	ePD (all)	M/F	1 (0.8)	-	16.6 (8.4)	0	-	Tier 2	UPDRS III, NMSQuest	Patient	Original		2	0		0		0		0					0				0
36	Picillo, et al.	2014	Italy	Obs		86	1		60.6 (9.3)	ePD - male cohort	M/F	1 (0.8)	-	16.7 (8.1)	0			UPDRS III, NMSQuest	Patient	Original
36	Picillo, et al.	2014	Italy	Obs		48	0		60.4 (8.5)	ePD - female cohort	M/F	0.92 (0.8)	-	16.6 (8.4)	0			UPDRS III, NMSQuest	Patient	Original
37	Sung, et al.	2014	Korea	Obs		54	0.407		67.1 (10.3)	ePD (all)	none	1.2 (.78)	1.6 (0.4)	14.4 (10.6)	0		Tier 2	SE, UPDRS	Patient, Clinician	Original		0	0		0		0		0					0				0
38	Yang, et al.	2014	Korea	Obs		56	0.5		64 (8.5)	ePD (all)	de novo PD	1.6 (0.9)	2 (0.7)	-	ns		Tier 2	SS	Clinician, Patient	Original		1	0		0		0		0					0				0
39	Wu,Guo, et al.	2016	China	Cross sectional	UKBBC	301	0.548		58.4 (10.9)	ePD (all)	HC	2.1 (1.3)	1.9 (0.5)	22.3 (10.3)	0.621	219 (167)	Tier 2	MDS-UPDRS, NMSQuest, HADRS, HADS, ACE-R, MMSE, PDQ-39	Clinician, Patient	Original		4	0		0		0		1			24.9		0				0
40	Stankovic, et al.	2019	Serbia	Longitudinal	UKBBC	107	0.551	ns	61.5 (9.6)	de novo PD (baseline cohort)	HC, later PD	0	1	16.0 (4.6)	ns	216 (200)	Tier 2	SCOPA-AUT, MDS-UPDRS, ACE-R, MMSE, HADRS, HARS, ARS	Clinician, Patient	Original		0	0		0		0		0					0				0
41	Bhidayarsiri, et al.	2020	Thailand	Survey	ns	222	0.563	ns	68 (10.8)	ePD	later PD	ns	1	-	-	-	Tier 2	Parkinson’s Disease Patients’ Concerns (PDPC Survey) - Thai	PwP	Original		4	0		0		0		0					1	66			0
42	Santos-Garcia, et al.	2020	Spain	Prospective	ns	321	0.579	ns	62 (9.1)	ePD without motor fluctuation	later PD	2.6 (1.5)	1.7 (0.5)	19.6 (9.8)		419 (315)	Tier 2	BDI, VAFS, VAS-Pain, PD-CRS, FOG, PDSS, NMSS, NPI, QUIP, UPDRS, EUROHIS-QOL8, SE	Clinician, Patient	COPPADIS		3	0		0		0		0					0				0
43	Siciliano, et al.	2020	Italy	Longitudinal	MDS	55	0.58	ns	64.5 (7.8)	de novo PD (baseline cohort)	later PD	<2	1.7 (0.5)	21 (8.8)	0	N/A	Tier 2	BDI, ESS, PFS, AES, MoCA, MDS-UPDRS, PAS, MCST, BLOT, TMT, Digit span	Clinician, Patient	Original		0	0		0		0		0					0				0
44	Wu, Mu, et al.	2016	China		UKBBC	301	0.548	ns	58.4 (10.9)	ePD (all)	PD Phenotype	3.3 (1.2)	1.9 (03.5)	22.3 (1.3)	0.631	219 (167)	Tier 2	NMSQuest, HADS, HARS, ACE-R, MMSE, PDQ-39, MDS-UPDRS	Clinician, Patient	Sichuan University		4	0		0		0		1			24.9		0				0
45	Tosin, et al.	2022	USA	Secondary	ns	331	0.72	ns	62.4 (9)	ePD (baseline cohort)	later PD	0.8 (0.7)	2 [0-3]	25.4 (10.4)	0	N/A	Tier 2	MDS-UPDRS	Clinician, Patient	STEADY-PD		6	0		0		0		0					2	29.6			1									3.6
46	Paracha, et al.	2022	Multinational	Secondary	Fox Insight	9814	0.53	0.92	64.9 (9.7)	ePD (Fox Insight cohort)	HC; PPMI	1.4 (1.1)	N/A	ns	ns	ns	Tier 2	Open response	Patient	Fox Insight		1	0		0		0		0					0				0
47	Malek, et al.	2017	UK	Prospective	UKBBC	855	0.651		66.1 (9.2)	ePD - H&Y stage 1	later PD	1.2 (0.9)	1	16.8 (8.8)	0.903	264 (208)	Tier 2	ESS, LADS, MoCA, PDQ-39, NMSS, UPSIT, SCOPA-AUT, MDS-UPDRS	Clinician, Patient	Tracking PD Study		0	0		0		0		0					0				0
	CHINESE PSG SAMPLE	.	.	.	.	.	.	.	.	.	.	.	.	.	.	.	Tier 2	WEIGHTED ROW		Chinese PSG		2	0		0		0		0					1			18	0
48	Song, et al.	2014	China	Obs		428	0.602	ns	59.6 (10.4)	de novo PD (all)	M/F	1.8(1.8)	1.6 (1.2)	16.8 (9.6)	0	-		ADAS-Cog, CES-D, MMSE, PSQI, UPDRS	Clinician, Patient	Chinese PSG																	17.8
48	Song, et al.	2014	China	Obs		258	1		59.4 (10.6)	de novo PD - male cohort	M/F	1.75 (1.3)	1.6 (1.5)	16.8 (9.5)	0			ADAS-Cog, CES-D, MMSE, PSQI, UPDRS	Clinician, Patient	Chinese PSG																	19
48	Song, et al.	2014	China	Obs		170	0		59.8 (10.2)	de novo PD - female cohort	M/F	2.16 (2.4)	1.6 (0.6)	16.7 (9.7)	0			ADAS-Cog, CES-D, MMSE, PSQI, UPDRS	Clinician, Patient	Chinese PSG																	15.9
49	Zhang, et al.	2014	China	Obs		428	0.623		60.6 (10.7)	ePD (untreated cohort)	Rx group	1.9 (1.8)	1.6 (0.6)	16.8 (9.6)	0			CES-D, PSQI, ADAS-Cog, UPDRS	Clinician, Patient	Chinese PSG
	ICICLE-PD SAMPLE	.	.	.	.	.	.	.	.	.	.	.	.	.	.	.	Tier 2	WEIGHTED ROW		ICICLE-PD		3	0		0		0		0					0				0
50	Durcan, et al.	2019	UK	Secondary	UKBBC	154	0.649	ns	66.4 (10.4)	ePD (all)	Gender	0.5 (0.3-0.7)	2 (0.7)	26.9 (12.1)		203 (138)		GDS, MDS-UPDRS, MMSE, MoCA, NMSQuest	Clinician, Patient	ICICLE-PD
51	Dlay, et al.	2020	UK	Prospective	UKBBC	162	0.642	ns	66.2 (10.1)	ePD (baseline cohort)	HC, later PD	0.5 (0.4)	1.9 (0.7)	190.4 (159.9)	ns	190 (160)		PDQ-39, MDS-UPDRS, NPI, NPI-D, GDS, MoCA	Clinician, Patient	ICICLE-PD
52	Naisby, et al.	2021	UK	Prospective	UKBBC	154	0.643	ns	67 (10.4)	de novo PD (baseline cohort)	HC, later PD	0	20%>2	27 (12.1)	ns	178 (148)		GDS, MDS-UPDRS, MMSE, MoCA, NMSQuest	Patient	ICICLE-PD
	NORWEGIAN PARKWEST SAMPLE		.	.	.	.	.	.	.	.	.	.	.	.	.	.	Tier 2	WEIGHTED ROW		Norwegian ParkWest		0	0		0		0		0					0				0
53	Tholfsen, et al.	2017	Norway	Longitudinal	UKBBC	182	0.478	1	67.5 (9.2 )	de novo PD (baseline cohort)	HC, later PD	0	ns	26.1 (13.1)	0	N/A		ESS, MADRS, MMSE, PDSS, PIGD, UPDRS	Clinician, Patient	Norwegian ParkWest
54	Ongre, et al.	2017	Norway	Prospective	UKBBC	181	0.608	1	67.3 (9.3)	de novo PD (all)	HC, later PD	0	1.9 (0.62)	22.8 (10.8)	0	N/A		FSS, ESS, PDSS, MMSE, UPDRS, SAS	Clinician, Patient	Norwegian ParkWest
55	Muller, Assmus, Herlofson et al.	2013	Norway	Obs	UKBBC	171	0.55	1	72.5	ePD (all)	Rx group	2.4 (1.5)	2 (0.6)	23.1 (11.1)	0.81	-		UPDRS III, MDS-UPDRS	Clinician, Patient	Norwegian ParkWest
55	Muller, et al.	2013	Norway	Obs	UKBBC	140	0.545	1	72.5	ePD cohort taking DA	Rx group	2.4 (1.5)	2 (0.6)	24.1 (10.5)	1			UPDRS III, MDS-UPDRS	Clinician, Patient	Norwegian ParkWest
55	Muller, et al.	2013	Norway	Obs	UKBBC	31	0.545	1	72.5	ePD cohort prior to DA	Rx group	2.1 (1.5)	1.9 (0.7)	19.8 (13.3)	0			UPDRS III, MDS-UPDRS	Clinician, Patient	Norwegian ParkWest
	OPDC SAMPLE	.	.	.	.	.	.	.	.	.	.	.	.	.	.	.	Tier 2	WEIGHTED ROW				11	1	92.3	0		0		1	78.5				3	64.4			1									17.4
56	Szewczyk-Krolikowski, et al.	2014	England	Obs	UKBBC	490	0.624	-	65.9 (9.5)	incident PD cohort - all	M/F	1.7 (1.8)	92.5%<3	27 (11.2)	0.88	-		Purdue Pegboard, UPDRS I-IV, Flamingo Test, CGIC, TUG	Clinician, Patient	OPDC				92.3						78.5					64.4												17.4
56	Szewczyk-Krolikowski, et al.	2014	England	Obs	UKBBC	306	1	-	66.1 (9.2)	incident PD - male cohort	M/F	1.7 (1.6)	95%<3	27.7 (11.2)	0.882			Purdue Pegboard, UPDRS I-IV, Flamingo Test, CGIC, TUG	Clinician, Patient	OPDC				89.9						76.5					63.8												16.7
56	Szewczyk-Krolikowski, et al.	2014	England	Obs	UKBBC	184	0	-	65.7 (9.9)	incident PD - female cohort	M/F	1.8 (2.2)	88%<3	25.9 (11)	0.891			Purdue Pegboard, UPDRS I-IV, Flamingo Test, CGIC, TUG	Clinician, Patient	OPDC				95.6						81					65.4												18.1
57	Baig, et al.	2015	England	Obs	UKBBC	769	0.661		67.7 (9.5)	ePD (all)	HC	1.3 (1)	92.5%<3	26.4 (11)	0.874			BDI, LADS, HAAS CQ, RBDSQ, NINDS PD tool, MDS-UPDRS, Flamingo Test, SE, EQ-5D	Clinician, Patient	OPDC
58	Baig, et al.	2019	UK	Prospective	UKBBC	921	0.651	0.978	67 (9.2)	ePD (all)	ICB	1 [0.4-2.4]	92%≤2	26.4 (10.7)	0.88	321 (193)		MDS-UPDRS, QUIP, RBDSQ, PICS	Clinician, Patient	OPDC
	PD-DISCOVERY SAMPLE	.	.	.	.	.	.	.	.	.	.	.	.	.	.	.	Tier 2	WEIGHTED ROW					0		0		0		0					2	64.7			1									16.6
59	Rolinski, et al.	2014	England	Obs	-	475	0.597	ns	67.7 (9.4)	ePD (all)	RBD/non-RBD	1.5 (1)	1.9 (.05)	26.8 (10.9)	0.929	-		BDI, CGIC, MMSE, MoCA, Flamingo Test, Purdue Pegboard, QUIP, RBD, TUG, UPDRS, ESS	Clinician, Patient	PD-Discovery															64.7												16.6
59	Rolinski, et al.	2014	England	Obs	-	224	0.661		67.5 (9.4)	ePD + RBD cohort	RBD/non-RBD	1.6 (1)	1.9 (.05)	26.8 (10.6)	0.938			BDI, CGIC, MMSE, MoCA, Flamingo Test, Purdue Pegboard, QUIP, RBD, TUG, UPDRS, ESS	Clinician, Patient	PD-Discovery															69.5												23.5
59	Rolinski, et al.	2014	England	Obs	-	251	0.574		67.9 (9.5)	ePD non RBD cohort	RBD/non-RBD	1.4 (1)	1.9 (.05)	26.9(11.2)	0.9			BDI, CGIC, MMSE, MoCA, Flamingo Test, Purdue Pegboard, QUIP, RBD, TUG, UPDRS, ESS	Clinician, Patient	PD-Discovery															59.6												10.4
	PPMI SAMPLE	.	.	.	.	.	.	.	.	.	.	.	.	.	.	.	Tier 2	WEIGHTED ROW				3	0		0		0		1				34	0				0
60	Simuni, et al.	2018	Multinational	Secondary	PPMI	423	0.65	0.924	61.7 (9.7)	de novo PD (all)	HC, later PD	.5 (.5)	1.6 (0.5)	20.4 (9)	0	N/A		SCOPA-AUT, MoCA, STAI, ESS, RBDSQ, QUIP, UPSIT, MDS-UPDRS, GDS	Clinician, Patient	PPMI
61	Martinez-Ramirez, et al.	2020	Multinational	Secondary	PPMI	414	0.662	0.925	61.6 (9.7)	ePD (all)	SCOPA>10	0.6 (0.6)	1.6 (0.5)	20.9 (8.9)	0	N/A		ESS, GDS, MDS-UPDRS, MoCA, QUIP, RBDSQ, UPSIT, SCOPA-AUT	Clinician, Patient	PPMI													34
46	Paracha, et al.	2022	Multinational	Secondary	PPMI	416	0.65	0.93	61.6 (9.7)	ePD (PPMI cohort)	HC; Fox Insight	0.5 (0.5)	ns	ns	ns	ns		SCOPA-AUT, UPSIT, MDS-UPDRS, RBDSQ	Patient, Clinician	PPMI
	Author	Year	Country	Design	PD DX criteria	Early PD (N)	Sex (M)	White	Age (SD) [Range]	Cohort	Comparison Group	PD Dx Years (SD) [Range]	H&Y (SD)	UPDRS III (SD)	PD Rx (%)	LEDD	Tier	Instruments	Perspective	Source
Ref#	TIER 3: Predominantly Clinician or Observer Reported Outcomes															N=	39
62	Roggendorf, et al.	2012	Germany	Obs	UKBBC	21	0.57		65 (5.0)	ePD - H&Y1	HC; later PD	1.5 (1.2)	1	10 (5)	-	-	Tier 3	Actigraphy, UPDRS III	DHT	Original		2	0		0		0		0					2				1	+
63	Diederich, et al.	2013	Germany	Obs	ns	33	0.57		65.5 (11.6)	ePD (all)	HC	1.9 (0.3)	2 (.5)	-	-	-	Tier 3	Polysomnography	DHT	Original		0	0		0		0		0					0				0
64	Lee, Kim et al.	2014	Korea	Obs		56	0.429		67.7 (8.96)	ePD (all)	atypiclal PD	1.5 (1.3)	2.21 (0.48)	25.8 (10.4)	ns	-	Tier 3	Video observation	Clinician Observer	Original		12	0		0		0		0					10			10.62	7		39.29		57.14	23.21	21.43		10.7		42.86	3.57
65	Oh, et al.	2014	Korea	Obs		225	0.418		68 (10.9)	ePD (all)	RLS/no-RLS	1.8 (0.8)	1.7 (0.8)	25.2 (18.5)	0	-	Tier 3	IRLSSG, UPDRS	Clinician Observer	Original		2	0		0		0		0					0				0
66	Pellicano, et al.	2014	Italy	Prospective	ns	84	0.62		63 (9.4)	ePD (all)	HC	1(.9)	1.6(0.5)	15.1 (8.6)	0	-	Tier 3	ARS, BDI, HADRS, HARS, UPDRS, VF, WCST-SF, SCWT, Rey's Recall	Clinician	Original		0	0		0		0		0					0				0
66	Pellicano, et al.	2014	Italy	Prospective	ns	42	0.619		63.6 (8)	ePD (R sided PD cohort)	HC	0.9 (0.9)	1.6 (0.5)	15.1 (8.9)	0	-		ARS, BDI, HADRS, HARS, UPDRS, VF, WCST-SF, SCWT, Rey's Recall	Clinician	Original
66	Pellicano, et al.	2014	Italy	Prospective	ns	42	0.619		63 (10.7)	ePD (L sided PD cohort)	HC	1.1 (0.8)	1.5 (0.5)	15.1 (8.3)	0	-		ARS, BDI, HADRS, HARS, UPDRS, VF, WCST-SF, SCWT, Rey's Recall	Clinician	Original
67	Bega, Luo et al.	2015	US/Canada	Prospective	ns	1741	0.669	0.912	61.8 (9.6)	ePD (baseline cohort)	later PD	1.5 (1.1)	-	17.8 (8.4)	1	368 (229)	Tier 3	PDQ-39, SCOPA, EQ-5D, UPDRS, SDMT	Clinician	NET-PD LS1		0	0		0		0		0					0				0
68	Santangelo, et al.	2015	Italy	Prospective	UKBBC	75	0.6		61.6 (8.6)	de novo PD (all)	none	<2	1.8 (0.5)	13.8 (6.9)	0	-	Tier 3	BLOT, CAT, UPDRS, TMT, AES	Clinician	Original		0	0		0		0		0					0				0
69	Zucco, et al.	2015	Italy	Prospective	ns	12	0.5		65.3 (4.8)	ePD (all)	HC	2.25 (ns)	1-1.5	ns	1	-	Tier 3	None	Observer	Original		0	0		0		0		0					0				0
70	Adwani, et al.	2016	India	Prospective	UKBBC	50	0.74		52.2 (8)	ePD (all)	laterality; HC	2.3 (1.3)	ns	15.1 (7.1)	1	-	Tier 3	NIMHANS, MMSE, UPDRS III	Clinician	Original		0	0		0		0		0					0				0
71	Isais-Millan, et al.	2016	Mexico	Cross sectional	UKBBC	63	0.619		57.8 (10)	ePD (all)	none	1.8 (1.3)	2.4 (0.8)	27 (12.9)	0	-	Tier 3	LARS, MDS-UPDRS, MoCA, DEX-Sp, HADS, QUIP, BPRS	Clinician	Original		0	0		0		0		0					0				0
72	Moreau, et al.	2016	France	Prospective	UKBBC	66	0.636		62.5 (7.9)	ePD (all)	HC	1.3 (1.0)	ns	19.4 (8.1)	0.59	371 (132)	Tier 3	BECD, HARS, MADRS, MDS-UPDRS, MMSE, MoCA	Clinician	Original		0	0		0		0		0					0				0
73	Podgorny, et al.	2016	Canada	Prospective	UKBBC	26	0.58	ns	63 [42-78]	ePD (all)	HC	.9 [0-4]	ns	ns	0.04	ns	Tier 3	UENS	Clinician	Original		0	0		0		0		0					0				0
74	Schindlbeck, et al.	2016	Germany	Prospective	UKBBC	44	0.461	ns	66.4 (12.3)	ePD (all)	HC	1.8 (0.9)	2.1 (0.6)	27.4 (9.8)	ns	ns	Tier 3	UPDRS, NMSQuest, MMSE, BDI, SF-36, mTCNS	Clinician	Original		0	0		0		0		0					0				0
75	Stankovic, et al.	2016	Serbia	Prospective	UKBBC	111	0.541		61.4 (9.6)	de novo PD (all)	HC	<2	1	16 (4.7)	0.64	ns	Tier 3	ACE-R, HARS, HADRS, MDS-UPDRS, NPI, SCOPA-PC	Clinician	Original		1	0		0		0		0					0				0
76	Zhang, et al.	2016	China	Prospective	UKBBC	248	0.452		65.9	ePD (all)	later PD	1 (0.16)	≤2	19.2 (2.6)	>50	ns	Tier 3	HARS, HADS, UPDRS III, NMSS	Clinician	Original		2	0		0		0		0					1				1									16*
77	Baig, et al.	2017	England	Prospective	UKBBC	941	0.648		67.2 (9.6)	ePD (all)	HC, RBD group	1.3 [0.1 -3.5]	93%≤2	26.4 (10.8)	0.872	ns	Tier 3	Big 5, MoCA, BDI, LADS, RBDSQ, ESS, MDS-UPDRS, QUIP	Clinician	OPDC		0	0		0		0		0					0				0
78	Mollenhauer, et al.	2019	Germany	Prospective	UKBBC	135	0.65	ns	64.5 (9.8)	de novo PD (baseline cohort)	later PD	<.5	ns	22.8 (12)	ns	ns	Tier 3	MDS-UPDRS, GDS, NMSQuest, MMSE, PDQ-39	Clinician	Original		0	0		0		0		0					0				0
79	Yoo, et al.	2019	Korea	Prospective	UKBBC	124	0.532	ns	70.1 (8.9)	de novo PD (all)	MCI groups	1 (1.5)	1.5 (1)	16.2 (9.3)	0	N/A	Tier 3	UPDRS, MADRS, PDQ-39, NMSS	Clinician	Original		0	0		0		0		0					0				0
80	Diederich, et al.	2020	Luxembourg	Prospective	UKBBC	64	0.58	ns	64.2 (11.6)	ePD (all)	HC	<3	ns	9.2 (5.2)	ns	177 (276)	Tier 3	FAB, BDI, SCOPA-AUT, MMSE, UPDRS, UPSIT, BADS, VOSP, NMSQuest, TMT, PDSS	Clinician	Original		0	0		0		0		0					0				0
81	Fagerberg, et al.	2020	Germany	Prospective	ns	20	0.65	ns	60.8 (8.3)	ePD (all)	HC, later PD	3.1 (1.8)	2 (0.2)	ns		527 (253)	Tier 3	None, Observation	Clinician	Original		0	0		0		0		0					0				0
82	Kwon, et al.	2020	Korea	Prospective	UKBBC	80	0.324	ns	72.3 (9.5)	ePD (all)	dizziness	2.2 (1.4)	2.1 (0.4)	26.3 (8)		178 (262)	Tier 3	MoCA, BDI, PFS, BAI, UPDRS	Clinician	Original		0	0		0		0		0					0				0
83	Moguel-Cobos, et al.	2020	USA	Secondary	ns	41	0.439	ns	67.2 (9.2)	ePD (all)	none	<5	ns	ns	0.8	ns	Tier 3	LSAS, UPDRS	Clinician	Original		0	0		0		0		0					0				0
84	Baschieri, Sambati et al.	2021	Italy	Longitudinal	(+)DaTScan	105	0.638	ns	61 (9)	ePD (baseline cohort)	later PD	1.6 (.8)	1.4 (0.5)	15 (7)	0.209	205 [36-640]	Tier 3	SCOPA-AUT, CRT, UPDRS III	Clinician	Original		0	0		0		0		0					0				0
85	Kim, et al.	2021	Korea	Prospective	MDS	14	0.642	ns	64.1 (9.3)	ePD (all)	HC	2 (2)	1.9 (0.6)	11.6 (8.5)	0	N/A	Tier 3	BDI, BAI, RBDSQ, PDSS, MMSE, SCOPA-AUT, NPI, NMSS	Clinician	Original		0	0		0		0		0					0				0
86	Pan, et al.	2021	China	Prospective	UKBBC	99	0.367	Chinese	60.9 (6.5)	de novo PD (all)	none	1.3 (1)	1.7 (0.5)	22.9 (10.7)	0	N/A	Tier 3	CDT, VFT, AVLT, LMT, HVOT, CCI, MMSE, MoCA, HADS, HARS, NMSQuest, UPDRS	Clinician	Nanjing Medical University		0	0		0		0		0					0				0
87	Picillo, et al.	2021	Italy	Secondary	ns	385	0.641	ns	ns	ePD (all)	M/F, Age	ns	≤ 2	ns	ns	ns	Tier 3	UPDRS, MMSE, PDQ-39, EQ-VAS, HADS, HARS	Clinician	PRIAMO		0	0		0		0		0					0				0
88	Eriksson, et al.	2022	Sweden	Prospective	UKBBC	33	0.545	ns	63.5 (9.5)	ePD (all)	HC	ns	1.6 (0.8)	17.3 (10.5)	1	545 (307)	Tier 3	Emotion Survey, BDI, FAB, MoCA, MDS-UPDRS III	Clinician	Original		0	0		0		0		0					0				0
89	Marković, et al.	2022	Serbia	Longitudinal	UKBBC	42	0.619	ns	59 (9.8)	ePD (all)	later PD	1.5 (1.1)	1	15.2 (4.3)	ns	131 (190)	Tier 3	UPDRS, DHT, HARS, HADS, STROOP, AES, ACE-R, MMSE, TMT, BNT, RAVLT, Digit span, Hooper	Clinician	Original		2	0		0		0		0					3				3				-			+			-
90	Meira, et al.	2022	France	Prospective	ns	193	0.617	ns	58.8 (9.14)	de novo PD (all)	none	1.9 (1.8)	ns	24.9 (9.7)	ns	ns	Tier 3	BDI, AES, ASBPD, MATTIS, QUIP, PDQ-39, MDS-UPDRS	Clinician	Original		0	0		0		0		0					0				0
91	Skrabal, et al.	2022	Czech	Prospective	MDS	180	1	Czech	61.8 (11.6)	ePD (all)	RBD/non-RBD	1.1 (1.5)	ns	22.5 (11.8)	0	N/A	Tier 3	MDS-UPDRS, Audio recordings	Clinician	Original		0	0		0		0		0					0				0
92	Choi, et al.	2023	Korea	Prospective	UKBBC	324	0.414	ns	67.4 (9.5)	ePD (all)	none	1.5 (1.5)	1.8 (0.6)	21.1 (10)	ns	ns	Tier 3	BAI, BDI, AES, PDQ-39, NMSS, MMSE, UPDRS	Clinician	Original		0	0		0		0		0					0				0
93	Adams, et al.	2023	USA	Prospective	Study	82	0.56	0.95	63.3 (9.4)	ePD (all)	HC	0.8 (0.6)	≤2	24.1 (10.2)	0	N/A	Tier 3	DHT, DaTscan, MoCA, MMSE, MDS-UPDRS, ESS, GDS, RBDSQ, SCOPA-AUT, PDQ-39	Clinician Observer	WATCH-PD		2	1	+	1	+	0		0					0				0
94	Zhou, et al.	2022	China	Cross sectional	MDS	75	0.533	ns	64.5 (8.1)	de novo PD (baseline cohort)	HC	1 [0.5-2]	50%≤2	19 (13-29)	0	N/A	Tier 3	Video observation, SS, MoCA, MDS-UPDRS, HADS, MMSE, TETRAS, RBDSQ, NMSQuest	Clinician Observer	Shanghai University		1	0		0		0		1				+	0				0
	NORWEGIAN PARKWEST SAMPLE		.	.	.	.	.	.	.	.	.	.	.	.	.	.	Tier 3	WEIGHTED ROW				5	1	+	0		0		1	+				2			+	1	+
95	Tveiten, et al.	2013	Norway	Prospective	UKBBC	183	-		67.9 (9.1)	ePD baseline cohort	later PD; Rx group	2.3 (1.9)	1.9 (0.6)	22.4 (10.8)	0			SE, UPDRS III, PIGD	?	Norwegian ParkWest				+						+							+
96	Tholfsen, et al.	2015	Norway	Prospective	UKBBC	153	0.607		66.5 (8.9)	incident PD - baseline cohort	later PD	incident	ns	21.4 (9.4)				ESS, MMSE, MADRS, UPDRS	Clinician	Norwegian ParkWest
97	Larsen, et al.	2017	Norway	Prospective	UKBBC	187	0.6		67.8 (9.3)	de novo PD (all)	HC, later PD	0	ns	23.3 (11.3)	0.02	0		MADRS, UPDRS, MMSE, SE, CCI	Clinician	Norwegian ParkWest
98	Muller, Assmus, Larsen et al.	2013	Norway	Prospective	UKBBC	166	-		67.7 (9.3)	ePD baseline cohort	later PD	-	1.9 (0.6)	23.2 (11.1)	0			ESS, FSS, MADRS, MMSE, SAS, SF-36, UPDRS I-IV	Clinician	Norwegian ParkWest				-						+							+		+
	ICEBERG SAMPLE	.	.	.	.	.	.	.	.	.	.	.	.	.	.	.	Tier 3	WEIGHTED ROW				0	0		0		0		0					0				0
99	Jeancolas, et al.	2022	France	Longitudinal	UKBBC	120	0.625	ns	63.8 (9.3)	ePD (all)	HC, RBD group, M/F	2.6 (1.4)	2	32.4 (7.0)	1	389 (263)		Audio recordings	Clinician	ICEBERG
99	Jeancolas, et al.	2022	France	Longitudinal	UKBBC	75	1	ns	63.8 (9.3)	ePD - male cohort	HC, RBD group, M/F	2.5 (1.4)	2 (0.1)	34.2 (7.1)	1	412 (297)		Audio recordings	Clinician	ICEBERG
99	Jeancolas, et al.	2022	France	Longitudinal	UKBBC	42	0	ns	63.7 (9.3)	ePD - female cohort	HC, RBD group, M/F	2.7 (1.5)	2 (0)	29.5 (5.8)	1	351 (189)		Audio recordings	Clinician	ICEBERG
	ICICLE-PD SAMPLE	.	.	.	.	.	.	.	.	.	.	.	.	.	.	.	Tier 3	WEIGHTED ROW				2	0		0		0		0					1				1	+
100	Lord, et al.	2013	England	Obs	UKBBC	122	0.672		67 (10.5)	de novo PD (all)	HC	-	1.9 (0.63)	25.4 (11.1)	ns			GDS, MMSE, UPDRS III	Clinician	ICICLE-PD																			+
101	Morris, et al.	2017	England	Longitudinal	UKBBC	119	0.664		66.1 (9.9)	ePD (all)	HC, later PD	0.5 (0.4)	1.9 (0.64)	25 (10.4)	ns	172 (129)		NART, FOG, GDS, MMSE, MDS-UPDRS	Clinician	ICICLE-PD
	PALS SAMPLE	.	.	.	.	.	.	.	.	.	.	.	.	.	.	.	Tier 3	WEIGHTED ROW				0	0		0		0		0					0				0
102	Huang, et al.	2018	Singaporte	Prospective	NINDS	125	0.75	Chinese	64.5 (9)	ePD (all)	PD Phenotype	0.4 (0.3)	1.9 (0.3)	21.3 (10.1)		210.6 (152.3)		MDS-UPDRS, HADS, HARS, NMSS, PSQI, RBDSQ, FSS	Clinician	PALS
103	Chua, et al.	2021	Singapore	Prospective	NINDS	121	0.643	ns	66.7 [60-72]	ePD (all)	none	1 [0.8-1.5]	ns	18 [14-25]	ns	[50-375]		AES, ADAS-Cog, FFT, BNT, WAIS, WMS, RBANS, ROCF, MoCA, MMSE, MDS-UPDRS, BLOT, HADS, GDS	Clinician	PALS
104	Koh, et al.	2022	Singapore	Longitudinal	NINDS	109	0.625	ns	66 (9.1)	ePD (all)	none	0.5 (0.4)	1.9 (0.4)	20.3 (9.7)	ns	227 (179)		AES, ADAS-Cog, FFT, BNT, WAIS, WMS, RBANS, ROCF, MoCA, MMSE, MDS-UPDRS, BLOT, HADS, GDS	Clinician	PALS
	PPMI SAMPLE		.	.	.	.	.	.	.	.	.	.	.	.	.	.	Tier 3	WEIGHTED ROW				8	1	83	0		0		1	76				1			7	0
105	Liu, et al.	2015	USA	Secondary	PPMI	414	0.65	0.92	61.7 (9.7)	ePD (all)	HC	0.6 (0.6)	≤2	20.9 (8.9)	0	N/A		ESS, MoCA, QUIP, RBDSQ, GDS, SCOPA, DaTscan, UPDRS	Clinician	PPMI				82.9						76.1
105	Liu, et al.	2015	USA	Secondary	PPMI	269	1		62.1 (9.8)	ePD - male cohort	HC	0.5 (0.5)	2	21 (9)	0			ESS, MoCA, QUIP, RBDSQ, GDS, SCOPA, DaTscan, UPDRS	Clinician	PPMI				84						80.2							7
105	Liu, et al.	2015	USA	Secondary	PPMI	145	0		60.6 (9.6)	ePD - female cohort	HC	0.6 (0.6)	2	20.3 (8.4)	0			ESS, MoCA, QUIP, RBDSQ, GDS, SCOPA, DaTscan, UPDRS	Clinician	PPMI				81.3						69.4							7
106	Simuni, et al.	2015	USA	Secondary	PPMI	423	0.65	0.92	61.7 (9.7)	de novo PD (baseline cohort)	HC, later PD	0.6 (0.6)	≤2	20.9 (8.9)	0	N/A		ESS, MDS-UPDRS, SE, MoCA, GDS, STAI, QUIP, RBDSQ, DaTscan	Clinician	PPMI
107	Amara, et al.	2017	USA	Secondary	PPMI	423	0.65	0.924	61.7 (9.7)	ePD (baseline cohort)	HC, later PD	0.6 (0.6)	≤2	20.9 (8.9)	0	N/A		ESS, MDS-UPDRS, SE, MoCA, GDS, STAI, QUIP, RBDSQ, DaTscan, SCOPA	Clinician	PPMI
108	Labelle, et al.	2017	USA	Secondary	PPMI	424	0.66	0.924	61.7 (9.7)	de novo PD (all)	Latent class	.5 (.5)	1.6 (0.5)	20.4 (9)	0	N/A		HVLT, BLOT, SDMT, MDS-UPDRS, CSF biomarkers, ESS, GDS, SCOPA, UPSIT	Clinician	PPMI				82.9						76.7							6.9
109	Serra, et al.	2018	Multinational	Secondary	PPMI	423	0.65	0.924	61.7 (9.7)	de novo PD (all)	HC	.5 (.5)	1.6 (0.5)	20.4 (9)	0	N/A		SCOPA-AUT, MoCA, DaTscan	Clinician	PPMI
110	Amara, et al.	2019	Multinational	Secondary	PPMI	380	0.655	ns	63.6 (9.8)	ePD (Y2 cohort)	HC	2.6 (0.6)	ns	ns	ns	n		PASE, MDS-UPDRS	Clinician	PPMI
111	Dijkstra, et al.	2022	Multinational	Secondary	PPMI	421	0.65	0.924	61.7 (9.7)	de novo PD (all)	Prodromal PD	0.6 (0.6)	≤2	20.9 (8.9)	0	N/A		ESS, GDS, MDS-UPDRS, MoCA, QUIP, RBDSQ, UPSIT, SCOPA-AUT, STAI	Clinician	PPMI
112	Hemphill, et al.	2023	Multinational	Secondary	PPMI	487	0.651	0.928	61 (9.7)	ePD (all)	later PD	ns	ns	20 (9.2)	ns	ns		LNS, BLOT, SDMT, HVLT, MoCA, MDS-UPDRS III, GDS	Clinician	PPMI
	SICHUAN UNIVERSITY SAMPLE	.	.	.	.	.	.	.	.	.	.	.	.	.	.	.	Tier 3	WEIGHTED ROW				0	0		0		0		0					0				0
113	Ou, Hou, Liu et al.	2021	China	Prospective	UKBBC	174	0.511	Chinese	57.7 (10.8)	ePD (all)	later PD	1.5 (1.3)	2 (0)	22 (14)	0.477	144 (185)		MoCA, FAB, HADS, HARS, FSS, UPDRS	Clinician	Sichuan University
114	Ou, Lin et al.	2021	China	Prospective	UKBBC	188	0.505	Chinese	58.1 (10.7)	ePD (all)	later PD	1.5 (0.8)	1.9 (0.4)	23.3 (10.6)	0.479	152 (188)		MoCA, FAB, HADS, HARS, FSS, UPDRS, LARS	Clinician	Sichuan University
	EXCLUDED															N=	63
124	Erro, Vitale et al.	2013	Italy	Obs		100						1 (0.5)	-	15.3 (7.4)	0		X	FAB, HADS, MMSE, NMSQuest, UPDRS III		Original
125	Khoo, et al.	2013	England	Obs		159	0.66		66.6 (10.3)			4.4	2 (0.67)	27.3 (12.1)	-		X	GDS, MMSE, MoCA, UPDRS I-IV	Clinician, Pt?	ICICLE-PD
126	Picillo, et al.	2013	Italy			44						-	1.8 (0.4)	16.7 (8.4)	+		X	SE, UPDRS III, PIGD		Original
127	de La Riva, et al.	2014	Multinational	Obs	PPMI	423	0.655		62.4 (9.7)			6.5 (6.5)	1 [1-2]	20.9 (8.9)	+		X	ESS, GDS, MDS-UPDRS, MoCA, PIGD, QUIP, RBD, STAI, UPSIT		PPMI
128	Duncan, et al.	2014	England	Obs		158	0.658		66.5 (10.3)			-	2 (0.64)	27.1 (12)	-		X	ESS, GDS, MMSE, MoCA, NMSQuest, PDQ-39, PIGD, PSQI, MDS-UPDRS		ICICLE-PD
129	Frandsen, et al.	2014	Turkey	Obs											.		X			Original
130	Hanoglu, et al.	2014	Turkey	Obs		10	0.9		59.6 (7.0)				1		.		X	AVLT, BFR, BLOT, MMSE, SCWT, UPDRS		Original
131	Lawson, et al.	2014	England			219						>5.3		-	-		X	CANTAB, CDR, MMSE, MoCA, PDQ-39, MDS-UPDRS III, GDS, NART, NPI-D	Pt
132	Lee, Chang et al.	2014	Taiwan												.		X
133	Mahajan, et al.	2014	USA			418	0.651		62.9 (9.74)						.		X			PPMI
134	Bega, Kim, et al.	2015	US/Canada	Prospective	ns	1741	0.669	0.912	61.8 (9.6)		later PD	1.7 (1.1)	-	17.8 (8.4)	1	368 (229)	X			NET-PD LS1
135	Hong, et al.	2015										>3 (3)					X
136	Lieberman, et al.	2015										>4.2 (0.7)					X
137	Louter, et al.	2015										>4					X		Clinician
138	Zis, et al.	2015										3.7 (1.1)					X
139	Bjornestad, et al.	2016		Prospective								0.13 (0.13)					X
140	Defazio, et al.	2016								ePD (all)	HC	6 (4)					X
141	Fullard, et al.	2016				423	0.65					0.6 (0.6)					X
142	Lamont, et al.	2016										5.0 (8.3)					X
143	Olszewska, et al.	2016										>5					X		Clinician
144	Tieve, et al.	2016
145	Eisinger, et al.	2017	USA	Retro	PPMI	423							1,2				X		Clinician	PPMI
146	Fereshtehnejad, et al.	2017	Canada	Retro	PPMI	421											X		Clinician	PPMI
147	Hindle, et al.	2017	UK	Prospective	UKBBC	69					none	ns	1.4 [94%≤2]	21.5 (10.39)		487 (382)	X		Clinician	Original
148	Kluger, et al.	2017	Norway	Prospective	UKBBC	192			67.9 (9.3)				1.9 (0.6)				X		Clinician	Norwegian ParkWest
149	Picillo, et al.	2017		Longitudinal		585				ePD (baseline cohort)	PD-US/PD-NUS; later PD	>4.5 (0.2)		18.7 (0.5)			X			PRIAMO
150	Toomsoo, et al.	2017	Estonia	Prospective								6.1 (5.2)					X
151	Barrett, et al.	2018	Multinational	Longitudinal	PPMI	423											X		Clinician
152	Guan, et al.	2018										4.4 (4.3)					X
153	Hughes, et al.	2018	USA	Secondary	Study	ns						ns	ns	ns			X			HPFS
154	Kandaswamy, et al.	2018	India	Prospective	Clinical	25	1	ns	51.8 ( 8.4)	ePD (all)	HC	2.0 (0.7)			1		X		Clinician
155	Park, et al.	2018	Korea	Prospective		132				Middle onset PD	Late onset PD	1.2 (.9)					X		Clinician
156	Wu, et al.	2018										8.8 (5.1)					X
157	Chahine, et al.	2019	Multinational	Secondary	PPMI	413											X			PPMI
158	Huang, et al.	2019	Singapore	Prospective	NINDS	132	0.583	ns	63.6 (8.7)	ePD (baseline cohort)	PD Phenotype	0.7 ((0.3)	1.8 (0.5)	31.1 (10.2)			X			PALS
159	Kim, et al.	2019	Korea	Secondary	PPMI	423	0.65								0		X			PPMI
160	Li, et al.	2019	China			52						3.7 (2.6)	<3				X
161	Ma, et al.	2019	China									1.9 (1.8)	2 (0.6)	12.1 (4.6)			X
162	Picillo, et al.	2019	Italy	Longitudinal	Gelb	355		ns				>5					X	Interview
163	Romosan, et al.	2019										>5	H&Y 1-3				X
164	Ryu, et al.	2019	Korea		UKBBC	203	0.478	ns	69.3 (0.7)	de novo PD (all)	Impulsivity	0.9 (1.5)		17.5 (10.6)			X
165	Stuart, et al.	2019							67.9 (8.2)			0.5 (0.5)	2 (0.7)	26.9 (12.1)		178 (148)	X
166	Mills, et al.	2020	USA	Secondary		336	0.69	?	61.8 (9.1)	ePD (baseline cohort)			1.7 (0.5)	17.2 (6.8)			X			STEADY-PD III
167	Park, et al.	2020	Multinational	Secondary	PPMI	263	0.622	0.97	58.2 (10.5)	de novo PD (all)							X
168	Baraldi, Avazino et al.	2021	Italy									ns					X	BDI, Digit span, Corsi span, ToM-EAT, APACS, RMeT, PD-CRS, MoCA, UPDRS, STROOP
169	Chao, et al.	2021															X
170	Kwon, Lee et al.	2021	Korea						70.1 (9.2)			1.9 (1.3)					X
171	Kwon, Park et al.	2021	Korea														X
172	Liguori, et al.	2021		Prospective	UKBBC	26	0.693	ns	65.4 (8.7)			2.84 (1.25)	≤2	23.6 (8.4)	1	ns	X
173	Liu, et al.	2021										3.7 (2.6)					X
174	Ng, et al.	2021	Singapore	Prospective	NINDS	121	0.616	Chinese	64.5 (8.2)	de novo PD (baseline cohort)	later PD						X			PALS
175	Ou, Hou, Wei et al.	2021	China	Prospective	UKBBC	224	0.54	Chinese	57.6 (11.1)	ePD (all)	later PD	1.5 (0.9)			0.437	129 (175)	X			Sichuan University
176	Yoo, et al.	2021	Korea	Prospective	UKBBC	168					HC	1.5			0	N/A	X
177	Julio, et al.	2022					0.5					3 (3)	1.25 (1)	22.5 (13)			X
178	Kwon, et al.	2022			UKBBC	86	0.43	ns			none	1.9 (1.45)	2.2 (0.4)	23.3 (8.9)	0.372	139 (218)	X	DaTscan, MRI
179	Ma, et al.	2022	Multinational	Secondary	PPMI	423					HC, Prodromal PD						X			PPMI
180	Martinez-Nunez, et al.	2022	Multinational	Secondary	PPMI	486				de novo PD (baseline cohort)	later PD			21.3			X			PPMI
181	Picillo, et al.	2022	Multinational	Secondary	PPMI	423	0.65				later PD, M/F						X
182	Skjaerbaek, et al.	2022				30						9 (4)					X	MDS-UPDRS, MoCA, SS, ROME III, MDT-PD, RBDSQ	Clinician	Original
183	Szymkowicz, et al.	2022	Multinational	Secondary	PPMI	487	0.65	0.95									X			PPMI
184	Zolfaghari, et al.	2022	Multinational	Secondary	PPMI	420											X		Clinician, Patient	PPMI
185	Meng, et al.	2023				423											X
186	Morel, et al.	2023				60						4.9 (3.7)					X	Interview
187	Turner, et al.	2023	Multinational	Secondary	PPMI						HC, MCI group						X
	FOOTNOTES
	CONFIDENTIAL Note: Cells with no values or errors resulting from division by "0" are colored with solid grey. To view error - turn off conditional formatting rule for cells with errors. Organization follows the Consensus Conceptual Model of Early PD, with Domains show in dark blue, Categories within each Domain shown in yellow, Concepts within each Category show in light blue, and other items in …	This XL file shows coding presence for all symptoms and impacts in all studies reporting symptoms or impacts of "early PD" for the years 2013-2023. DEFINITION OF EARLY PD: Defined by the source. Generally less than 5-6 years. (Next tab shows <3 yrs only) CODING APPROACH: Where listed, frequencies within the study sample are reported. Where no frequencies were reported, concepts are indicated as h…
[truncated: 318 more columns]

## Sheet: Abbreviations & Instruments
ABBREVIATIONS/INSTRUMENT	FULL NAME OF INSTRUMENT USED		TIER	EXPLANATION		ABBREVIATIONS/SOURCE	STUDY SOURCE OR SAMPLE
ACE-R	Addenbrookeʼs Cognitive Examination–Revised		Tier 1	Qualitative or mixed methods focused on patient voice and without limitation on type of symptoms or impacts assessed		Chinese PSG	Chinese Parkinson Study Group
Actigraphy			Tier 2	Patient reported outcomes - generally quantitative and with restriction to type of information collected, reflecting the patient perspective		Fox Insight	Michael J Fox Foundation for Parkinson's Fox Insight Study
ADAS-Cog	Alzheimer’s Disease Assessment Scale-Cognitive		Tier 3	Clinician or observer reported outcomes - reflecting the observer perspective		HPFS	Health Professionals Follow-up Study
AE			X	Excluded studies		ICICLE-PD	Incidence of Cognitive Impairment in Cohorts with Longitudinal Evaluation in Parkinon's Disease Study
AES	Apathy Evaluation Scale					NET-PD LS1	NCT00449865
APACS	Assessment of Pragmatic Abilities and Cognitive Substrates					Norwegian ParkWest
ARS	Apathy Rating Scale					OPDC	Oxford Parkinson Disease Center Cohort
Audio recordings						Original	Original research not from larger study cohort
AVLT	Auditory Verbal Learning Test					PALS	Early Parkinson's Disease Longitudinal Singapore
AVLT	Auditory Verbal Learning Test (AVLT)					PD-Discovery
BADS	Behavioural Assessment of the Dysexec- utive Syndrome (BADS)					PPMI	Prodromal Parkinson's Markers Initiative
BAI	BecK Anxiety Inventory					PRIAMO	Parkinson Disease Non-motor Symptoms Study
BDI	Beck Depression Inventory					Tracking PD Study	Tracking Parkinson's Study
BECD	French battery of clinical evaluation of the dysarthria					STEADY-PD III	Parallel Group Study of Isradipine as a Disease Modifying Agent in Subjects With Early Parkinson Disease (STEADY-PD III)
BFR	Benton’s face recognition test					COPPADIS	COhort of Patients with PArkinson's DIsease in Spain
Big 5	Big Five Inventory					BoProPark	Bologna motor and non-motor prospective study on parkinsonism
BLOT	Benton Judgment Line Orientation Test					Sichuan University	Sichuan University 4 year prospective cohort study
BNT	Boston Naming Test					Nanjing Medical University
BPRS	Brief Psychiatric Rating Scale					ICEBERG	Cohort Study to Identify Predictor Factors of Onset and Progression of Parkinson's Disease
CANTAB	Cambridge Neuropsychological Test Automated Battery					STEADY-PD	Safety, Tolerability, and Efficacy Assessment of Isradipine for PD
CAT	Constructional Apraxia Test					Shanghai University
CCI	Charlson comorbidity index					WATCH-PD	Wearable Assessment in The Clinic and at Home in PD - NCT03681015
CCI	Cognitive Complaints Interview (CCI
CDR	Cognitive Drug Research battery
CDT	Clock drawing test
CES-D	Center for Epidemiological Studies Depression Scales
CGIC	Clinical Global Impression of Change (CGIC) Scale
Corsi span	Corsi Span
CRT	Cardiovascular reflex tests (CRTs)
CSF biomarkers	Cerebral spinal Fluid biomarkers
DaTscan
DEX-Sp	Dys-executive questionnaire
DHT	Digital health technology
Digit span	Digit Span Test
Emotion Survey	Emotion Survey (EU Emotion Stimulus Video Set)
EQ-5D	EuroQol-5 Dimension Questionnaire
EQ-VAS	EuroQol visual analogue scale
ESS	Epworth Sleepiness scale
EUROHIS-QOL8
FAB	Frontal Assessment Battery
FFT	Fruit Fluency tests
Flamingo Test
FOG	Freezing of Gait Questionnaire
FSS	Fatigue Severity Scale
GDS	Geriatric Depression Scale
HAAS CQ	Honolulu-Asia Ageing Study Constipation Questionnaire
HADRS	Hamilton Depression Rating Scale
HADS	Hosptial Anxiety Depression Scale
HARS	Hamilton Anxiety Rating Scale
Hooper	Hooper’s test of visual organization
HVLT	Hopkins Verbal Learning Test
HVOT	Hooper Visual Organization Test (HVOT)
Interview	Interview with Patient
IRLSSG	International Restless Legs Syndrome Study Group (IRLSSG) diagnostic criteria
LADS	Leed's Anxiety and Depression Scale
LARS	Lille Apathy Rating Scale
LMT	Logical Memory Test
LSAS	Liebowitz Social Anxiety Scale (LSAS)
MADRS	Montgomery and Assberg Depression Rating scale
MCST	Modified Card Sorting Test
MDS-UPDRS	Movement Disorder Society sponsored UPDRS
MDS-UPDRS I
MDS-UPDRS II
MDS-UPDRS III
MDS-UPDRS-IV
MINI	Mini International Neuropsychiatric Inventory
MMSE	Mini Mental State Examination
MoCA	Montreal Cognitive Assessment
MRI	brain magnetic resonance imagi
mRS	Modified Rankin Scale
mTCNS	Toronto Clinical Neuropathy Score
NART	National Adult Reading Test
NART	National Adult Reading Test
NIMHANS	National Institute of National Health and Neurosciences neuropsychological battery
NINDS PD tool	National Institute of Neurological Disorders and Stroke [NINDS] Parkinson’s tool
NMSQuest	Non Motor Symtpoms Questionnaire
NMSS	Non Motor Symtpoms Scale
None
NPI	Neuropsychiatric Inventory
NPI-D	Neuropsychiatric Inventory Caregiver Distress (NPI-D)
Observation	Observation
PAS	Parkinson Anxiety Scale
PASE	Physical Activity Scale of the Elderly
PD-CRS	Parkinson’s Disease Cognitive Rating Scale
PDQ-39	Parkinson's Disease Qualityof Life Questionnaire
PDSS	Parkinons' Disease Sleep scale
PFS	Parkinson’s disease fatigue scale
PICS	Parkinson’s Impulse- Control Scale
PIGD	Postural Instability and Gait Disturbance Phenotype
Polysomnography
PSQI	Pittsburgh Sleep Quality Index
Purdue Pegboard
QUIP	Questionnaire for Impulsive-Compulsive Disorders in Parkinson's
RAVLT	RAVLT Ray’s auditory verbal learning test
RBANS	Repeatable Battery for the Assessment of Neuropsychological Status (RBANS)
RBDSQ	REM Sleep Behavior Disorder questionnaire
Rey's Recall	Rey's 15 word test (immediate and delayed recall)
RMeT	Reading the Mind in the Eyes test
ROCF	Rey-Osterreith Complex Figure
SAS	Starkstein Apathy scale
SCOPA	Scales for Outcomes in Parkinson’s-Cognition
SCOPA-AUT	Scale for Outcomes in Parkinson’s disease for Autonomic Symptoms
SCOPA-PC	Scales for Outcomes in Parkinson’s Disease–Psychiatric Complications.
SCWT	Stroop Color Word Test
SDMT	Symbol Digit Modalities Test
SE	Schwab and England Activities of Daily Living scale
SF-36	Short-form Health Survey (HRQoL)
SS	Sniffin Stick
STAI	Stait-Trait Anxiety Assessment
STROOP
TFC	Total Function Capacity
TMT	Trail Making Test
ToM-EAT	Theory of Mind Emotion Attribution Test
TUG	Timed up and Go
UENS	Utah Early Neu- ropathy Scale
UPDRS
UPDRS I
UPDRS I-IV	Universal Parkinson's Disease Rating Scale (pre-MDS)
UPDRS II
UPDRS III
UPDRS IV
UPSIT	University of Pennsylvania Smell Identification Test
VAFS	Visual Analog Fatigue Scale
VAS-Pain	Visual Analog Scale-Pain
VF	Verbal fluency tests
VFT	Verbal Fluence Test (VFT)
Video observation
VOSP	Visual Object and Space Perception Battery (VOSP)
WAIS	Wechsler Adult Intelligence Scale 4th Edition (WAIS-IV)
WCST-SF	Wisconsin Card Sorting Test short form
WMS	Wechsler Memory Scale 4th Edition (WMS-IV)
Open response
ROME III	Functional Constipation Questionnaire
MDT-PD	Munich dysphagia test-Parkinson’s dis- ease
TETRAS	Tremor Research Group Essential Tremor Rating Scale (TETRAS)
LNS	Letter Number Sequencing
ASBPD	Ardouin Scale of Behavior in Parkinson’s Dis- ease
MATTIS	Demential rating scale

## Sheet: Key to interpret SOFT
Table 1. Key to interpreting Grade and Level of evidence
	% Studies	75-100%	50-74%	25-49%	1-24%	Missing
Tier 1	Grade	A	B	C	D	X
Tier 2 & 3	Level	1	2	3	4	x
Notes. Grade and level are based on the percent of studies in each tier that support a concept as being present in early stage PD (<3 years from diagnosis). It does not indicate the prevalence or relative bothersomeness. Concepts with low grade and and level may be understudied important concepts, particularly if any evidence for bothersomeness or higher prevalence.
Grade A+ indicates unanimous agreement in Tier 1 sources (100%). Addition of minus sign "-" to Grade or Level indicates the presence of disconfirming evidence in that category.

## Sheet: SOFT 1. MOVEMENT DOMAIN
Category/Concept	Coherence in Measurement & Classification		Adequacy of Data					Relevance of Concept
			Tier 1 Grade	Tier 2 & 3 Level	Tier 1	Tier 2	Tier 3	Bothersome	Prevalence
	Concerns	Explanation			6 Studies (%)	13 Studies (%)	18 Studies (%)	mean %	mean %	[Range]
SLOW MOVEMENT		Concept category
Slowed movements	-	No concerns; One Tier 3 study disconfirming presence in early PD	A +	4 -	1	-	0.16	0.29	0.54	[5-83%]
LOSS OF COORDINATION		Concept cateogy
Loss of coordination	Moderate	Variably reported and may confound fine motor with gross motor	B	x	0.5	-	-	0.1	0.14	[5-23%]
FINE MOTOR		Concept category
Altered fine motor dexterity	-	No concerns; No disconfirming evidence	A	4	0.83	-	0.05	0.35	0.85	[71-95%]
STIFFNESS		Concept category
Stiffness/Rigidity	Minor	Variable terminology (stiff, tight, rigid); No disconfirming evidence	A +	4	1	-	0.11	0.24	0.62	[50-69%]
Decreased range of motion	Minor	Inconsistent classification as symptom vs. impact; Limited evidence	D	x	0.33	-	-	0.13	0.17	[5-28%]
Decreased facial expression	-	No concerns; No disconfirming evidence	A +	x	1	-	-	0.03	0.18	[13-27%]
Impaired eye movements	Moderate	Encompasses blinking and pupilomotor control; Definitions needed	D	4	0.17	0.08	0.05	-	0.19	-
WALKING, BALANCE & POSTURE	Minor	Concept category - composite concept blending walking and balance	B	4	0.67	2	-	0.21	0.57	[30-75%]
Impaired balance	-	No concerns; No disconfirming evidence	A +	4	1	-	0.11	0.2	0.41	[7-66%]
Gait changes	Minor	Variable approaches to measurement and multiple subconcepts limits synthesis	A +	4	1	-	0.05	0.32	0.63	[40-86%]
Shuffling	UA	Limited evidence in early PD <3 years	D	x	0.166667	-	-	-	0.11	-
Dragging feet	UA	Limited evidence in early PD <3 years	D	x	0.166667	-	-	-	0.24	-
Altered stride length	UA	Limited evidence in early PD <3 years	D	x	0.166667	-	-	-	0.03	-
Altered stance	UA	No evidence in early PD <3YSD	X	x	-	-	-	-	-	-
Altered turning	UA	Limited evidence in early PD <3YSD	D	x	0.166667	-	-	-	0.05	-
Altered double support time	UA	No evidence in early PD <3YSD	X	x	-	-	-	-	-	-
Staggering	UA	No evidence in early PD <3YSD	X	x	-	-	-	-	-	-
Freezing	-	No concerns; No disconfirming evidence	B	4	0.5	0.0769231	0.0526316	0.03	0.06	[4-16%]
Altered gait velocity	UA	No evidence in early PD <3YSD	X	x	-	-	-	-	-	-
Altered arm Swing	-	No concerns; No disconfirming evidence	B	x	0.5	-	-	0.05	0.55	[38-71%]
Postural changes	-	No concerns; No disconfirming evidence	A +	x	1	-	-	0.04	0.15	-
TREMOR		Concept category
Tremor	-	No concerns; No disconfirming evidence	A +	4	1	0.15	0.11	0.57	0.85	[42-100%]
Sense of internal tremor	-	Sometimes confounded with "vibratory" sense	B	2	0.5	-	-	0.01	0.09	[8-9%]
OTHER INVOLUNTARY MOVEMENT		Concept category
Cramping/spasm	-	Variable terminology (cramping, spasms, dystonia); No disconfirming evidence	A	x	0.83	-	-	0.09	0.3	[20-41%]
Restless legs	Minor	Inconsistent classification as MS vs. NMS; One Tier 1 source disconfirming	B -	x	0.5	-	-	0.01	0.13	[0-38%]
Twitching	Moderate	Inconsistent terminology (twitching, jerking); no disconfirming evidence	D	x	0.17	-	-	-	0.3	-
Dyskinesias	Severe	Inconsistent and disconfirming evidence all Tiers	B -	4 -	0.67	0.08	-	0.02	0.11	[0-2%]
Notes. PD= Parkinson's disease; UA=Unable to assess due to limited data; YSD=Years since diagnosis of Parkinson's disease; Tier 1 Grade A+=100% (Green), A=75-99% (Green), B=50-74% (Yellow), C=25-49% (Orange), D=1-24% (Gray), X=No studies supporting presence in early PD (Black); Tier 2 & 3 Level 1=75-100% (Green), 2=50-74% (Yellow), 3=25-49% (Orange), 4=1-24% (Gray), x=No Tier 2 or 3 studies suppo…

## Sheet: SOFT 2. COGNITIVE DOMAIN
Category/Concept	Coherence in Measurement & Classification		Adequacy of Data					Relevance of Concept
			Tier 1 Grade	Tier 2 & 3 Level	Tier 1	Tier 2	Tier 3	Bothersome	Prevalence
	Concerns	Explanation			6 Studies (%)	13 Studies (%)	18 Studies (%)	mean %	mean %	[Range]
MEMORY		Concept category encompassing different aspects of memory
Impaired memory	Moderate	Unclear what is being measured in many study reports	A +	3	1	0.31	0.05	0.14	0.38	[17-65%]
Forgetting to do things	UA	Limited evidence; No disconfirming evidence	X	4	0	0.08	0	-	-	-
Impaired visual Memory	UA	Limited evidence; No disconfirming evidence	X	4	0	0	0.05	-	-	-
Trouble learning	UA	Expert proposed concept; Missing evidence in early PD	X	x	0	0	0	-	-	-
EXECUTIVE FUNCTION	Moderate	Concept category; Unclear how concept is being measured	B	4	0.5	0	0.11	0.03	0.24	-
Decreased mental flexibility	UA	Expert proposed concept; Missing evidence in early PD	X	x	0	0	0	-	-	-
impaired ability to multitask	UA	Limited evidence; No disconfirming evidence	C	x	0.33	0	0	0.03	0.14	-
LANGUAGE		Concept category aligning with state of science
Difficulty word finding	Minor	One large Tier 1 study found no evidence of bothersomeness at early stage	A -	x	0.83	0	0	0.17	0.42	[19-65%]
VISUOSPATIAL		Concept category encompassing different visuospatial abilities
Impaired depth perception	UA	Limited evidence; One Tier 1 study disconfirming presence in early PD <3YSD	D -	4	0.17	0	0.11	0.03	0.25	-
Difficulty finding way	UA	Limited evidence; no disconfirming evidence	C	x	0.33	0	0	0.04	0.1	-
ATTENTION & PROCESSING		Concept category
Impaired attention	-	No disconfirming evidence	B	x	0.5	0	0	0.11	0.25	[24-25%]
Impaired concentration	-	No disconfirming evidence	A +	4	1	0.23	0	0.11	0.28	[14-63%]
Slower thinking	-	No disconfirming evidence	B	x	0.67	0	0	0.12	0.42	[30-53%]
Impaired mental alertness (fog)	-	No disconfirming evidence	B	x	0.67	0	0	0.05	0.24	[8-40%]
DIAGNOSTIC CLASSIFICATION
Mild cognitive impairment	Moderate	No disconfirming evidence, unclear if clinical classification or self-report	C	3	0.33	0.15	0.32	-	0.3	[25-35%]
Dementia	Severe	No evidence supporting presence in PD <3YSD; Disconfirming evidence in Tier 2	X	x -	0	0	0	-	-	-
Notes. PD= Parkinson's disease; UA=Unable to assess due to limited data; YSD=Years since diagnosis of Parkinson's disease; Tier 1 Grade A+=100% (Green), A=75-99% (Green), B=50-74% (Yellow), C=25-49% (Orange), D=1-24% (Gray), X=No studies supporting presence in early PD (Black); Tier 2 & 3 Level 1=75-100% (Green), 2=50-74% (Yellow), 3=25-49% (Orange), 4=1-24% (Gray), x=No Tier 2 or 3 studies suppo…

## Sheet: SOFT 3. PSYCHIATRIC DOMAIN
Category/Concept	Coherence in Measurement & Classification		Adequacy of Data					Relevance of Concept
			Tier 1 Grade	Tier 2 & 3 Level	Tier 1	Tier 2	Tier 3	Bothersome	Prevalence
	Concerns	Explanation			6 Studies (%)	13 Studies (%)	18 Studies (%)	mean %	mean %	[Range]
MOOD & AFFECT		Concept category; No disconfirming evidence	B	4				0.25	0.47	[35-59%]
Apathy	Minor	One study Tier 3 disconfirming presence in early PD <3YSD	A	3 -	0.83	0.46	0.11	0.05	0.23	[5-58%]
Loss of interest	Moderate	Appears to overlap with concept of apathy	C	4	0.33	0.15	0	-	0.24	[14-35%]
Decreased goal directed behavior	UA	Expert proposed concept; missing evidence in early PD	X	x	-	-	-	-	-	-
Anxious mood	Minor	One study Tier 3 disconfirming elevated presence in early PD <3YSD	A +	3 -	1	0.38	0.16	0.21	0.45	[12-74%]
Social phobia	UA	No evidence in early PD <3YSD	X	x	-	-	-	-	-	-
Panic	UA	Minimal evidence in early PD <3YSD	D	x	0.17	-	-	-	0.14	-
Excessive worrying	UA	Expert proposed concept; missing evidence in early PD
Depressed mood	Moderate	Unclear if clinical diagnosis or symptoms of depressed mood	A +	3	1	0.38	0.47	0.077	0.34	[10-59%]
Low or flat mood	UA	Patient panel strongly advocates to retain concept as distinct from depression	C	4	0.33	0.08	-	-	0.27	[19-38%]
Feelings of sadness	Moderate	Potential overlap with depression/depressed mood; Not reported in PD <3YSD	X	x	-	-	-	-	-	-
Loss of pleasure	UA	Minimal evidence in early PD <3YSD	D	x	0.17	-	-	-	0.3	-
Negative feelings/emotions	UA	Patient panel strongly advocates to retain concept as distinct from depression	C	x	0.33	-	-	0.27	0.3	-
Suicidal ideation/thoughts of death	UA	Limited evidence in early PD <3YSD	C	x	0.33	-	-	0.01	0.03	-
Emotional lability	New	Category suggested by patient panel
Pseudobulbar affect	UA	No supporting evidence in early PD; One study disconfirming in Tier 1	X -	x	-	-	-
Irritability	UA	Patient panel advocates for inclusion as a symptom	D	4	0.17	0.08	0.05	0.01	0.14	[1-18%]
Euphoria	Minor	Limited evidence; One Tier 3 study disconfirming presence in early PD <3YSD	X	x -	-	0.08	-
Agitation	UA	Minimal evidence in early PD <3YSD	X	4	-	0.08	0.05	-	0.13	[12-13%]
BEHAVIORS		Expert proposed concept category
Impulsive-compulsive behaviors	UA	One Tier 1 study disconfirming presence in PD <3YSD; Very limited evidence	X -	4	-	0.08	-	-	0.1	-
Medication use	UA	Very limited evidence in early PD <3YSD	X	4	-	0.08	-	-	0.02	-
Buying	UA	Very limited evidence in early PD <3YSD	X	4	-	0.08	-	-	0.04	-
Eating	UA	Very limited evidence in early PD <3YSD	X	4	-	0.08	-	-	0.05	-
Sexual	UA	Very limited evidence in early PD <3YSD	X	4	-	0.08	-	-	0.05	-
Punding	UA	Very limited evidence in early PD <3YSD	X	4	-	0.08	-	-	0.05	-
Gambling	UA	Very limited evidence in early PD <3YSD	X	4	-	0.08	-	-	0.01	-
Walkabout	UA	Very limited evidence in early PD <3YSD	X	4	-	0.08	-	-	0.01	-
Hobbyism	UA	Very limited evidence in early PD <3YSD	X	4	-	0.08	-	-	0.11	-
Subsyndromal ICD	UA	Diagnostic classification: Minimal evidence in early PD <3YSD	X	4	-	0.08	-	-	0.1	-
ICD	UA	Diagnostic classification: Minimal evidence in early PD <3YSD	X	4	-	0.08	-	-	0.25	-
PSYCHOSIS		Expert proposed concept category	X	x	-	-	-
Psychosis	UA	Minimal evidence in early PD <3YSD	X	x	-	0.15	-	-	-	-
Minor psychosis	UA	Expert proposed concept; missing evidence in early PD	X	x	-	-	-	-	-	-
Delusions	UA	Minimal evidence in early PD <3YSD	X	4	-	0.15	-	-	0.02	-
Hallucinations	UA	Minimal evidence in early PD <3YSD	D	4	0.17	0.23	-	0.01	0.04
PERSONALITY CHANGES		Expert proposed concept category			0.17	0.08	0.11
Personality changes	UA	Very limited evidence in early PD <3YSD	D	4	0.17	0.23	-	0.01	-	-
Excessive persistence	Moderate	Concern for overlap with perseveration; No evidence early PD <3YSD	X	x	-	0.15	-	-	-	-
Reward seeking behavior	UA	No evidence in early PD <3YSD	X	x	-	0.15	-	-	-	-
Disinhibitions	UA	Minimal evidence in early PD <3YSD	X	4	-	0.15	-	-	0.02	-
Neuroticism	UA	No evidence in early PD <3YSD	X	x	-	0.15	-	-	-	-
Impaired emotion recognition	UA	No evidence in early PD <3YSD	X	x	-	0.15	-	-	-	-
Low novelty seeking	UA	No evidence in early PD <3YSD	X	x	-	0.15	-	-	-	-
Notes. PD= Parkinson's disease; UA=Unable to assess due to limited data; YSD=Years since diagnosis of Parkinson's disease; Tier 1 Grade A+=100% (Green), A=75-99% (Green), B=50-74% (Yellow), C=25-49% (Orange), D=1-24% (Gray), X=No studies supporting presence in early PD (Black); Tier 2 & 3 Level 1=75-100% (Green), 2=50-74% (Yellow), 3=25-49% (Orange), 4=1-24% (Gray), x=No Tier 2 or 3 studies suppo…

## Sheet: SOFT 4. SENSORY DOMAIN
Category/Concept	Coherence in Measurement & Classification		Adequacy of Data					Relevance of Concept
			Tier 1 Grade	Tier 2 & 3 Level	Tier 1	Tier 2	Tier 3	Bothersome	Prevalence
	Concerns	Explanation			6 Studies (%)	13 Studies (%)	18 Studies (%)	mean %	mean %	[Range]
FIVE SENSES		Proposed concept category
Vision	Moderate	Ambiguity in what is being measured	B	x	0.67	-	-	0.01	0.09	[5-11%]
Light sensitivity	UA	Very limited data	X	4	-	0.23	-	-	0.21	[2-27%]
Double vision	UA	Limited data; One Tier 1 study disconfirming presence in early PD <3YSD	D -	4	0.17	0.23	-	-	0.05	[3-7%]
Dry eyes	UA	Very limited data	D	x	0.17	-	-	-	0.03	-
Altered taste	UA	Limited data	D	4	0.17	0.08	-	0.01	0.25	-
Altered smell	-	Strong evidence all Tiers	A	3	0.83	0.31	0.16	0.02	0.29	[16-50%]
Impaired hearing	UA	Limited data	D	x	0.17	-	-	-	0.05	-
Impaired sensation	Moderate	Inconsistent use in terminology for touch subconcepts	B	x	0.5	-	-	0.02	0.16	[1-29%]
Impaired sensation in hands/feet	Moderate	Peripheral neuropathy (diagnosis) used interchangeably with numbness	D	4	0.17	-	0.05	-	0.27	[15-38%]
Impaired vibratory sense	Moderate	Vibratory sense colloquially confounded with tremor	X	4	-	-	0.05	-	0.55	-
Numbness	Moderate	Peripheral neuropathy (diagnosis) used interchageably with numbness	C	x	0.33	-	-	0.03	0.15
Impaired temperature sensation	Severe	No evidence in early PD <3YSD; One Tier 1 study disconfirming; Inconsistent terms	X -	x	-	-	-	0.03	-	-
Tingling	Moderate	Often reported as merged concept numbness/tingling	C	x	0.33	-	-	-	0.13	[11-15%]
OTHER SENSATIONS		Proposed concept category
Pain (general)	Minor	Non-specific - unclear what "pain" encompasses	A +	3	1	0.38	-	0.28	0.38	[8-59%]
Headaches	UA	Limited data	D	x	0.17	-	-	0.01	-	-
Fatigue/lack of energy	Minor	Often reported as tired/fatigued; one Tier 3 study disconfirming	A +	3 -	1	0.31	-	0.28	0.5	[20-76%]
Physical fatigue	-	No disconfirming evidence	C	x	0.33	-	-	0.33	0.35	[33-35%]
Mental fatigue	-	No disconfirming evidence	B	x	0.5	-	-	0.01	0.08	[1-8%]
Breathlessness (dyspnea)	Moderate	No evidence supporting presence in early PD <3yrs; Disconfirming evidence in Tier 1	X -	x	-	-	-	-	-	-
Muscle weakness	-	No disconfirming evidence	B	x	0.67	-	-	0.04	0.2	[15-27%]
Heaviness	UA	Very limited data	D	x	0.17	-	-	-	0.05	-
Impaired body temperature control	Severe	Confused with thermoregulation (autonomic); One Tier 1 study disconfirming	C -	4	0.33	0.08	-	0.02	0.25	[3-57%]
Heat intolerance	UA	No Tier 1 evidence; very limited data	X	4	-	0.23	-	-	0.19	-
Cold intolerance	UA	No Tier 1 evidence; very limited data	X	4	-	0.23	-	-	0.27	-
Notes. PD= Parkinson's disease; UA=Unable to assess due to limited data; YSD=Years since diagnosis of Parkinson's disease; Tier 1 Grade A+=100% (Green), A=75-99% (Green), B=50-74% (Yellow), C=25-49% (Orange), D=1-24% (Gray), X=No studies supporting presence in early PD (Black); Tier 2 & 3 Level 1=75-100% (Green), 2=50-74% (Yellow), 3=25-49% (Orange), 4=1-24% (Gray), x=No Tier 2 or 3 studies suppo…

## Sheet: SOFT 5. SLEEP DOMAIN
Category/Concept	Coherence in Measurement & Classification		Adequacy of Data					Relevance of Concept
			Tier 1 Grade	Tier 2 & 3 Level	Tier 1	Tier 2	Tier 3	Bothersome	Prevalence
	Concerns	Explanation			6 Studies (%)	13 Studies (%)	18 Studies (%)	mean %	mean %	[Range]
SLEEP DISTURBANCES	Moderate	Inconsistent terms; One Tier 3 study disconfirming elevated presence in early PD	A +	2 -	1	0.62	0.21	0.13	0.52	[13-69%]
Reduced sleep quality		Limited evidence	D	x	0.17	-	-	-	0.16	-
Insomnia	-	Strong evidence for presence in early PD <3YSD	B	3	0.666667	0.38	-	0.22	0.23	[5-59%]
Difficulty falling asleep	-	Limited evidence	D	x	0.166667	-	-	0.019	-	-
Difficulty staying asleep	-	No issues	C	x	0.333333	-	-	0.065	0.41	-
Early morning awakening	UA	No evidence in early PD; One Tier 1 study disconfirming presence in early PD <3YSD	X -	x	-	-	-	-	-	-
Altered sleep duration and efficiency	UA	One Tier 3 study disconfirming; Unclear terminology; Needs definitions	X	x -	-	-	-	-	-	-
Sleep walking	UA	Limited evidence	D	x	0.17	-	-	-	0.05	-
RSBD					1	0.38	0.21
REM Sleep Behavior Disorder (RBD)	Moderate	May encompass multiple experiences	A +	3	1	0.38	0.26	0.0513333	0.29	[11-39%]
Vivid dreams	Moderate	Unclear if different from RSBD	B	3	0.5	0.31	-	0.07	0.2	[7-31%]
Unpleasant dreams	Moderate	May or may not be component of RBSD; unclear category	D	x	0.17	-	-	-	0.14	-
DAYTIME SLEEPINESS	Moderate	Unclear what level of sleepiness consistitutes excessive daytime sleepiness	A +	4	1	0.23	0.11	0.0786667	0.26	[3-54%]
Notes. PD= Parkinson's disease; UA=Unable to assess due to limited data; YSD=Years since diagnosis of Parkinson's disease; Tier 1 Grade A+=100% (Green), A=75-99% (Green), B=50-74% (Yellow), C=25-49% (Orange), D=1-24% (Gray), X=No studies supporting presence in early PD (Black); Tier 2 & 3 Level 1=75-100% (Green), 2=50-74% (Yellow), 3=25-49% (Orange), 4=1-24% (Gray), x=No Tier 2 or 3 studies suppo…

[truncated: 7 more sheets: SOFT 6. SPEECH DOMAIN, SOFT 7 .DIGESTIVE DOMAIN, SOFT 8. URINARY DOMAIN, SOFT 9. SEXUAL DOMAIN, SOFT 10. AUTONOMIC DOMAIN, SOFT 11. PHYSICAL IMPACTS , SOFT 12. PSYCHOSOCIAL IMPACTS ]
