# Supplementary material for: A consensus conceptual model of meaningful symptoms and functional impacts in early Parkinson’s Disease
Source: Research Square preprint supplement (doi:10.21203/rs.3.rs-4377805/v1), 2024-07-03
Supplement: Supplementary file 1 [file 09426b9f4dd37dd0a9adea65.pdf]

# SPEECH DOMAIN (SYMPTOMS)

| Category/Concept               | Coherence in Measurement & Classification |                                                                          | Adequacy of Data |                  | Relevance of Concept |                   |                    |
|--------------------------------|-------------------------------------------|--------------------------------------------------------------------------|------------------|------------------|----------------------|-------------------|--------------------|
|                                | Concerns                                  | Explanation                                                              | Tier 1 Grade     | Tier 2 & 3 Level | Bothersome mean %    | Prevalence mean % | Prevalence [Range] |
| SPEECH CHANGES                 | -                                         | Concept category                                                         | A +              | 4                | 14%                  | 45%               | [7-66%]            |
| Impaired articulation          | Moderate                                  | One Tier 1 study disconfirming presence in early PD <3YSD                | C -              | 4                | 6%                   | 29%               | [6-38%]            |
| Impaired verbal fluency        | Moderate                                  | Unclear definition of term; May overlap with cognitive word finding      | D                | x                | -                    | 5%                | -                  |
| VOICE CHANGES                  | -                                         | Concept category                                                         | B                | x                | 2%                   | -                 | -                  |
| Impaired phonation             | UA                                        | Limited evidence; No disconfirming evidence                              | X                | 4                | -                    | -                 | -                  |
| Monotone (Prosodic impairment) | UA                                        | Limited evidence; No disconfirming evidence                              | D                | x                | 6%                   | 31%               | [6-31%]            |
| Quiet voice                    | -                                         | No disconfirming evidence                                                | B                | x                | 6%                   | 66%               | [2-79%]            |
| Altered voice quality          | -                                         | Important to retain per patient panel; Distinct from other voice changes | B                | x                | 6%                   | 32%               | [6-49%]            |

**Notes.** PD= Parkinson's disease; UA=Unable to assess due to limited data; YSD=Years since diagnosis of Parkinson's disease; **Tier 1 Grade** A+=100% (Green), A=75-99% (Green), B=50-74% (Yellow), C=25-49% (Orange), D=1-24% (Gray), X=No studies supporting presence in early PD (Black); **Tier 2 & 3 Level** 1=75-100% (Green), 2=50-74% (Yellow), 3=25-49% (Orange), 4=1-24% (Gray), x=No Tier 2 or 3 studies supporting presence in early PD (Black). Minus sign "-" in Grade or Level indicates presence of disconfirming evidence. Color coding is used for visual identification of concepts with greater supporting evidence in Grade and Level. For bothersomeness and prevalence, darker colors indicate higher average frequency in studies reporting.
