# Supplementary material for: A consensus conceptual model of meaningful symptoms and functional impacts in early Parkinson’s Disease
Source: Research Square preprint supplement (doi:10.21203/rs.3.rs-4377805/v1), 2024-07-03
Supplement: Supplementary file 2 [file 198557e3cfb01e2405023931.pdf]

**Table 1. Stakeholder participation in development of the consensus conceptual model**

| Stakeholder group                                                                                                                                                   | Investment                                                                                                                                                                                                                                                                                                                                                                                                                                                                                                                                                                                            |
|---------------------------------------------------------------------------------------------------------------------------------------------------------------------|-------------------------------------------------------------------------------------------------------------------------------------------------------------------------------------------------------------------------------------------------------------------------------------------------------------------------------------------------------------------------------------------------------------------------------------------------------------------------------------------------------------------------------------------------------------------------------------------------------|
| <b>People affected by PD</b> <ul style="list-style-type: none"> <li>Patients</li> <li>Families (Spouse/partners, children, close friends)</li> </ul>                | <ul style="list-style-type: none"> <li><b>Taskforce member:</b> PwP representative at monthly taskforce meetings to consult on approach, progress, and co-author final product</li> <li><b>Advisory panel:</b> Ethnically and gender diverse 9-member patient advisory panel convened to (A) review and advise on approach developed by taskforce; (B) provide iterative real-time feedback on model structure, terminology, presentation, and potential uses; (C) review and provide feedback on final manuscript and results; (D) co-authors on final manuscript. Panel characteristics:</li> </ul> |
| <b>Clinicians</b> (Neurology, PCP, Nursing, Speech/PT)                                                                                                              | <p><b>Multi-stakeholder taskforce convened monthly to:</b></p> <ul style="list-style-type: none"> <li>Co-develop approach</li> <li>Monitor progress</li> <li>Advise on data extraction and meta-synthesis</li> <li>Critique and iteratively revise model and outputs</li> <li>Co-author presentations, publications</li> </ul> <p><b>Public Review Period</b></p> <ul style="list-style-type: none"> <li>One-month public review period to provide feedback on final report.</li> </ul>                                                                                                               |
| <b>Researchers</b> <ul style="list-style-type: none"> <li>Model developers; PD staging experts, Topical experts</li> </ul>                                          |                                                                                                                                                                                                                                                                                                                                                                                                                                                                                                                                                                                                       |
| <b>PD Advocacy Groups</b> <ul style="list-style-type: none"> <li>Michael J Fox Foundation</li> <li>Parkinson's UK</li> </ul>                                        |                                                                                                                                                                                                                                                                                                                                                                                                                                                                                                                                                                                                       |
| <b>Industry</b> <ul style="list-style-type: none"> <li>Roche, AbbVie, GSK, Roche, Denali, UCB</li> </ul>                                                            |                                                                                                                                                                                                                                                                                                                                                                                                                                                                                                                                                                                                       |
| <b>Representatives of professional agencies</b> <ul style="list-style-type: none"> <li>Critical Path for Parkinson's</li> <li>Movement Disorders Society</li> </ul> |                                                                                                                                                                                                                                                                                                                                                                                                                                                                                                                                                                                                       |
| <b>Regulatory</b> <ul style="list-style-type: none"> <li>FDA</li> <li>National Council on Aging</li> <li>CMS (Center for Medicare Services)</li> </ul>              | <ul style="list-style-type: none"> <li>Review and provide feedback on draft methods and results.</li> <li>Review and provide feedback on final report</li> </ul>                                                                                                                                                                                                                                                                                                                                                                                                                                      |
