# Supplementary material for: A consensus conceptual model of meaningful symptoms and functional impacts in early Parkinson’s Disease
Source: Research Square preprint supplement (doi:10.21203/rs.3.rs-4377805/v1), 2024-07-03
Supplement: Supplementary file 3 [file 292ff8e2f891974f59f76650.pdf]

# DIGESTIVE DOMAIN (SYMPTOMS)

| Category/Concept                       |          | Coherence in Measurement & Classification                                             |              | Adequacy of Data |                   | Relevance of Concept |          |
|----------------------------------------|----------|---------------------------------------------------------------------------------------|--------------|------------------|-------------------|----------------------|----------|
|                                        | Concerns | Explanation                                                                           | Tier 1 Grade | Tier 2 & 3 Level | Bothersome mean % | Prevalence mean %    | [Range]  |
| MOUTH & THROAT SYMPTOMS                |          | Proposed concept category                                                             |              |                  |                   |                      |          |
| Saliva control                         |          | Proposed concept                                                                      |              |                  |                   |                      |          |
| <i>Droping</i>                         | Moderate | One Tier 1 study disconfirming presence in early PD <3 YSD                            | B -          | 2                | -                 | 30%                  | [13-49%] |
| <i>Dry mouth</i>                       | UA       | One Tier 1 study disconfirming presence in early PD <3 YSD                            | C -          | x                | -                 | 3%                   | -        |
| Chewing & Swallowing                   | Moderate | Double barrelled; Unclear if experienced separably by PwP                             | A +          | 2                | -                 | -                    | -        |
| <i>Chewing</i>                         | UA       | No disconfirming evidence                                                             | D            | 4                | 5%                | 22%                  | [14-30%] |
| <i>Globus sensation</i>                | UA       | Sensory perception of obstruction; Not patient oriented                               | X            | 4                | -                 | 17%                  | -        |
| <i>Dysphagia</i>                       | Moderate | Diagnostic classification may comprise multiple experiences; Not patient oriented     | X            | 3                | -                 | 15%                  | [7-21%]  |
| <i>Impaired swallowing</i>             | Moderate | No disconfirming evidence; Overlap with choking                                       | A +          | 3                | -                 | 22%                  | [1-35%]  |
| <i>Choking</i>                         | Moderate | One Tier 1 study disconfirming presence in early PD <3YSD; Overlap with swallowing    | D -          | 4                | 9%                | 19%                  | [13-28%] |
| <i>Pain during swallow</i>             | UA       | Limited evidence; No disconfirming evidence                                           | D            | 4                | 1%                | 6%                   | -        |
| <i>Altered esophageal transit time</i> | UA       | Not patient oriented                                                                  | X            | x                | -                 | -                    | -        |
| Eating problems NOS                    | Severe   | Unclear definition and use; May comprise multiple experiences                         | X            | x                | -                 | -                    | -        |
| STOMACH SYMPTOMS                       |          | Proposed concept category                                                             |              |                  |                   |                      |          |
| Acid reflux/heartburn                  | UA       | Limited evidence; No disconfirming evidence                                           | X            | 4                | -                 | 7%                   | -        |
| Early fullness (satiety)               | Severe   | Unclear definition of concept                                                         | X            | 3                | -                 | 15%                  | [5-21%]  |
| Abdominal pain                         | UA       | Limited evidence; No disconfirming evidence                                           | D            | 4                | 1%                | 9%                   | -        |
| Nausea & Vomiting                      | Severe   | Double barreled; One Tier 1 study disconfirming in early PD; Measure separately       | C -          | 4                | 1%                | 5%                   | [2-11%]  |
| Bloating/fullness                      | UA       | Limited evidence; No disconfirming evidence                                           | D            | 4                | 1%                | 15%                  | -        |
| Appetite changes                       | Severe   | May overlap with early satiety/fullness; Two Tier 1 studies disconfirming in early PD | D -          | 4                | -                 | 10%                  | [5-15%]  |
| BOWEL SYMPTOMS                         |          | Proposed concept category                                                             |              |                  |                   |                      |          |
| Constipation                           | -        | Strong evidence all Tiers                                                             | A +          | 1                | 7%                | 29%                  | [10-46%] |
| <i>Tenesmus</i>                        | -        | Limited evidence; No disconfirming evidence; Not patient oriented                     | X            | 4                | -                 | 20%                  | -        |
| <i>Straining during BM</i>             | Moderate | Limited evidence; No disconfirming evidence; may overlap with constipation            | X            | 3                | -                 | 42%                  | [29-55%] |
| Problems with bowel emptying           |          | Proposed concept                                                                      | D            | 4                |                   | 13%                  | [6-17%]  |
| <i>Bowel urgency</i>                   | Moderate | One Tier 1 study disconfirming presence in early PD <3 YSD                            | X -          | x                | -                 | -                    | -        |
| <i>Bowel incontinence</i>              | Severe   | Inconsistent and disconfirming evidence in all Tiers for early PD <3YSD               | X -          | 3 -              | -                 | 5%                   | [1-7%]   |
| <i>Impaired anal sphincter control</i> | UA       | Limited evidence; No disconfirming evidence; Not patient oriented                     | X            | 4                | -                 | 11%                  | -        |

## DIGESTIVE DOMAIN (SYMPTOMS)

|                        |        |                                                          |   |   |   |     |          |
|------------------------|--------|----------------------------------------------------------|---|---|---|-----|----------|
| Diarrhea               | -      | Limited evidence; No disconfirming evidence              | X | 4 | - | 4%  | -        |
| General GI dysfunction | Severe | Non-specific; Comprises many diverse symptom experiences | X | 4 | - | 58% | [17-81%] |

**Notes.** PD= Parkinson's disease; UA=Unable to assess due to limited data; YSD=Years since diagnosis of Parkinson's disease; **Tier 1 Grade** A+=100% (Green), A=75-99% (Green), B=50-74% (Yellow), C=25-49% (Orange), D=1-24% (Gray), X=No studies supporting presence in early PD (Black); **Tier 2 & 3 Level** 1=75-100% (Green), 2=50-74% (Yellow), 3=25-49% (Orange), 4=1-24% (Gray), x=No Tier 2 or 3 studies supporting presence in early PD (Black). Minus sign "-" in Grade or Level indicates presence of disconfirming evidence. Color coding is used for visual identification of concepts with greater supporting evidence in Grade and Level. For bothersomeness and prevalence, darker colors indicate higher average frequency in studies reporting.
