# Supplementary material for: A consensus conceptual model of meaningful symptoms and functional impacts in early Parkinson’s Disease
Source: Research Square preprint supplement (doi:10.21203/rs.3.rs-4377805/v1), 2024-07-03
Supplement: Supplementary file 4 [file 30a3b00ae55d9736444637a7.pdf]

# SEXUAL DOMAIN (SYMPTOMS)

| Category/Concept            |          | Coherence in Measurement & Classification                     |                 | Adequacy of Data    |                      | Relevance of Concept |          |
|-----------------------------|----------|---------------------------------------------------------------|-----------------|---------------------|----------------------|----------------------|----------|
|                             | Concerns | Explanation                                                   | Tier 1<br>Grade | Tier 2 & 3<br>Level | Bothersome<br>mean % | Prevalence<br>mean % | [Range]  |
| SEXUAL DYSFUNCTION          | Moderate | Concept category; comprises multiple concepts and experiences | A               | 2                   | 2%                   | 18%                  | [3-62%]  |
| Anorgasmia                  | -        | Limited evidence; No disconfirming evidence                   | X               | 4                   | -                    | 35%                  | [6-62%]  |
| Ejaculatory dysfunction     | -        | Limited evidence; No disconfirming evidence                   | X               | 4                   | -                    | 32%                  | [25-42%] |
| Erectile dysfunction (Male) | -        | Limited evidence; No disconfirming evidence                   | D               | 4                   | 1%                   | 43%                  | [36-52%] |
| Impaired libido             | -        | One Tier 2 study disconfirming presence in early PD <3 YSD    | X               | 4 -                 | -                    | 5%                   | [1-10%]  |
| Vaginal dryness (Female)    | -        | Limited evidence; No disconfirming evidence                   | X               | 4                   | -                    | 29%                  | [6-53%]  |

**Notes.** PD= Parkinson's disease; UA=Unable to assess due to limited data; YSD=Years since diagnosis of Parkinson's disease; **Tier 1 Grade** A+=100% (Green), A=75-99% (Green), B=50-74% (Yellow), C=25-49% (Orange), D=1-24% (Gray), X=No studies supporting presence in early PD (Black); **Tier 2 & 3 Level** 1=75-100% (Green), 2=50-74% (Yellow), 3=25-49% (Orange), 4=1-24% (Gray), x=No Tier 2 or 3 studies supporting presence in early PD (Black). Minus sign "-" in Grade or Level indicates presence of disconfirming evidence. Color coding is used for visual identification of concepts with greater supporting evidence in Grade and Level. For bothersomeness and prevalence, darker colors indicate higher average frequency in studies reporting.
