# Supplementary material for: A consensus conceptual model of meaningful symptoms and functional impacts in early Parkinson’s Disease
Source: Research Square preprint supplement (doi:10.21203/rs.3.rs-4377805/v1), 2024-07-03
Supplement: Supplementary file 5 [file 3e12cbbc1e288096bd1efee4.pdf]

# PSYCHOSOCIAL FUNCTIONING DOMAIN (IMPACTS)

| Category/Concept                 | Coherence in Measurement & Classification |                                                                              | Adequacy of Data |                  | Relevance of Concept |                   |          |
|----------------------------------|-------------------------------------------|------------------------------------------------------------------------------|------------------|------------------|----------------------|-------------------|----------|
|                                  | Concerns                                  | Explanation                                                                  | Tier 1 Grade     | Tier 2 & 3 Level | Bothersome mean %    | Prevalence mean % | [Range]  |
| INDEPENDENCE                     | -                                         | Patient panel proposed concept category                                      | B                | x                | 24%                  | 13%               | -        |
| Cooking/meal preparation         | -                                         | Important aspect of indepenence per patient panel                            | B                | x                | 2%                   | 29%               | [13-28%] |
| Shopping                         | -                                         | Important aspect of indepenence per patient panel; Limited research          | D                | x                | 2%                   | -                 | -        |
| Housework/home maintenance       | -                                         | Important aspect of indepenence per patient panel; Includes gardening        | B                | x                | 2%                   | 39%               | [32-43%] |
| Travel/driving                   | -                                         | Important aspect of indepenence per patient panel                            | B                | x                | -                    | 40%               | [18-53%] |
| SELF-CONCEPT                     | Minor                                     | Concept category; May comprise multiple aspects or specific experiences      | B                | x                | 35%                  | 49%               | [26-72%] |
| Embarassment/self-conscious      | Minor                                     | May have overlap with concept of stigma                                      | B                | x                | 11%                  | 53%               | [43-63%] |
| Feeling stigmatized              | Minor                                     | May have overlap with embarassment/self-conscious; Limited research          | C                | x                | 22%                  | 44%               | -        |
| Self-efficacy                    |                                           | Proposed concept encompassing several aspects of perceived ability to manage | B                | x                | -                    | -                 | -        |
| Decreased self-confidence        | UA                                        | Limited research                                                             | C                | x                | 8%                   | 65%               | -        |
| Sense of helplessness            | UA                                        | Limited research                                                             | C                | x                | -                    | 18%               | [11-25%] |
| Sense PD limits what you can do  | UA                                        | Limited research                                                             | C                | x                | 28%                  | 91%               | -        |
| COPING                           | Minor                                     | Concept category; May comprise multiple aspects or specific experiences      | B                | x                | 29%                  | 18%               | [11-25%] |
| Living with uncertainty          | UA                                        | Limited research                                                             | D                | x                | -                    | 50%               | -        |
| Preoccupation with disease       | Moderate                                  | Limited research: Unclear what constitutes preoccupation; definitions needed | C                | x                | -                    | 41%               | [23-59%] |
| Increased fear                   | Minor                                     | May encompass different specific experiences; definitions needed             | A                | x                | 9%                   | 46%               | [27-59%] |
| Fear of falling                  | Minor                                     | May overlap with fear of future                                              | D                | x                | 7%                   | -                 | -        |
| Fear of the future               | Minor                                     | May overlap with fear of falling                                             | B                | x                | 11%                  | 46%               | [27-59%] |
| Avoidance                        | Moderate                                  | Unclear in reference to what; definitions needed                             | C                | x                | -                    | 12%               | [6-17%]  |
| Denial                           | Minor                                     | One Tier 1 study disconfirming presence in early PD <3YSD                    | D -              | x                | -                    | 34%               | -        |
| Concealing diagnosis             | UA                                        | Limited research                                                             | D                | x                | -                    | 19%               | -        |
| Annoyance/bothered               | Moderate                                  | May overlap with Frustration/anger; definitions needed                       | D                | x                | -                    | 69%               | -        |
| Frustration/anger                | Moderate                                  | May overlap with Annoyance/bothered; definitions needed                      | B                | x                | 6%                   | 24%               | [20-27%] |
| Stress/distress                  | Moderate                                  | May overlap with Annoyance/bothered; definitions needed                      | B                | x                | 9%                   | 27%               | [14-44%] |
| Finding ways to compensate       | UA                                        | Limited research; Patient panel recommendation to include positive impacts   | D                | x                | -                    | 53%               | -        |
| Positive changes to take control | UA                                        | Limited research; Patient panel recommendation to include positive impacts   | D                | x                | -                    | 47%               | -        |
| INTERPERSONAL INTERACTIONS       | -                                         | Patient panel proposed concept category                                      | D                | x                | 19%                  | -                 | -        |
| Relationships with others        | Minor                                     | Variably includes family, friends, co-workers                                | B                | x                | 9%                   | 53%               | [30-66%] |
| Others perceptions/reactions     | Severe                                    | Ambiguous concept; Needs definition                                          | D                | x                | -                    | 11%               | -        |
| Communication                    | Moderate                                  | May included written or spoken; Needs definition                             | A                | x                | 9%                   | 39%               | [19-75%] |
| Loneliness/isolation             | -                                         | No concerns                                                                  | A                | x                | 1%                   | 22%               | [16-31%] |

## PSYCHOSOCIAL FUNCTIONING DOMAIN (IMPACTS)

|                                |          |                                                                    |     |   |     |     |          |
|--------------------------------|----------|--------------------------------------------------------------------|-----|---|-----|-----|----------|
| ROLES & RESPONSIBILITIES       |          | Patient panel proposed concept category                            |     |   |     |     |          |
| Taking care of family          | UA       | Limited research; No disconfirming evidence                        | C   | x | 2%  | 3%  | -        |
| Taking care of pets            | UA       | Limited research; No disconfirming evidence                        | C   | x | 1%  | 3%  | -        |
| Impact on Job/profession       | -        | No disconfirming evidence                                          | B   | x | 11% | 54% | [40-72%] |
| Financial impact/paying bills  | Moderate | One Tier 1 study disconfirming presence in early PD                | D - | x | -   | 3%  | -        |
| IMPORTANT ACTIVITIES           |          | Patient panel proposed concept category                            |     |   |     |     |          |
| Pleasurable activities         | Moderate | Very limited research; may overlap with other concepts in category | D   | x | 19% | -   | -        |
| Loss of things you enjoy       | Moderate | Very limited research; may overlap with other concepts in category | D   | x | 14% | -   | -        |
| Social life                    | UA       | Very limited research                                              | D   | x | 17% | -   | -        |
| Playing an instrument          | UA       | Limited research; may overlap with other concepts in category      | C   | x | 2%  | 13% | -        |
| Spiritual/Religious activities | UA       | Very limited research                                              | D   | x | -   | 9%  | -        |
| Hobbies & liesure activities   | Moderate | May overlap with other concepts in category                        | A   | 4 | 2%  | 47% | [34-86%] |

**Notes.** PD= Parkinson's disease; UA=Unable to assess due to limited data; YSD=Years since diagnosis of Parkinson's disease; **Tier 1 Grade** A+=100% (Green), A=75-99% (Green), B=50-74% (Yellow), C=25-49% (Orange), D=1-24% (Gray), X=No studies supporting presence in early PD (Black); **Tier 2 & 3 Level** 1=75-100% (Green), 2=50-74% (Yellow), 3=25-49% (Orange), 4=1-24% (Gray), x=No Tier 2 or 3 studies supporting presence in early PD (Black). Minus sign "-" in Grade or Level indicates presence of disconfirming evidence. Color coding is used for visual identification of concepts with greater supporting evidence in Grade and Level. For bothersomeness and prevalence, darker colors indicate higher average frequency in studies reporting.
