# Supplementary material for: A consensus conceptual model of meaningful symptoms and functional impacts in early Parkinson’s Disease
Source: Research Square preprint supplement (doi:10.21203/rs.3.rs-4377805/v1), 2024-07-03
Supplement: Supplementary file 6 [file 4b35c387b84c97de96f9fc05.pdf]

## SLEEP DOMAIN (SYMPTOMS)

| Category/Concept                      | Coherence in Measurement & Classification |                                                                                    | Adequacy of Data |                  | Relevance of Concept |                   |                    |
|---------------------------------------|-------------------------------------------|------------------------------------------------------------------------------------|------------------|------------------|----------------------|-------------------|--------------------|
|                                       | Concerns                                  | Explanation                                                                        | Tier 1 Grade     | Tier 2 & 3 Level | Bothersome mean %    | Prevalence mean % | Prevalence [Range] |
| <b>SLEEP DISTURBANCES</b>             |                                           |                                                                                    |                  |                  |                      |                   |                    |
| Reduced sleep quality                 | Moderate                                  | Inconsistent terms; One Tier 3 study disconfirming elevated presence in early PD   | A +              | 2 -              | 13%                  | 52%               | [13-69%]           |
| Insomnia                              | -                                         | Limited evidence                                                                   | D                | x                | -                    | 16%               | -                  |
| Difficulty falling asleep             | -                                         | Strong evidence for presence in early PD <3YSD                                     | B                | 3                | 22%                  | 23%               | [5-59%]            |
| Difficulty staying asleep             | -                                         | Limited evidence                                                                   | D                | x                | 2%                   | -                 | -                  |
| Early morning awakening               | -                                         | No issues                                                                          | C                | x                | 7%                   | 41%               | -                  |
| Altered sleep duration and efficiency | UA                                        | No evidence in early PD; One Tier 1 study disconfirming presence in early PD <3YSD | X -              | x                | -                    | -                 | -                  |
| Sleep walking                         | UA                                        | One Tier 3 study disconfirming; Unclear terminology; Needs definitions             | X                | x -              | -                    | -                 | -                  |
|                                       | UA                                        | Limited evidence                                                                   | D                | x                | -                    | 5%                | -                  |
| <b>RSBD</b>                           |                                           |                                                                                    |                  |                  |                      |                   |                    |
| REM Sleep Behavior Disorder (RBD)     | Moderate                                  | May encompass multiple experiences                                                 | A +              | 3                | 5%                   | 29%               | [11-39%]           |
| Vivid dreams                          | Moderate                                  | Unclear if different from RSBD                                                     | B                | 3                | 7%                   | 20%               | [7-31%]            |
| Unpleasant dreams                     | Moderate                                  | May or may not be component of RBD; unclear category                               | D                | x                | -                    | 14%               | -                  |
| <b>DAYTIME SLEEPINESS</b>             | Moderate                                  | Unclear what level of sleepiness constitutes excessive daytime sleepiness          | A +              | 4                | 8%                   | 26%               | [3-54%]            |

**Notes.** PD= Parkinson's disease; UA=Unable to assess due to limited data; YSD=Years since diagnosis of Parkinson's disease; **Tier 1 Grade** A+=100% (Green), A=75-99% (Green), B=50-74% (Yellow), C=25-49% (Orange), D=1-24% (Gray), X=No studies supporting presence in early PD (Black); **Tier 2 & 3 Level** 1=75-100% (Green), 2=50-74% (Yellow), 3=25-49% (Orange), 4=1-24% (Gray), x=No Tier 2 or 3 studies supporting presence in early PD (Black). Minus sign "-" in Grade or Level indicates presence of disconfirming evidence. Color coding is used for visual identification of concepts with greater supporting evidence in Grade and Level. For bothersomeness and prevalence, darker colors indicate higher average frequency in studies reporting.
