# Supplementary material for: A consensus conceptual model of meaningful symptoms and functional impacts in early Parkinson’s Disease
Source: Research Square preprint supplement (doi:10.21203/rs.3.rs-4377805/v1), 2024-07-03
Supplement: Supplementary file 7 [file 648c5b942507588f03f233f5.pdf]

# COGNITIVE DOMAIN (SYMPTOMS)

| Category/Concept                  |          | Coherence in Measurement & Classification                                     | Adequacy of Data |                  | Relevance of Concept |                   |          |
|-----------------------------------|----------|-------------------------------------------------------------------------------|------------------|------------------|----------------------|-------------------|----------|
|                                   | Concerns | Explanation                                                                   | Tier 1 Grade     | Tier 2 & 3 Level | Bothersome mean %    | Prevalence mean % | [Range]  |
| <b>MEMORY</b>                     |          | Concept category encompassing different aspects of memory                     |                  |                  |                      |                   |          |
| Impaired memory                   | Moderate | Unclear what is being measured in many study reports                          | A +              | 3                | 14%                  | 38%               | [17-65%] |
| Forgetting to do things           | UA       | Limited evidence; No disconfirming evidence                                   | X                | 4                | -                    | -                 | -        |
| Impaired visual Memory            | UA       | Limited evidence; No disconfirming evidence                                   | X                | 4                | -                    | -                 | -        |
| Trouble learning                  | UA       | Expert proposed concept; Missing evidence in early PD                         | X                | x                | -                    | -                 | -        |
| <b>EXECUTIVE FUNCTION</b>         |          | Concept category; Unclear how concept is being measured                       | B                | 4                | 3%                   | 24%               | -        |
| Decreased mental flexibility      | UA       | Expert proposed concept; Missing evidence in early PD                         | X                | x                | -                    | -                 | -        |
| impaired ability to multitask     | UA       | Limited evidence; No disconfirming evidence                                   | C                | x                | 3%                   | 14%               | -        |
| <b>LANGUAGE</b>                   |          | Concept category aligning with state of science                               |                  |                  |                      |                   |          |
| Difficulty word finding           | Minor    | One large Tier 1 study found no evidence of bothersomeness at early stage     | A -              | x                | 17%                  | 42%               | [19-65%] |
| <b>VISUOSPATIAL</b>               |          | Concept category encompassing different visuospatial abilities                |                  |                  |                      |                   |          |
| Impaired depth perception         | UA       | Limited evidence; One Tier 1 study disconfirming presence in early PD <3YSD   | D -              | 4                | 3%                   | 25%               | -        |
| Difficulty finding way            | UA       | Limited evidence; no disconfirming evidence                                   | C                | x                | 4%                   | 10%               | -        |
| <b>ATTENTION &amp; PROCESSING</b> |          | Concept category                                                              |                  |                  |                      |                   |          |
| Impaired attention                | -        | No disconfirming evidence                                                     | B                | x                | 11%                  | 25%               | [24-25%] |
| Impaired concentration            | -        | No disconfirming evidence                                                     | A +              | 4                | 11%                  | 28%               | [14-63%] |
| Slower thinking                   | -        | No disconfirming evidence                                                     | B                | x                | 12%                  | 42%               | [30-53%] |
| Impaired mental alertness (fog)   | -        | No disconfirming evidence                                                     | B                | x                | 5%                   | 24%               | [8-40%]  |
| <b>DIAGNOSTIC CLASSIFICATION</b>  |          |                                                                               |                  |                  |                      |                   |          |
| Mild cognitive impairment         | Moderate | No disconfirming evidence, unclear if clinical classification or self-report  | C                | 3                | -                    | 30%               | [25-35%] |
| Dementia                          | Severe   | No evidence supporting presence in PD <3YSD; Disconfirming evidence in Tier 2 | X                | x -              | -                    | -                 | -        |

**Notes.** PD= Parkinson's disease; UA=Unable to assess due to limited data; YSD=Years since diagnosis of Parkinson's disease; **Tier 1 Grade** A+=100% (Green), A=75-99% (Green), B=50-74% (Yellow), C=25-49% (Orange), D=1-24% (Gray), X=No studies supporting presence in early PD (Black); **Tier 2 & 3 Level** 1=75-100% (Green), 2=50-74% (Yellow), 3=25-49% (Orange), 4=1-24% (Gray), x=No Tier 2 or 3 studies supporting presence in early PD (Black). Minus sign "-" in Grade or Level indicates presence of disconfirming evidence. Color coding is used for visual identification of concepts with greater supporting evidence in Grade and Level. For bothersomeness and prevalence, darker colors indicate higher average frequency in studies reporting.
