# Supplementary material for: A consensus conceptual model of meaningful symptoms and functional impacts in early Parkinson’s Disease
Source: Research Square preprint supplement (doi:10.21203/rs.3.rs-4377805/v1), 2024-07-03
Supplement: Supplementary file 8 [file 6ea7b84ebab6ed8e36d46b24.pdf]

# SENSORY DOMAIN (SYMPTOMS)

| Category/Concept                  |          | Coherence in Measurement & Classification                                           |                 | Adequacy of Data    |                      | Relevance of Concept |          |  |
|-----------------------------------|----------|-------------------------------------------------------------------------------------|-----------------|---------------------|----------------------|----------------------|----------|--|
|                                   | Concerns | Explanation                                                                         | Tier 1<br>Grade | Tier 2 & 3<br>Level | Bothersome<br>mean % | Prevalence<br>mean % | [Range]  |  |
| <b>FIVE SENSES</b>                |          | Proposed concept category                                                           |                 |                     |                      |                      |          |  |
| Vision                            | Moderate | Ambiguity in what is being measured                                                 | B               | x                   | 1%                   | 9%                   | [5-11%]  |  |
| Light sensitivity                 | UA       | Very limited data                                                                   | X               | 4                   | -                    | 21%                  | [2-27%]  |  |
| Double vision                     | UA       | Limited data; One Tier 1 study disconfirming presence in early PD <3YSD             | D -             | 4                   | -                    | 5%                   | [3-7%]   |  |
| Dry eyes                          | UA       | Very limited data                                                                   | D               | x                   | -                    | 3%                   | -        |  |
| Altered taste                     | UA       | Limited data                                                                        | D               | 4                   | 1%                   | 25%                  | -        |  |
| Altered smell                     | -        | Strong evidence all Tiers                                                           | A               | 3                   | 2%                   | 29%                  | [16-50%] |  |
| Impaired hearing                  | UA       | Limited data                                                                        | D               | x                   | -                    | 5%                   | -        |  |
| Impaired sensation                | Moderate | Inconsistent use in terminology for touch subconcepts                               | B               | x                   | 2%                   | 16%                  | [1-29%]  |  |
| Impaired sensation in hands/feet  | Moderate | Peripheral neuropathy (diagnosis) used interchangeably with numbness                | D               | 4                   | -                    | 27%                  | [15-38%] |  |
| Impaired vibratory sense          | Moderate | Vibratory sense colloquially confounded with tremor                                 | X               | 4                   | -                    | 55%                  | -        |  |
| Numbness                          | Moderate | Peripheral neuropathy (diagnosis) used interchangeably with numbness                | C               | x                   | 3%                   | 15%                  |          |  |
| Impaired temperature sensation    | Severe   | No evidence in early PD <3YSD; One Tier 1 study disconfirming; Inconsistent terms   | X -             | x                   | 3%                   | -                    | -        |  |
| Tingling                          | Moderate | Often reported as merged concept numbness/tingling                                  | C               | x                   | -                    | 13%                  | [11-15%] |  |
| <b>OTHER SENSATIONS</b>           |          | Proposed concept category                                                           |                 |                     |                      |                      |          |  |
| Pain (general)                    | Minor    | Non-specific - unclear what "pain" encompasses                                      | A +             | 3                   | 28%                  | 38%                  | [8-59%]  |  |
| Headaches                         | UA       | Limited data                                                                        | D               | x                   | 1%                   | -                    | -        |  |
| Fatigue/lack of energy            | Minor    | Often reported as tired/fatigued; one Tier 3 study disconfirming                    | A +             | 3 -                 | 28%                  | 50%                  | [20-76%] |  |
| Physical fatigue                  | -        | No disconfirming evidence                                                           | C               | x                   | 33%                  | 35%                  | [33-35%] |  |
| Mental fatigue                    | -        | No disconfirming evidence                                                           | B               | x                   | 1%                   | 8%                   | [1-8%]   |  |
| Breathlessness (dyspnea)          | Moderate | No evidence supporting presence in early PD <3yrs; Disconfirming evidence in Tier 1 | X -             | x                   | -                    | -                    | -        |  |
| Muscle weakness                   | -        | No disconfirming evidence                                                           | B               | x                   | 4%                   | 20%                  | [15-27%] |  |
| Heaviness                         | UA       | Very limited data                                                                   | D               | x                   | -                    | 5%                   | -        |  |
| Impaired body temperature control | Severe   | Confused with thermoregulation (autonomic); One Tier 1 study disconfirming          | C -             | 4                   | 2%                   | 25%                  | [3-57%]  |  |
| Heat intolerance                  | UA       | No Tier 1 evidence; very limited data                                               | X               | 4                   | -                    | 19%                  | -        |  |
| Cold intolerance                  | UA       | No Tier 1 evidence; very limited data                                               | X               | 4                   | -                    | 27%                  | -        |  |

**Notes.** PD=Parkinson's disease; UA=Unable to assess due to limited data; YSD=Years since diagnosis of Parkinson's disease; **Tier 1 Grade** A+=100% (Green), A=75-99% (Green), B=50-74% (Yellow), C=25-49% (Orange), D=1-24% (Gray), X=No studies supporting presence in early PD (Black); **Tier 2 & 3 Level** 1=75-100% (Green), 2=50-74% (Yellow), 3=25-49% (Orange), 4=1-24% (Gray), x=No Tier 2 or 3 studies supporting presence in early PD (Black). Minus sign "-" in Grade or Level indicates presence of disconfirming evidence. Color coding is used for visual identification of concepts with greater supporting evidence in Grade and Level. For bothersomeness and prevalence, darker colors indicate higher average frequency in studies reporting.
