# Supplementary material for: A consensus conceptual model of meaningful symptoms and functional impacts in early Parkinson’s Disease
Source: Research Square preprint supplement (doi:10.21203/rs.3.rs-4377805/v1), 2024-07-03
Supplement: Supplementary file 10 [file 7fbd9da2240b7f51945e27bd.pdf]

# PSYCHIATRIC DOMAIN (SYMPTOMS)

| Category/Concept                    |          | Coherence in Measurement & Classification                                      |              | Adequacy of Data |                   | Relevance of Concept |          |
|-------------------------------------|----------|--------------------------------------------------------------------------------|--------------|------------------|-------------------|----------------------|----------|
|                                     | Concerns | Explanation                                                                    | Tier 1 Grade | Tier 2 & 3 Level | Bothersome mean % | Prevalence mean %    | [Range]  |
| <b>MOOD &amp; AFFECT</b>            |          | Concept category; No disconfirming evidence                                    | <b>B</b>     | <b>4</b>         | <b>25%</b>        | <b>47%</b>           | [35-59%] |
| Apathy                              | Minor    | One study Tier 3 disconfirming presence in early PD <3YSD                      | <b>A</b>     | <b>3 -</b>       | <b>5%</b>         | <b>23%</b>           | [5-58%]  |
| Loss of interest                    | Moderate | Appears to overlap with concept of apathy                                      | <b>C</b>     | <b>4</b>         | -                 | <b>24%</b>           | [14-35%] |
| Decreased goal directed behavior    | UA       | Expert proposed concept; missing evidence in early PD                          | <b>X</b>     | <b>x</b>         | -                 | -                    | -        |
| Anxious mood                        | Minor    | One study Tier 3 disconfirming elevated presence in early PD <3YSD             | <b>A +</b>   | <b>3 -</b>       | <b>21%</b>        | <b>45%</b>           | [12-74%] |
| Social phobia                       | UA       | No evidence in early PD <3YSD                                                  | <b>X</b>     | <b>x</b>         | -                 | -                    | -        |
| Panic                               | UA       | Minimal evidence in early PD <3YSD                                             | <b>D</b>     | <b>x</b>         | -                 | <b>14%</b>           | -        |
| Excessive worrying                  | UA       | Expert proposed concept; missing evidence in early PD                          |              |                  |                   |                      |          |
| Depressed mood                      | Moderate | Unclear if clinical diagnosis or symptoms of depressed mood                    | <b>A +</b>   | <b>3</b>         | <b>8%</b>         | <b>34%</b>           | [10-59%] |
| Low or flat mood                    | UA       | Patient panel strongly advocates to retain concept as distinct from depression | <b>C</b>     | <b>4</b>         | -                 | <b>27%</b>           | [19-38%] |
| Feelings of sadness                 | Moderate | Potential overlap with depression/depressed mood; Not reported in PD <3YSD     | <b>X</b>     | <b>x</b>         | -                 | -                    | -        |
| Loss of pleasure                    | UA       | Minimal evidence in early PD <3YSD                                             | <b>D</b>     | <b>x</b>         | -                 | <b>30%</b>           | -        |
| Negative feelings/emotions          | UA       | Patient panel strongly advocates to retain concept as distinct from depression | <b>C</b>     | <b>x</b>         | <b>27%</b>        | <b>30%</b>           | -        |
| Suicidal ideation/thoughts of death | UA       | Limited evidence in early PD <3YSD                                             | <b>C</b>     | <b>x</b>         | <b>1%</b>         | <b>3%</b>            | -        |
| Emotional lability                  | New      | Category suggested by patient panel                                            |              |                  |                   |                      |          |
| Pseudobulbar affect                 | UA       | No supporting evidence in early PD; One study disconfirming in Tier 1          | <b>X -</b>   | <b>x</b>         |                   |                      |          |
| Irritability                        | UA       | Patient panel advocates for inclusion as a symptom                             | <b>D</b>     | <b>4</b>         | <b>1%</b>         | <b>14%</b>           | [1-18%]  |
| Euphoria                            | Minor    | Limited evidence; One Tier 3 study disconfirming presence in early PD <3YSD    | <b>X</b>     | <b>x -</b>       |                   |                      |          |
| Agitation                           | UA       | Minimal evidence in early PD <3YSD                                             | <b>X</b>     | <b>4</b>         | -                 | <b>13%</b>           | [12-13%] |
| <b>BEHAVIORS</b>                    |          | Expert proposed concept category                                               |              |                  |                   |                      |          |
| Impulsive-compulsive behaviors      | UA       | One Tier 1 study disconfirming presence in PD <3YSD; Very limited evidence     | <b>X -</b>   | <b>4</b>         | -                 | <b>10%</b>           | -        |
| Medication use                      | UA       | Very limited evidence in early PD <3YSD                                        | <b>X</b>     | <b>4</b>         | -                 | <b>2%</b>            | -        |
| Buying                              | UA       | Very limited evidence in early PD <3YSD                                        | <b>X</b>     | <b>4</b>         | -                 | <b>4%</b>            | -        |
| Eating                              | UA       | Very limited evidence in early PD <3YSD                                        | <b>X</b>     | <b>4</b>         | -                 | <b>5%</b>            | -        |
| Sexual                              | UA       | Very limited evidence in early PD <3YSD                                        | <b>X</b>     | <b>4</b>         | -                 | <b>5%</b>            | -        |
| Punding                             | UA       | Very limited evidence in early PD <3YSD                                        | <b>X</b>     | <b>4</b>         | -                 | <b>5%</b>            | -        |
| Gambling                            | UA       | Very limited evidence in early PD <3YSD                                        | <b>X</b>     | <b>4</b>         | -                 | <b>1%</b>            | -        |
| Walkabout                           | UA       | Very limited evidence in early PD <3YSD                                        | <b>X</b>     | <b>4</b>         | -                 | <b>1%</b>            | -        |

## PSYCHIATRIC DOMAIN (SYMPTOMS)

|                                     |          |                                                                    |   |   |    |     |   |
|-------------------------------------|----------|--------------------------------------------------------------------|---|---|----|-----|---|
| <i>Hobbyism</i>                     | UA       | Very limited evidence in early PD <3YSD                            | X | 4 | -  | 11% | - |
| <i>Subsyndromal ICD</i>             | UA       | Diagnostic classification: Minimal evidence in early PD <3YSD      | X | 4 | -  | 10% | - |
| <i>ICD</i>                          | UA       | Diagnostic classification: Minimal evidence in early PD <3YSD      | X | 4 | -  | 25% | - |
| <b>PSYCHOSIS</b>                    |          |                                                                    |   |   |    |     |   |
|                                     |          | Expert proposed concept category                                   |   |   |    |     |   |
| Psychosis                           | UA       | Minimal evidence in early PD <3YSD                                 | X | x | -  | -   | - |
| <i>Minor psychosis</i>              | UA       | Expert proposed concept; missing evidence in early PD              | X | x | -  | -   | - |
| <i>Delusions</i>                    | UA       | Minimal evidence in early PD <3YSD                                 | X | 4 | -  | 2%  | - |
| <i>Hallucinations</i>               | UA       | Minimal evidence in early PD <3YSD                                 | D | 4 | 1% | 4%  | - |
| <b>PERSONALITY CHANGES</b>          |          |                                                                    |   |   |    |     |   |
|                                     |          | Expert proposed concept category                                   |   |   |    |     |   |
| Personality changes                 | UA       | Very limited evidence in early PD <3YSD                            | D | 4 | 1% | -   | - |
| <i>Excessive persistence</i>        | Moderate | Concern for overlap with perseveration; No evidence early PD <3YSD | X | x | -  | -   | - |
| <i>Reward seeking behavior</i>      | UA       | No evidence in early PD <3YSD                                      | X | x | -  | -   | - |
| <i>Disinhibitions</i>               | UA       | Minimal evidence in early PD <3YSD                                 | X | 4 | -  | 2%  | - |
| <i>Neuroticism</i>                  | UA       | No evidence in early PD <3YSD                                      | X | x | -  | -   | - |
| <i>Impaired emotion recognition</i> | UA       | No evidence in early PD <3YSD                                      | X | x | -  | -   | - |
| <i>Low novelty seeking</i>          | UA       | No evidence in early PD <3YSD                                      | X | x | -  | -   | - |

**Notes.** PD= Parkinson's disease; UA=Unable to assess due to limited data; YSD=Years since diagnosis of Parkinson's disease; **Tier 1 Grade** A+=100% (Green), A=75-99% (Green), B=50-74% (Yellow), C=25-49% (Orange), D=1-24% (Gray), X=No studies supporting presence in early PD (Black); **Tier 2 & 3 Level** 1=75-100% (Green), 2=50-74% (Yellow), 3=25-49% (Orange), 4=1-24% (Gray), x=No Tier 2 or 3 studies supporting presence in early PD (Black). Minus sign "-" in Grade or Level indicates presence of disconfirming evidence. Color coding is used for visual identification of concepts with greater supporting evidence in Grade and Level. For bothersomeness and prevalence, darker colors indicate higher average frequency in studies reporting.
