# Supplementary material for: A consensus conceptual model of meaningful symptoms and functional impacts in early Parkinson’s Disease
Source: Research Square preprint supplement (doi:10.21203/rs.3.rs-4377805/v1), 2024-07-03
Supplement: Supplementary file 11 [file 8adb85fa6d83beed98a21c4b.pdf]

# MOVEMENT DOMAIN (SYMPTOMS)

| Category/Concept                      |          | Coherence in Measurement & Classification                                    |                 | Adequacy of Data    |                      | Relevance of Concept |           |  |
|---------------------------------------|----------|------------------------------------------------------------------------------|-----------------|---------------------|----------------------|----------------------|-----------|--|
|                                       | Concerns | Explanation                                                                  | Tier 1<br>Grade | Tier 2 & 3<br>Level | Bothersome<br>mean % | Prevalence<br>mean % | [Range]   |  |
| <b>SLOW MOVEMENT</b>                  |          | Concept category                                                             |                 |                     |                      |                      |           |  |
| Slowed movements                      | -        | No concerns; One Tier 3 study disconfirming presence in early PD             | A +             | 4 -                 | 29%                  | 54%                  | [5-83%]   |  |
| <b>LOSS OF COORDINATION</b>           |          | Concept category                                                             |                 |                     |                      |                      |           |  |
| Loss of coordination                  | Moderate | Variably reported and may confound fine motor with gross motor               | B               | x                   | 10%                  | 14%                  | [5-23%]   |  |
| <b>FINE MOTOR</b>                     |          | Concept category                                                             |                 |                     |                      |                      |           |  |
| Altered fine motor dexterity          | -        | No concerns; No disconfirming evidence                                       | A               | 4                   | 35%                  | 85%                  | [71-95%]  |  |
| <b>STIFFNESS</b>                      |          | Concept category                                                             |                 |                     |                      |                      |           |  |
| Stiffness/Rigidity                    | Minor    | Variable terminology (stiff, tight, rigid); No disconfirming evidence        | A +             | 4                   | 24%                  | 62%                  | [50-69%]  |  |
| Decreased range of motion             | Minor    | Inconsistent classification as symptom vs. impact; Limited evidence          | D               | x                   | 13%                  | 17%                  | [5-28%]   |  |
| Decreased facial expression           | -        | No concerns; No disconfirming evidence                                       | A +             | x                   | 3%                   | 18%                  | [13-27%]  |  |
| Impaired eye movements                | Moderate | Encompasses blinking and pupulomotor control; Definitions needed             | D               | 4                   | -                    | 19%                  | -         |  |
| <b>WALKING, BALANCE &amp; POSTURE</b> | Minor    | Concept category - composite concept blending walking and balance            | B               | 4                   | 21%                  | 57%                  | [30-75%]  |  |
| Impaired balance                      | -        | No concerns; No disconfirming evidence                                       | A +             | 4                   | 20%                  | 41%                  | [7-66%]   |  |
| Gait changes                          | Minor    | Variable approaches to measurement and multiple subconcepts limits synthesis | A +             | 4                   | 32%                  | 63%                  | [40-86%]  |  |
| Shuffling                             | UA       | Limited evidence in early PD <3 years                                        | D               | x                   | -                    | 11%                  | -         |  |
| Dragging feet                         | UA       | Limited evidence in early PD <3 years                                        | D               | x                   | -                    | 24%                  | -         |  |
| Altered stride length                 | UA       | Limited evidence in early PD <3 years                                        | D               | x                   | -                    | 3%                   | -         |  |
| Altered stance                        | UA       | No evidence in early PD <3YSD                                                | X               | x                   | -                    | -                    | -         |  |
| Altered turning                       | UA       | Limited evidence in early PD <3YSD                                           | D               | x                   | -                    | 5%                   | -         |  |
| Altered double support time           | UA       | No evidence in early PD <3YSD                                                | X               | x                   | -                    | -                    | -         |  |
| Staggering                            | UA       | No evidence in early PD <3YSD                                                | X               | x                   | -                    | -                    | -         |  |
| Freezing                              | -        | No concerns; No disconfirming evidence                                       | B               | 4                   | 3%                   | 6%                   | [4-16%]   |  |
| Altered gait velocity                 | UA       | No evidence in early PD <3YSD                                                | X               | x                   | -                    | -                    | -         |  |
| Altered arm Swing                     | -        | No concerns; No disconfirming evidence                                       | B               | x                   | 5%                   | 55%                  | [38-71%]  |  |
| Postural changes                      | -        | No concerns; No disconfirming evidence                                       | A +             | x                   | 4%                   | 15%                  | -         |  |
| <b>TREMOR</b>                         |          | Concept category                                                             |                 |                     |                      |                      |           |  |
| Tremor                                | -        | No concerns; No disconfirming evidence                                       | A +             | 4                   | 57%                  | 85%                  | [42-100%] |  |
| Sense of internal tremor              | -        | Sometimes confounded with "vibratory" sense                                  | B               | 2                   | 1%                   | 9%                   | [8-9%]    |  |

## MOVEMENT DOMAIN (SYMPTOMS)

| OTHER INVOLUNTARY MOVEMENT |          | Concept category                                                             |     |     |    |     |          |
|----------------------------|----------|------------------------------------------------------------------------------|-----|-----|----|-----|----------|
| Cramping/spasm             | -        | Variable terminology (cramping, spasms, dystonia); No disconfirming evidence | A   | x   | 9% | 30% | [20-41%] |
| Restless legs              | Minor    | Inconsistent classification as MS vs. NMS; One Tier 1 source disconfirming   | B - | x   | 1% | 13% | [0-38%]  |
| Twitching                  | Moderate | Inconsistent terminology (twitching, jerking); no disconfirming evidence     | D   | x   | -  | 30% | -        |
| Dyskinesias                | Severe   | Inconsistent and disconfirming evidence all Tiers                            | B - | 4 - | 2% | 11% | [0-2%]   |

**Notes.** PD=Parkinson's disease; UA=Unable to assess due to limited data; YSD=Years since diagnosis of Parkinson's disease; **Tier 1 Grade** A+=100% (Green), A=75-99% (Green), B=50-74% (Yellow), C=25-49% (Orange), D=1-24% (Gray), X=No studies supporting presence in early PD (Black); **Tier 2 & 3 Level** 1=75-100% (Green), 2=50-74% (Yellow), 3=25-49% (Orange), 4=1-24% (Gray), x=No Tier 2 or 3 studies supporting presence in early PD (Black). Minus sign "-" in Grade or Level indicates presence of disconfirming evidence. Color coding is used for visual identification of concepts with greater supporting evidence in Grade and Level. For bothersomeness and prevalence, darker colors indicate higher average frequency in studies reporting.
