# Supplementary material for: A consensus conceptual model of meaningful symptoms and functional impacts in early Parkinson’s Disease
Source: Research Square preprint supplement (doi:10.21203/rs.3.rs-4377805/v1), 2024-07-03
Supplement: Supplementary file 12 [file af7da29e59c2cfa3605c2b13.pdf]

# PHYSICAL FUNCTIONING DOMAIN (IMPACTS)

| Category/Concept              | Coherence in Measurement & Classification |                                                                               | Adequacy of Data |                  | Relevance of Concept |                   |          |
|-------------------------------|-------------------------------------------|-------------------------------------------------------------------------------|------------------|------------------|----------------------|-------------------|----------|
|                               | Concerns                                  | Explanation                                                                   | Tier 1 Grade     | Tier 2 & 3 Level | Bothersome mean %    | Prevalence mean % | [Range]  |
| MOBILITY                      |                                           | Proposed concept category                                                     | A                | 4                | 31%                  | 70%               | [51-88%] |
| Getting out of bed/chair/car  | -                                         | No issues                                                                     | A                | 4                | 3%                   | 21%               | [13-34%] |
| Turning in bed                | Moderate                                  | One Tier 1 study disconfirming presence in early PD <3YSD                     | C -              | 4                | -                    | 28%               | [13-58%] |
| Standing                      | Moderate                                  | Encompasses getting to standing position and maintaining standing             | B                | x                | 2%                   | 21%               | [16-26%] |
| Kneeling/bending              | Moderate                                  | Composite concept encompassing two activities                                 | D                | x                | -                    | 3%                | -        |
| Going up or down stairs       | -                                         | No issues                                                                     | B                | x                | 1%                   | 17%               | [5-25%]  |
| Lifting/holding/carrying      | Moderate                                  | Composite concept encompassing several activities                             | B                | x                | 1%                   | 23                | [9-42%]  |
| Gripping and opening          | Moderate                                  | Composite concept; One Tier 1 study disconfirming presence in early PD <3YSD  | B -              | x                | -                    | 25%               | [8=40%]  |
| Handwriting                   | -                                         | No issues                                                                     | A                | 4                | 5%                   | 69%               | [51-95%] |
| Using a computer              | Moderate                                  | Composite: Includes keyboard and mouse/trackpad use                           | B                | x                | 3%                   | 52%               | [34-69%] |
| Using smartphone/tablet       | -                                         | No issues                                                                     | B                | x                | 1%                   | 12%               | [9-14%]  |
| Exercise/sports               | Minor                                     | Includes range of activities                                                  | B                | 4                | 23%                  | 61%               | 50-66%   |
| PHYSICAL COMFORT              |                                           | Proposed concept category                                                     | C                | x                | 13%                  | 38                | -        |
| Feeling unwell                | -                                         | Limited evidence                                                              | D                | x                | 2%                   | -                 | -        |
| Difficulty relaxing           | -                                         | Limited evidence                                                              | D                | x                | 2%                   | -                 | -        |
| EFFORT OF DAILY LIVING        |                                           | Patient panel proposed category to capture increased work of daily living     | D                | x                | 29%                  | -                 | -        |
| Functional slowness           | Minor                                     | Variable terminology including "Longer to do things"                          | B                | x                | 16%                  | 28%               | [5-51%]  |
| Increased effort to do things | UA                                        | Component of concept category effort of living; limited evidence              | C                | x                | 28%                  | 41%               | -        |
| Having to plan around PD      | UA                                        | Limited evidence; One Tier 1 study disconfirming presence in early PD <3YSD   | C -              | x                | -                    | 15%               | [11-19%] |
| SELF-CARE                     |                                           | Proposed concept category                                                     |                  |                  |                      |                   |          |
| Dressing                      | Minor                                     | Patient panel recommendation to identify specific aspects of dressing         | B                | 4                | 2%                   | 30%               | [10-41%] |
| Personal hygiene/self-care    | Minor                                     | Encompasses range of specific experiences                                     | B                | 4                | 3%                   | 24%               | [5-38%]  |
| Eating tasks                  | Minor                                     | Encompasses range of specific experiences                                     | B                | 4                | 3%                   | 48%               | [28-71%] |
| SAFETY                        |                                           | Proposed concept category                                                     |                  |                  |                      |                   |          |
| Accidental self-injury        | UA                                        | Limited evidence                                                              | C                | x                | 5%                   | 3%                | -        |
| Tripping & Falling            | Moderate                                  | Double barrelled; Two Tier 2 studies disconfirming presence in early PD <3YSD | A                | 4 -              | 5%                   | 18%               | [10-27%] |
| Weight change                 | Moderate                                  | Unclear best categorical or domain fit for concept                            | C                | 4                | -                    | 8%                | [4-15%]  |

**Notes.** PD= Parkinson's disease; UA=Unable to assess due to limited data; YSD=Years since diagnosis of Parkinson's disease; **Tier 1 Grade** A+=100% (Green), A=75-99% (Green), B=50-74% (Yellow), C=25-49% (Orange), D=1-24% (Gray), X=No studies supporting presence in early PD (Black); **Tier 2 & 3 Level** 1=75-100% (Green), 2=50-74% (Yellow), 3=25-49% (Orange), 4=1-24% (Gray), x=No Tier 2 or 3 studies supporting presence in early PD (Black). Minus sign "-" in Grade or Level indicates presence of disconfirming evidence. Color coding is used for visual identification of concepts with greater supporting evidence in Grade and Level. For bothersomeness and prevalence, darker colors indicate higher average frequency in studies reporting.
