# Supplementary material for: A consensus conceptual model of meaningful symptoms and functional impacts in early Parkinson’s Disease
Source: Research Square preprint supplement (doi:10.21203/rs.3.rs-4377805/v1), 2024-07-03
Supplement: Supplementary file 13 [file b6fbf42b0a5ef2dcb241abb4.pdf]

# URINARY DOMAIN (SYMPTOMS)

| Category/Concept     | Coherence in Measurement & Classification |                                                                                 | Adequacy of Data |                  | Relevance of Concept |                   |                    |
|----------------------|-------------------------------------------|---------------------------------------------------------------------------------|------------------|------------------|----------------------|-------------------|--------------------|
|                      | Concerns                                  | Explanation                                                                     | Tier 1 Grade     | Tier 2 & 3 Level | Bothersome mean %    | Prevalence mean % | Prevalence [Range] |
| URINARY DYSFUNCTION  | Moderate                                  | Composite concept may include multiple experiences                              | A +              | 3                | 5%                   | 40%               | [17-97%]           |
| Urinary frequency    | Moderate                                  | Appears to be individually defined; Not clearly defined                         | D                | 4                | 13%                  | 56%               | [26-80%]           |
| Urinary urgency      | -                                         | Limited evidence; No disconfirming evidence                                     | D                | 4                | 2%                   | 23%               | [14-69%]           |
| Nocturia             | Moderate                                  | One Tier 3 study disconfirming presence in early PD <3 YSD; Not clearly defined | C                | 3 -              | 14%                  | 47%               | [17-87%]           |
| Incomplete voiding   | UA                                        | No evidence in early PD <3 YSD                                                  | X                | x                | -                    | 32%               | [17-40%]           |
| Urinary incontinence | -                                         | Limited evidence; No disconfirming evidence                                     | C                | 4                | 3%                   | 23%               | [2-35%]            |
| Urinary infections   | UA                                        | No evidence in early PD <3 YSD                                                  | X                | x                | -                    | -                 | -                  |
| Weak urine stream    | UA                                        | Limited evidence; No disconfirming evidence                                     | X                | 4                | -                    | 40%               | [39-41%]           |

**Notes.** PD= Parkinson's disease; UA=Unable to assess due to limited data; YSD=Years since diagnosis of Parkinson's disease; **Tier 1 Grade** A+=100% (Green), A=75-99% (Green), B=50-74% (Yellow), C=25-49% (Orange), D=1-24% (Gray), X=No studies supporting presence in early PD (Black); **Tier 2 & 3 Level** 1=75-100% (Green), 2=50-74% (Yellow), 3=25-49% (Orange), 4=1-24% (Gray), x=No Tier 2 or 3 studies supporting presence in early PD (Black). Minus sign "-" in Grade or Level indicates presence of disconfirming evidence. Color coding is used for visual identification of concepts with greater supporting evidence in Grade and Level. For bothersomeness and prevalence, darker colors indicate higher average frequency in studies reporting.
