# Supplementary material for: A consensus conceptual model of meaningful symptoms and functional impacts in early Parkinson’s Disease
Source: Research Square preprint supplement (doi:10.21203/rs.3.rs-4377805/v1), 2024-07-03
Supplement: Supplementary file 14 [file c742c8710b52a43f37a07ff7.pdf]

**Table 2. Operationalized criteria for assessment of quality of evidence – GRADE-CERQual**

| CERQual Criteria                  | Operationalized definition                                                                                                                                                                                                                                                                                                                                                                                                                                                                                                                                             | Approach to criteria                                                                                                                                                                                                                                                                                                                                                                                                                                                                                                                                                                                                                                                                                                                                                                        |                                                                                                                                                                                                                                                                                                                                                                                                                                                                                                                                                                                                                                                                                                                                                                                                                                                             |
|-----------------------------------|------------------------------------------------------------------------------------------------------------------------------------------------------------------------------------------------------------------------------------------------------------------------------------------------------------------------------------------------------------------------------------------------------------------------------------------------------------------------------------------------------------------------------------------------------------------------|---------------------------------------------------------------------------------------------------------------------------------------------------------------------------------------------------------------------------------------------------------------------------------------------------------------------------------------------------------------------------------------------------------------------------------------------------------------------------------------------------------------------------------------------------------------------------------------------------------------------------------------------------------------------------------------------------------------------------------------------------------------------------------------------|-------------------------------------------------------------------------------------------------------------------------------------------------------------------------------------------------------------------------------------------------------------------------------------------------------------------------------------------------------------------------------------------------------------------------------------------------------------------------------------------------------------------------------------------------------------------------------------------------------------------------------------------------------------------------------------------------------------------------------------------------------------------------------------------------------------------------------------------------------------|
| <b>Methodological limitations</b> | Methodological limitations in approaches to identifying symptoms and impacts that may limit what type of information was reported – e.g. use of validated measures that only collect specific data (restricted), vs. qualitative interviews allow for unrestricted reporting.                                                                                                                                                                                                                                                                                          | <p>Tiering system for weighted inclusion of sources by methodological adequacy:</p> <ul style="list-style-type: none"> <li>• Tier 1: Qualitative studies collecting unrestricted data directly from report of patients and family.</li> <li>• Tier 2: Quantitative studies measuring specific symptoms or impacts predominantly from the patient perspective.</li> <li>• Tier 3: Quantitative studies measure specific symptoms or impacts from the clinician or outside observer perspective.</li> </ul> <p>Highest priority is given to direct patient voice with unrestricted approach to exploring symptoms or impacts. Lower priority is given to Tier 2 and 3 sources due to methodology that resulted in restricted data collection.</p>                                             |                                                                                                                                                                                                                                                                                                                                                                                                                                                                                                                                                                                                                                                                                                                                                                                                                                                             |
| <b>Coherence</b>                  | Assessment of the agreement of the primary studies regarding the concepts of interest. Threats to coherence include: contradictory data, divergent classification, ambiguous or conflicting descriptions.                                                                                                                                                                                                                                                                                                                                                              | <ul style="list-style-type: none"> <li>• No concerns – consistent and coherent classification of COI across studies</li> <li>• Minor concerns – 80 – 94% coherence in classification</li> <li>• Moderate concerns – 50-74% coherence in classification</li> <li>• Severe concerns- &lt;50% coherence in classification</li> </ul> <p>No or minor concerns preferred.</p>                                                                                                                                                                                                                                                                                                                                                                                                                    |                                                                                                                                                                                                                                                                                                                                                                                                                                                                                                                                                                                                                                                                                                                                                                                                                                                             |
| <b>Adequacy</b>                   | <p>Adequacy is the richness and quantity of data supporting the measurable presence of a COI in the early PD population as seen in primary sources.</p> <p><i>Primarily:</i> Percentage of Tier 1 sources (direct patient voice) that reported the COI as being measurably present in an early PD population.</p> <p><i>Secondarily:</i> Percentage of Tiers 2 and 3 that reported the COI as being measurably present in an early PD population.</p> <p>Evidence from Tiers 2 and 3 alone is <i>insufficient proof</i> of adequacy if lacking evidence in Tier 1.</p> | <p><i>Primary classification of adequacy (Tier 1):</i></p> <ul style="list-style-type: none"> <li>• Grade A = Strong evidence in Tier 1</li> <li>• Grade B = Moderate evidence in Tier 1</li> <li>• Grade C = Limited evidence in Tier 1</li> <li>• Grade D = lacking evidence in Tier 1</li> <li>• Grade X = No evidence in Tier 1</li> </ul> <p><i>Secondary classification of adequacy (Tier 2 &amp; 3):</i></p> <ul style="list-style-type: none"> <li>• Level 1 = strong evidence in Tier 2 or 3</li> <li>• Level 2 = moderate evidence in Tier 2 or 3</li> <li>• Level 3 = limited evidence in Tier 2 or 3</li> <li>• Level 4 = very limited evidence in Tier 2 or 3</li> <li>• Level x = No evidence in Tier 2 or 3</li> </ul> <p>Grade A and B evidence preferred (ex. A1, A2).</p> | <p><i>Thresholds are based on the <u>percentage of studies</u> reporting the concept:</i></p> <ul style="list-style-type: none"> <li>• X/x = No studies reporting (Black)</li> <li>• 1-24% of studies = Very limited evidence (Gray)</li> <li>• 25-49% of studies = Limited evidence (Orange)</li> <li>• 50-74% of studies = Moderate evidence (Yellow)</li> <li>• ≥ 75% of studies = Strong evidence (Green)</li> </ul> <p>Color coding is used for easy visual identification of concepts with greater supporting evidence. Grade vs. Level is used to distinguish between Tier 1 vs. Tier 2 &amp; 3 evidence. Grade and Level do not indicate the prevalence or relative bothersomeness of a concept. Concepts with low grade or level may be understudied important concepts, particularly if any evidence for bothersomeness or higher prevalence.</p> |
| <b>Relevance</b>                  | Composite score indicating the extent to which evidence from the primary studies supports the concept as being actively <u>bothersome</u> to people with early PD, in addition to being commonly present in the population.                                                                                                                                                                                                                                                                                                                                            | <p><i>Bothersome rating:</i> Average frequency (%) at which concept is reported as bothersome in early PD among studies measuring frequency of the concept.</p> <p><i>Prevalence rating:</i> Estimate of presence of concept <i>in an early PD population</i> based on the average prevalence (% Range) reported in studies that the measured the construct.</p>                                                                                                                                                                                                                                                                                                                                                                                                                            |                                                                                                                                                                                                                                                                                                                                                                                                                                                                                                                                                                                                                                                                                                                                                                                                                                                             |
