# Supplementary material for: A consensus conceptual model of meaningful symptoms and functional impacts in early Parkinson’s Disease
Source: Research Square preprint supplement (doi:10.21203/rs.3.rs-4377805/v1), 2024-07-03

**CONCEPTUAL MODEL  
of SYMPTOMS & FUNCTIONAL IMPACTS  
in PARKINSON'S DISEASE  
(Concept Map)**

**0-3 years from diagnosis**

**SYMPTOMS**

**FUNCTIONAL  
IMPACTS**

**Domains**

**MOVEMENT**

**COGNITIVE**

**PSYCHIATRIC**

**SENSATION**

**SLEEP**

**SPEECH & VOICE**

**DIGESTIVE SYSTEM**

**URINARY**

**SEXUAL**

**AUTONOMIC  
NERVOUS SYSTEM**

**Domains**

**PHYSICAL FUNCTIONING**

**PSYCHOSOCIAL FUNCTIONING**

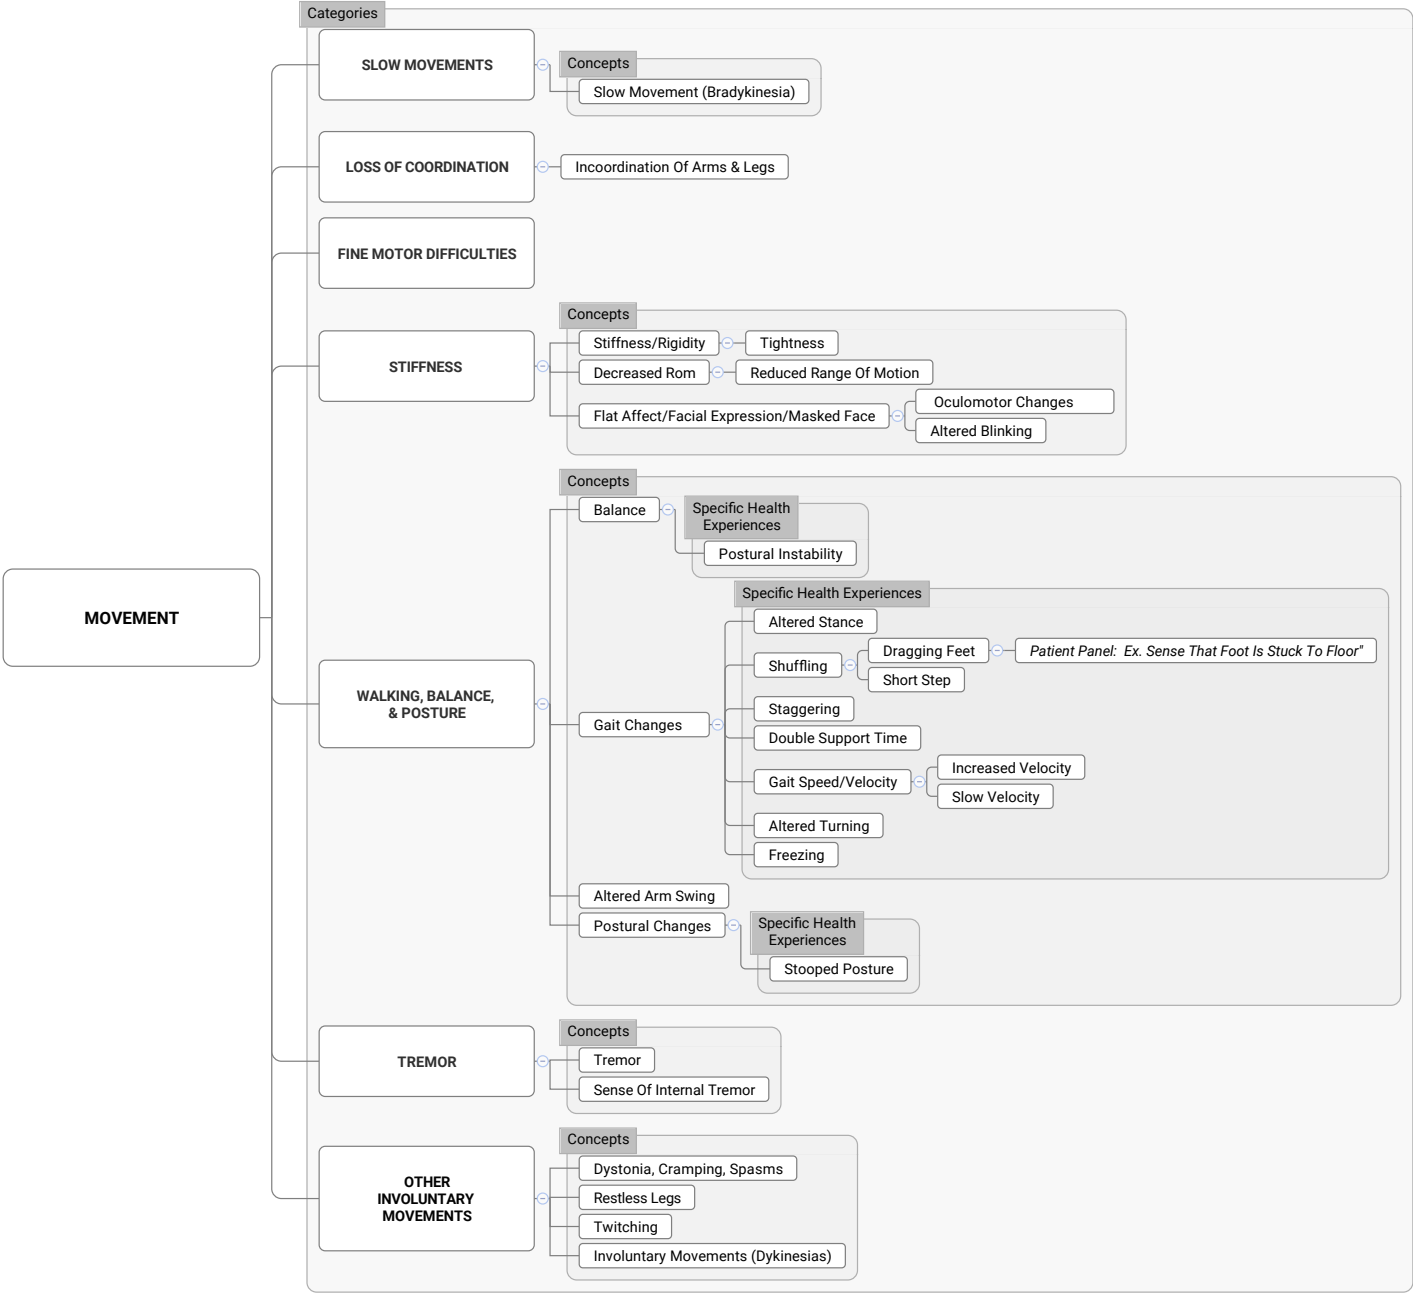

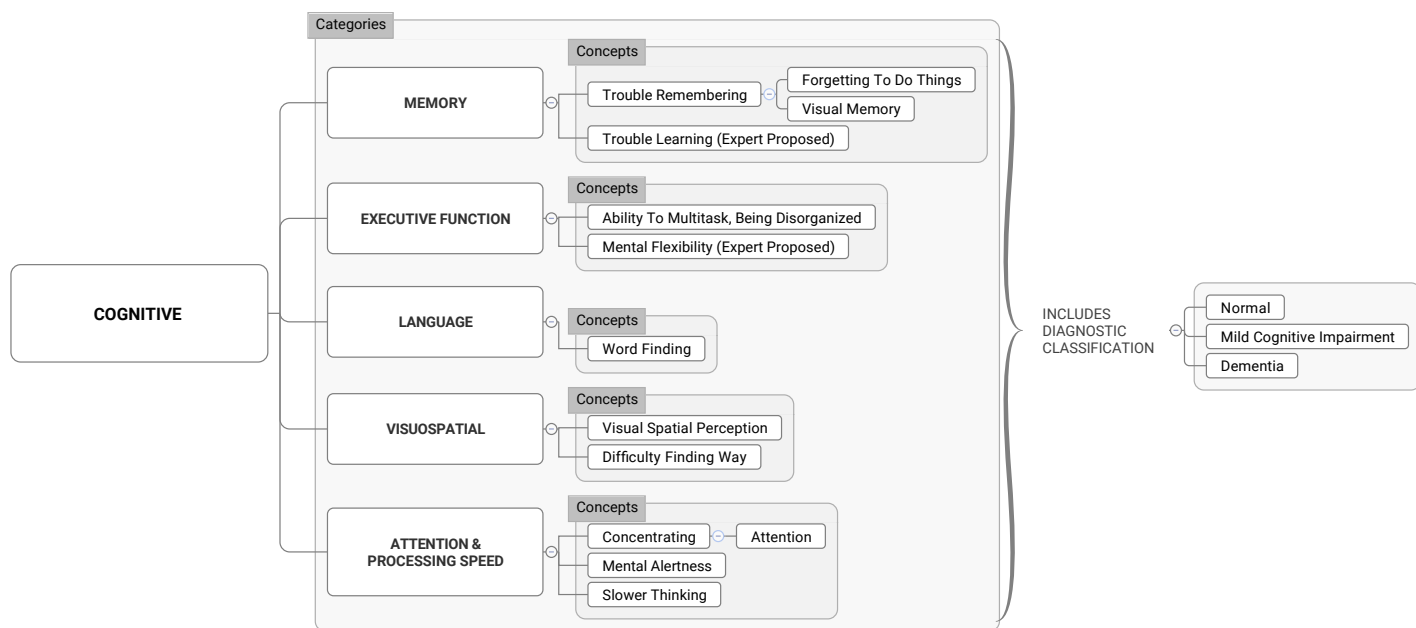

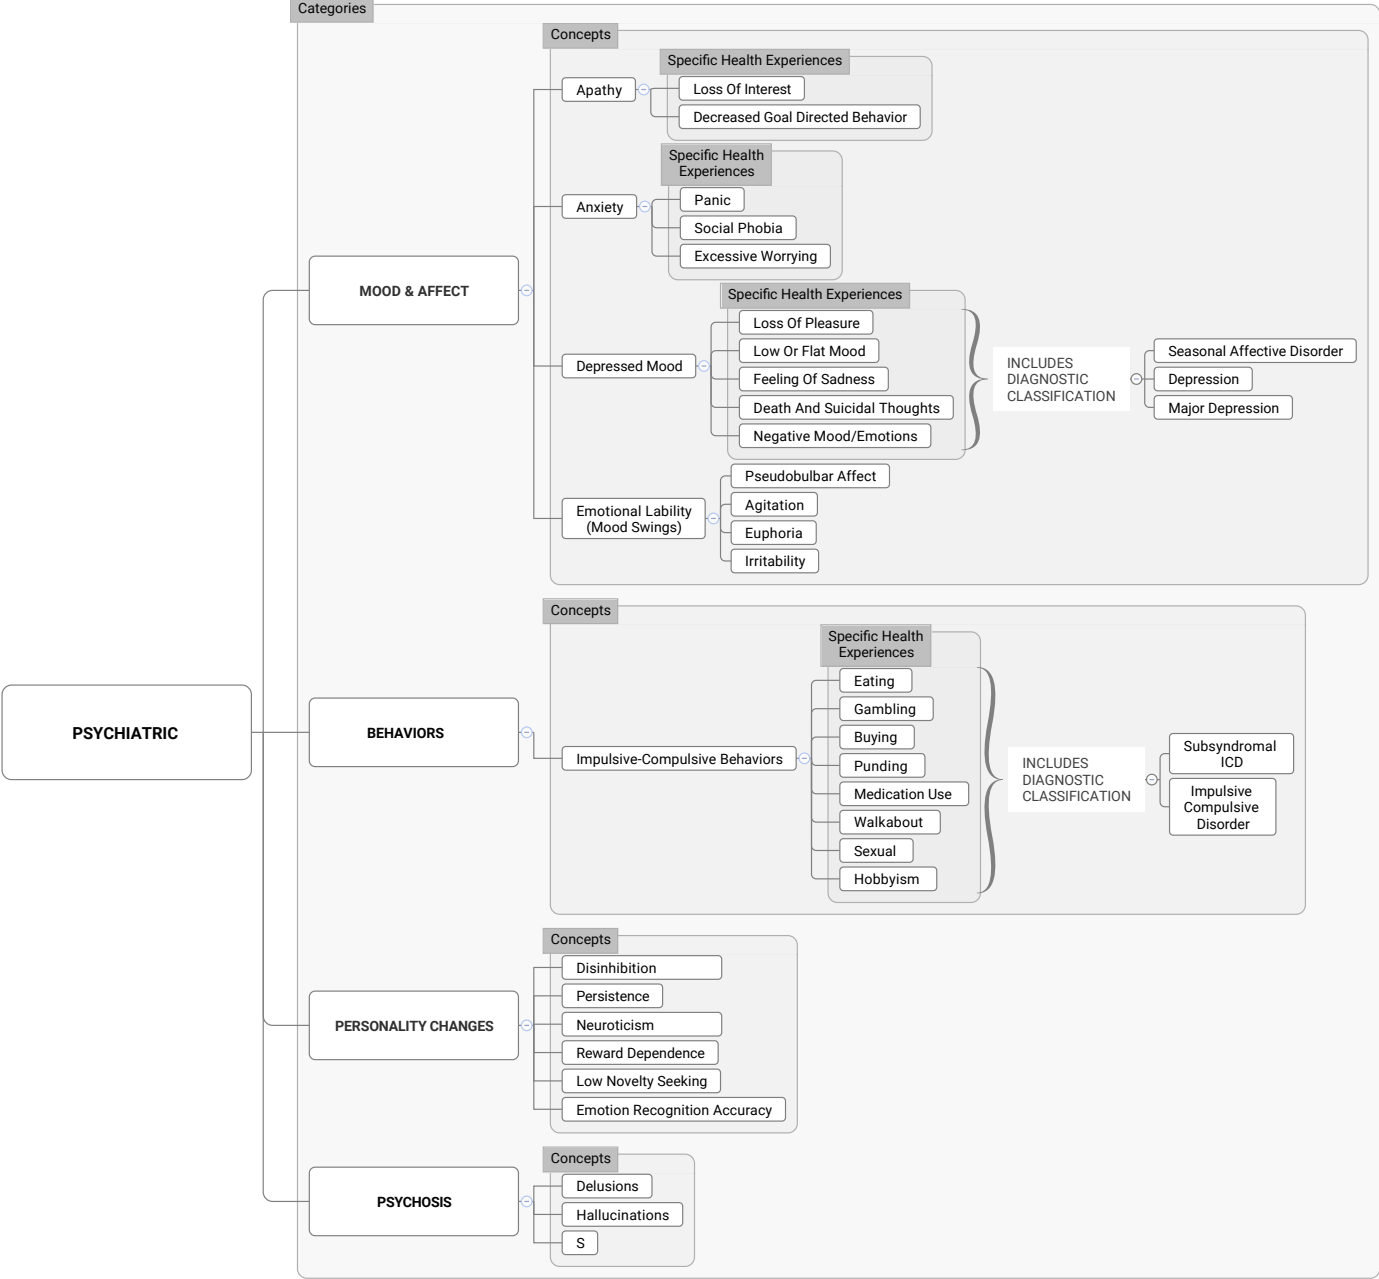

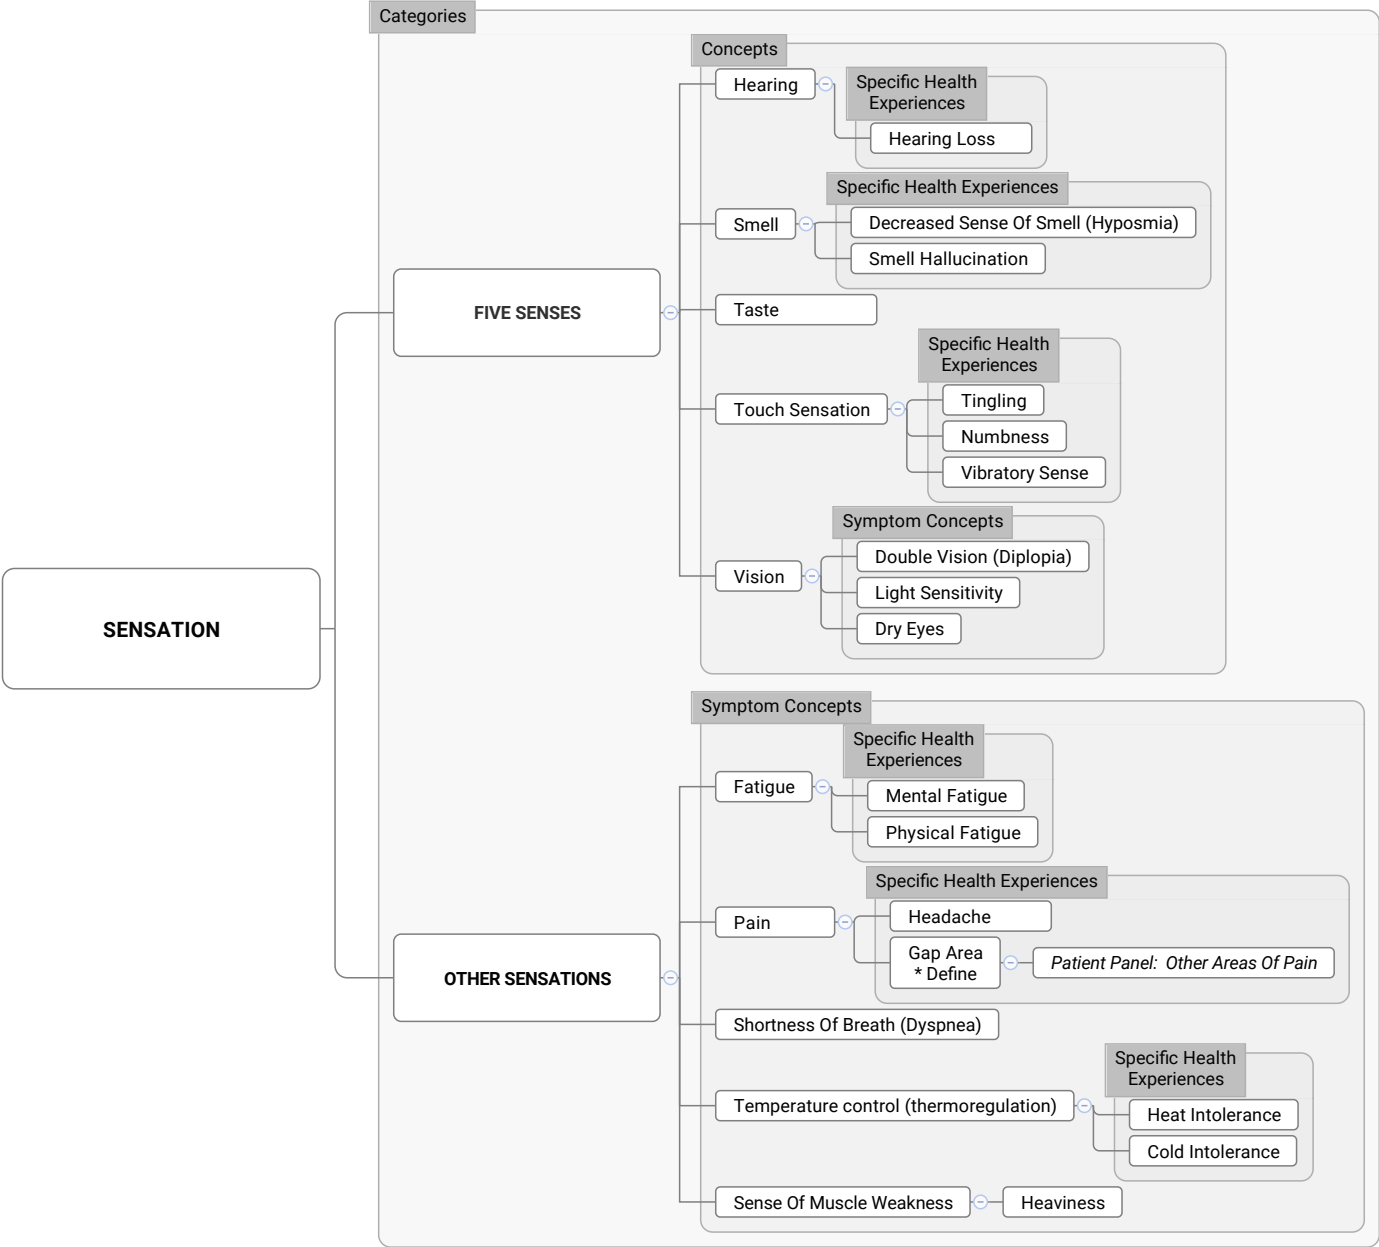

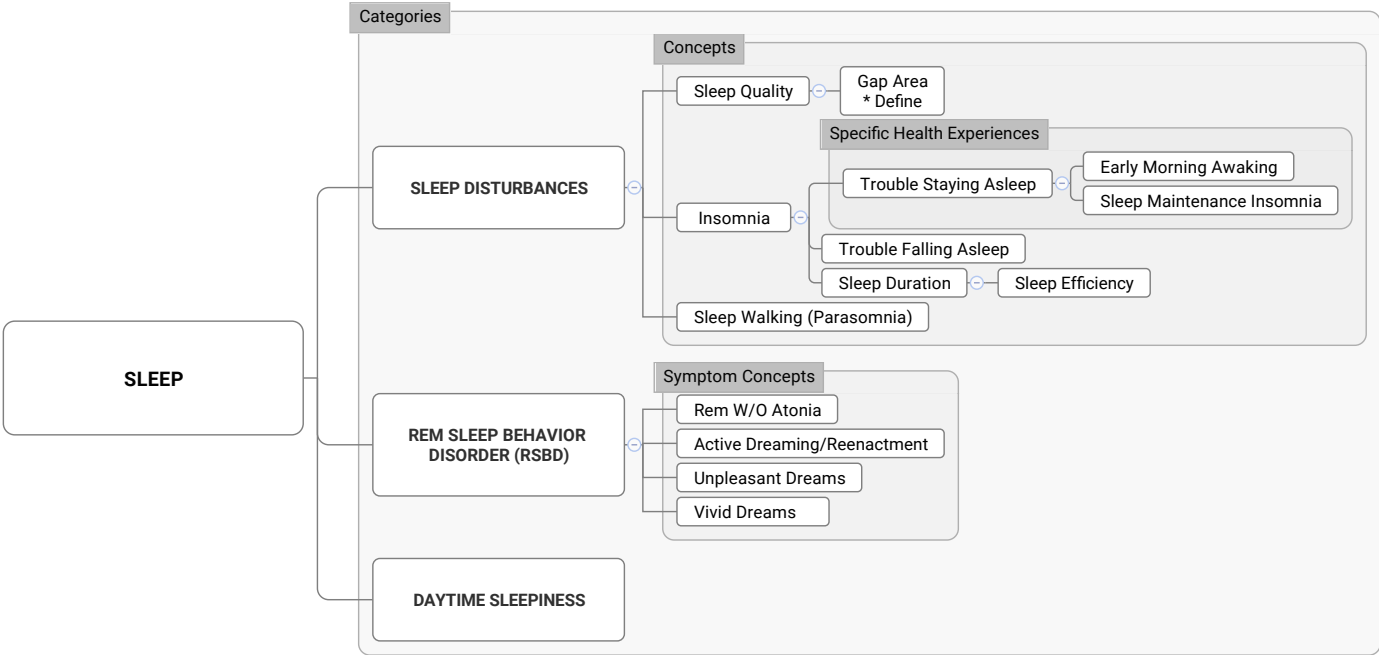

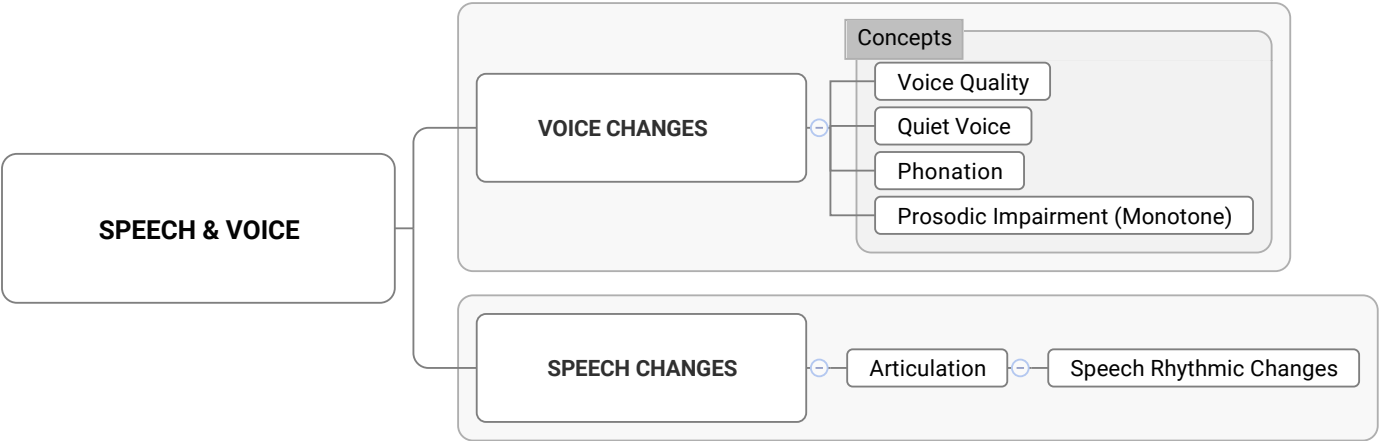

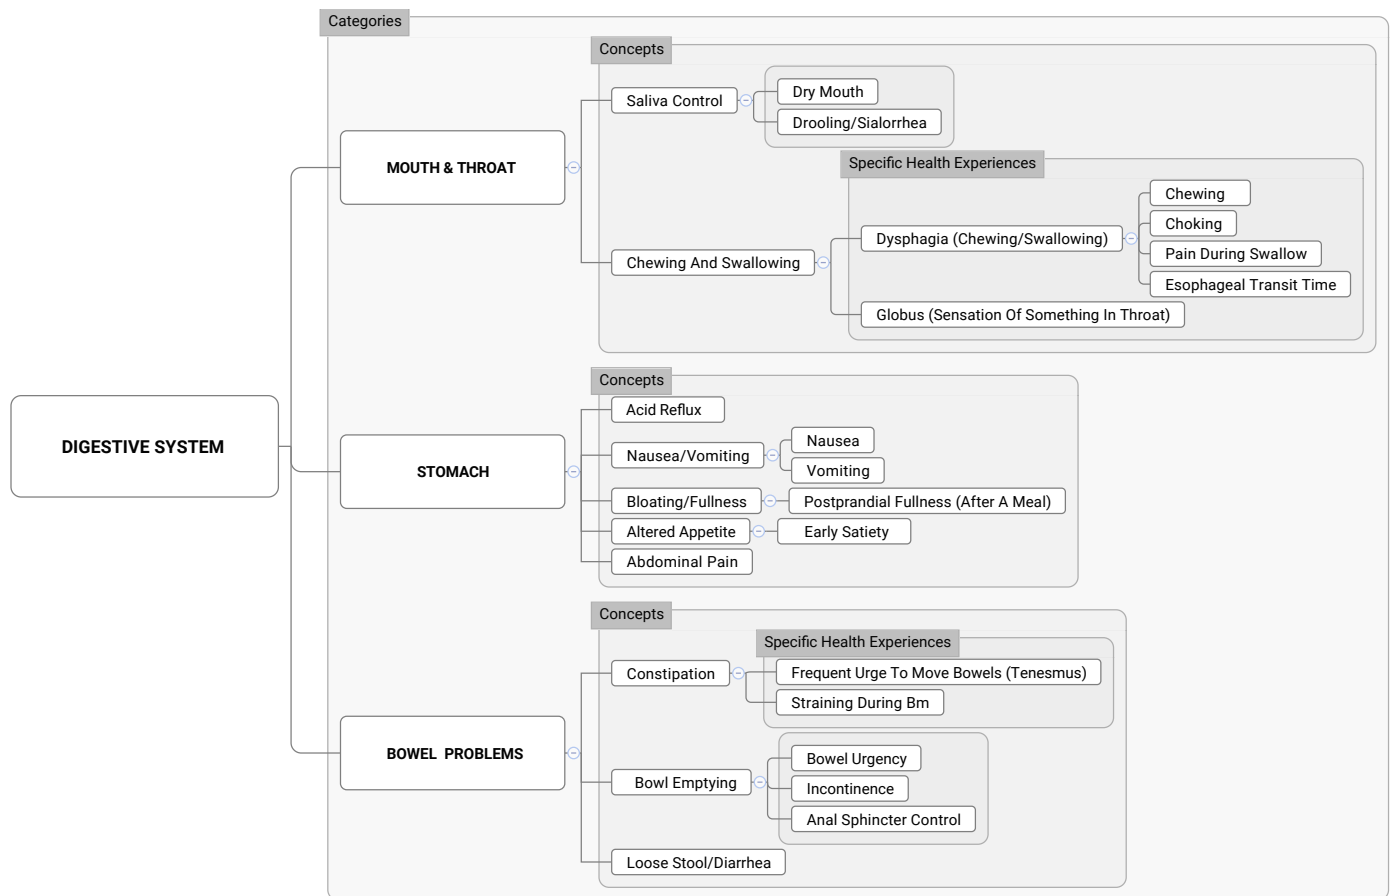



**URINARY**

Categories

**URINARY DYSFUNCTION**

Concepts

- Urinary Frequency
- Urinary Urgency
- Nocturia (Up At Night To Urinate)
- Urinary Incontinence
- Incomplete Voiding
- Weak Urine Stream
- Urinary Infections

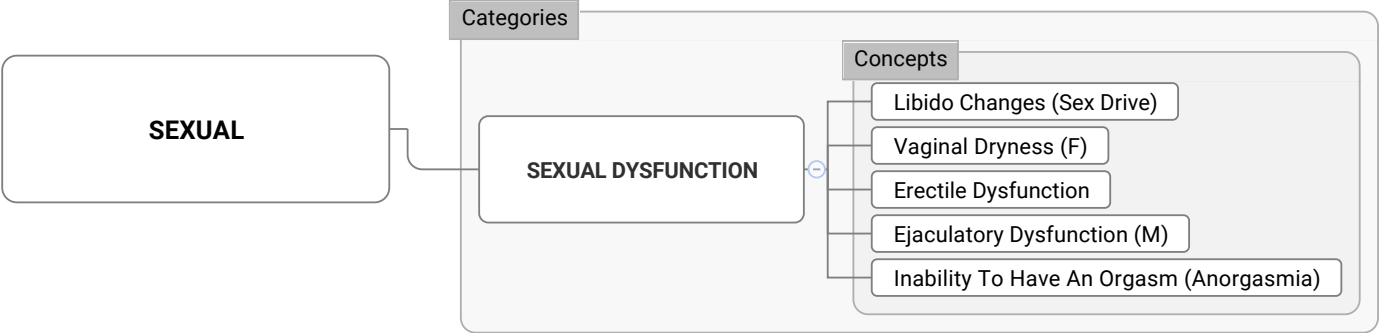

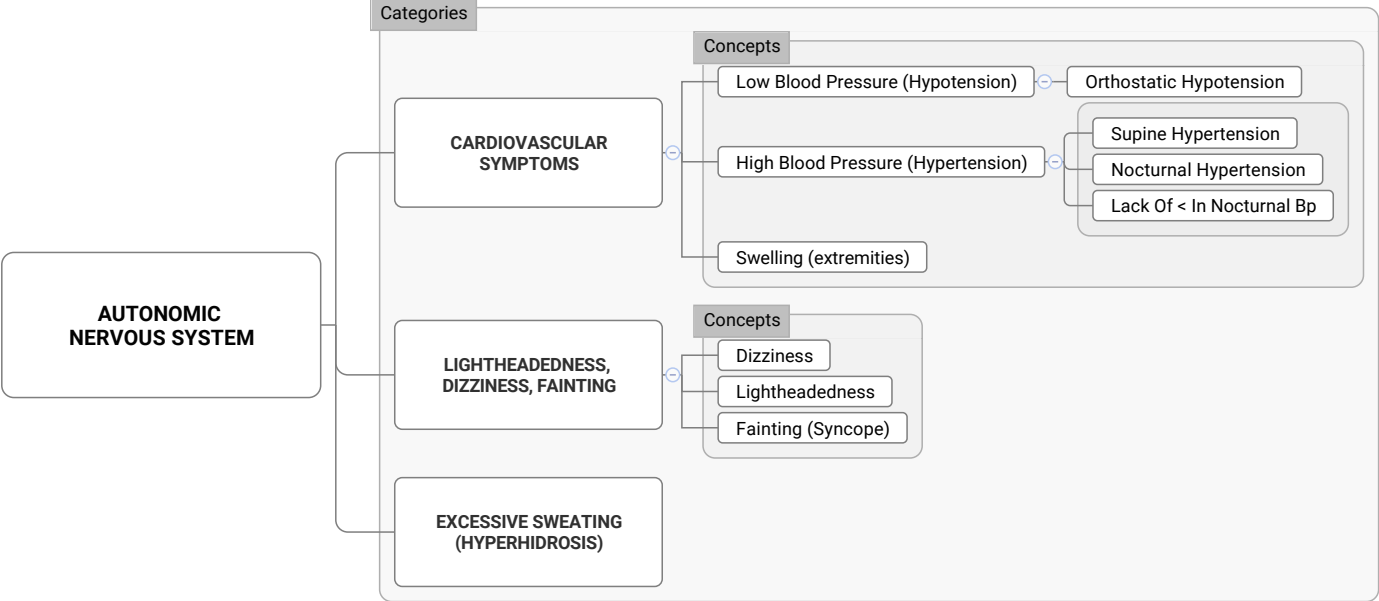

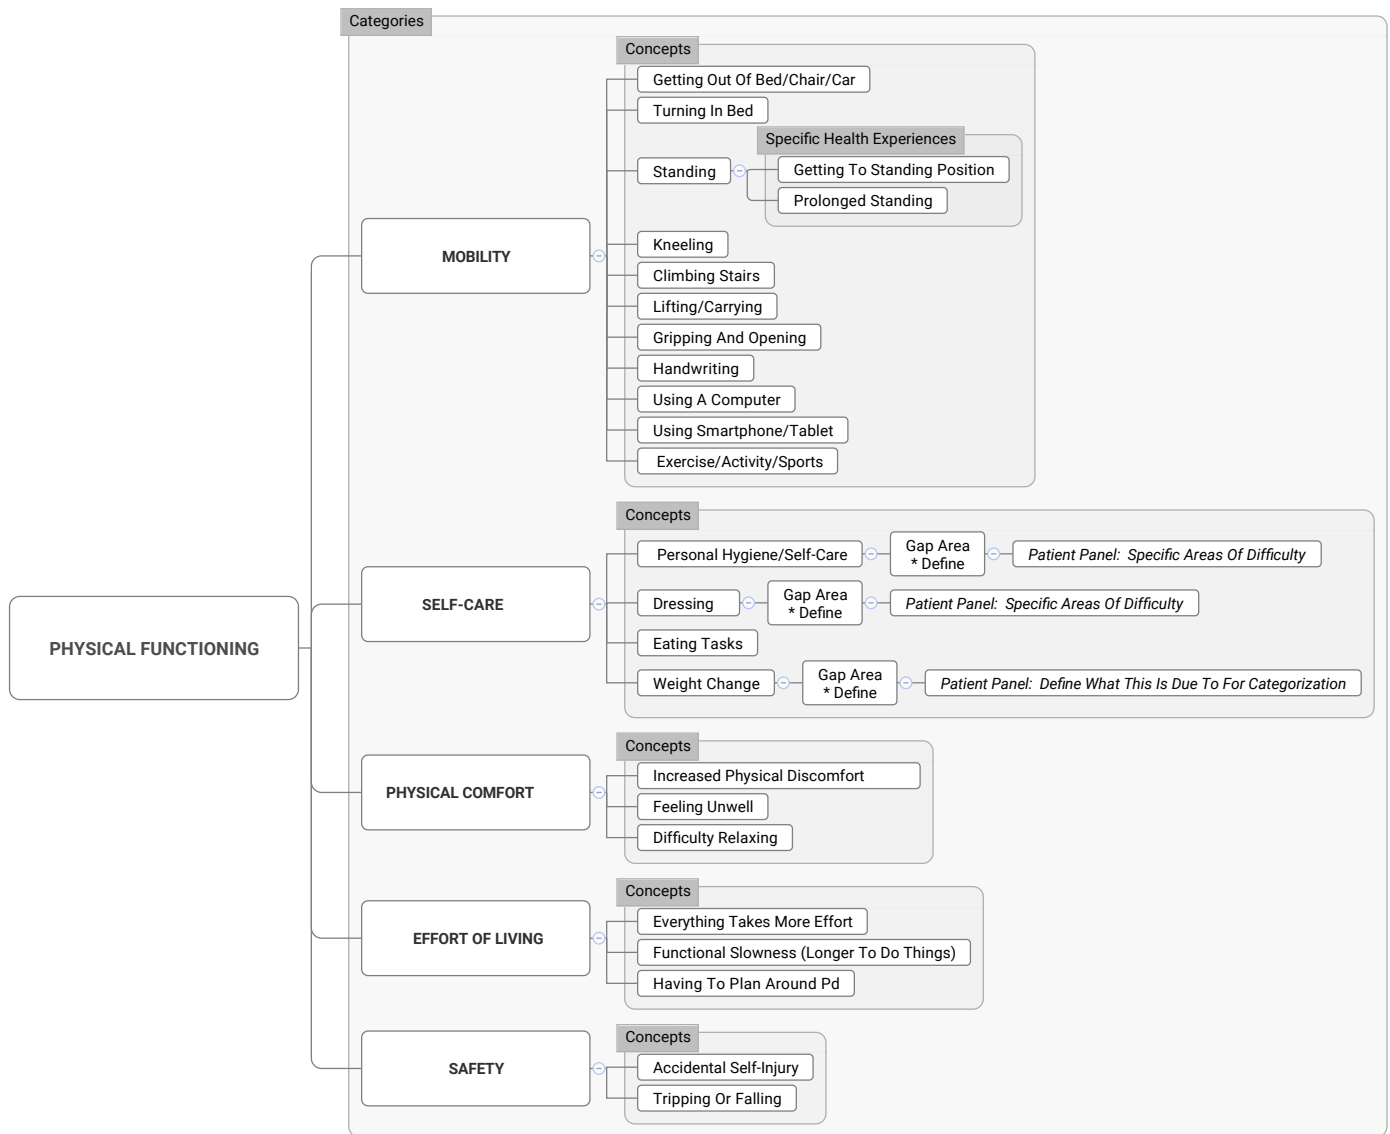

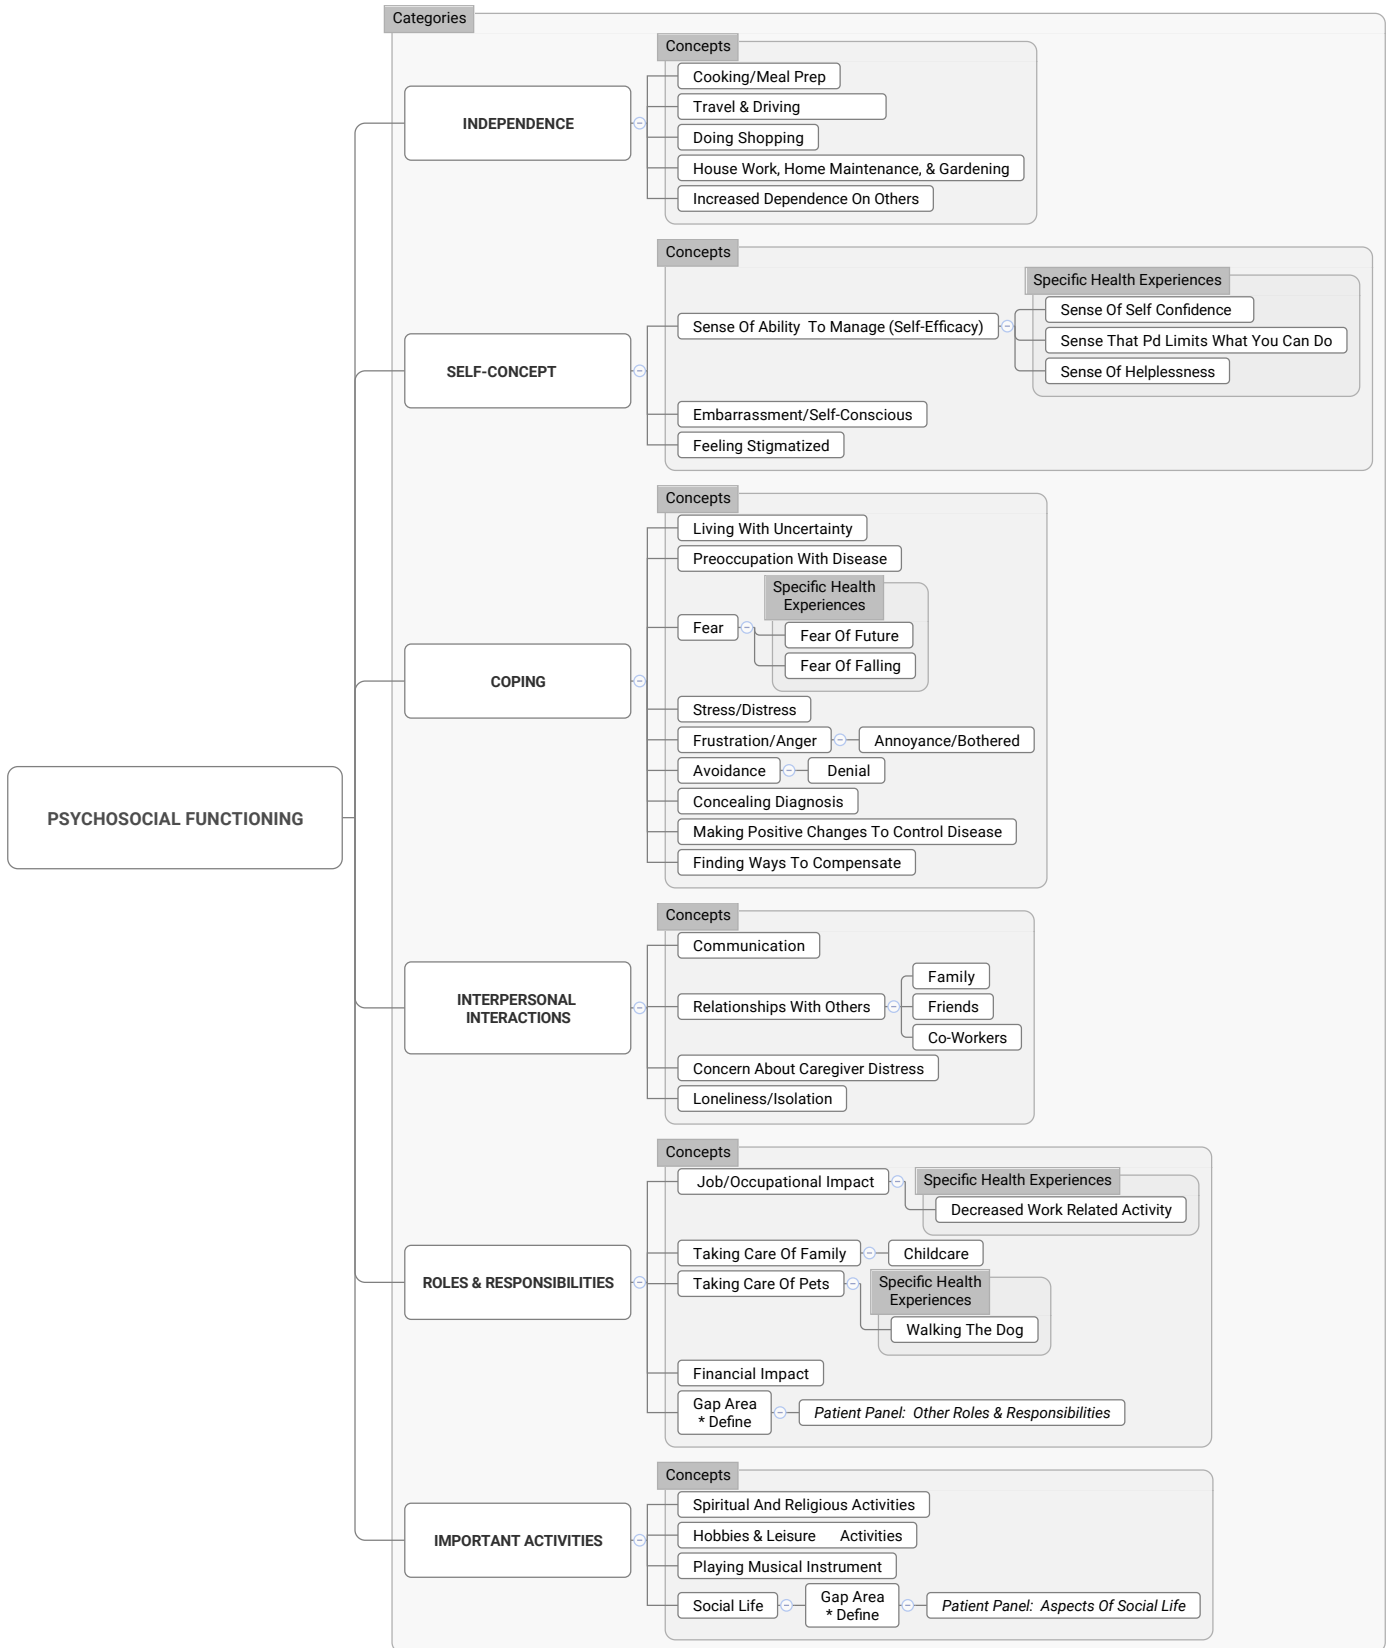

CONCEPTUAL MODEL  
OF SYMPTOMS & FUNCTIONAL IMPACTS  
IN PANDEROSIS DISEASE  
(Generalized)

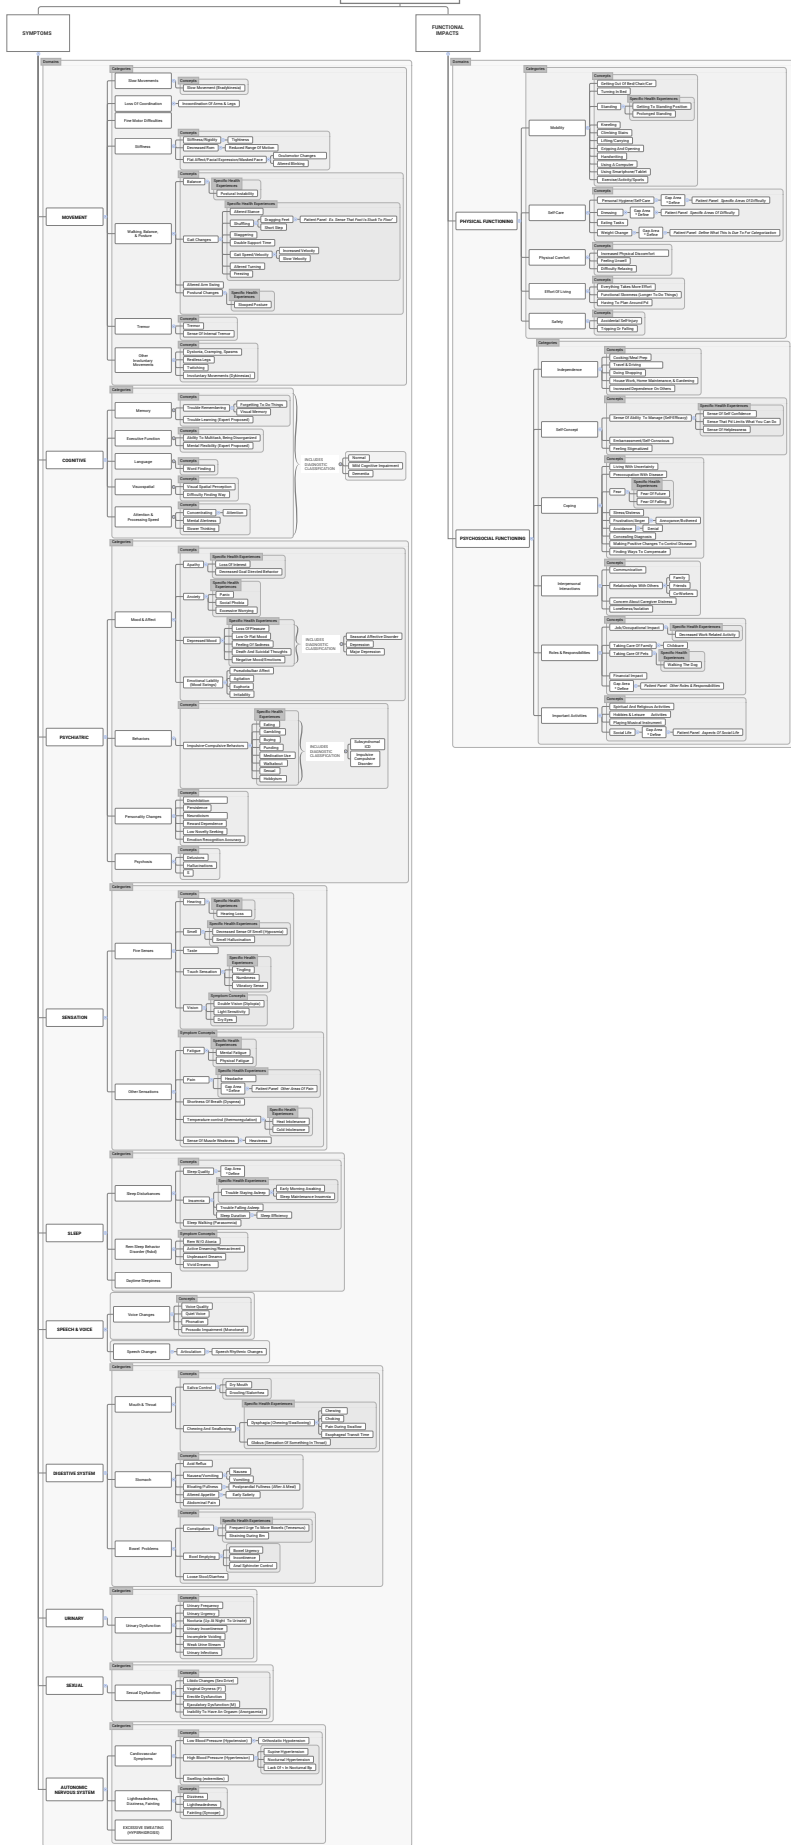

Supplement: Supplementary file 15 [file e39f601894f32a0af958a20e.pdf]
