# Supplementary material for: A consensus conceptual model of meaningful symptoms and functional impacts in early Parkinson’s Disease
Source: Research Square preprint supplement (doi:10.21203/rs.3.rs-4377805/v1), 2024-07-03
Supplement: Supplementary file 16 [file e67ee50db2701c84dce87fcb.pdf]

| Symptom term derived from literature review | Suggested modifications for use in future research          | Proposed Terminology for use as an Outcome (neutral) | Proposed Definition                                                                                                                                                      | Definition Source                 | Excludes                                                                                                                            | Relevant Clinical Terminology                    | Patient Friendly Definition                                                                                     | Comments                                                                                                                                                           |
|---------------------------------------------|-------------------------------------------------------------|------------------------------------------------------|--------------------------------------------------------------------------------------------------------------------------------------------------------------------------|-----------------------------------|-------------------------------------------------------------------------------------------------------------------------------------|--------------------------------------------------|-----------------------------------------------------------------------------------------------------------------|--------------------------------------------------------------------------------------------------------------------------------------------------------------------|
| <b>MOVEMENT DOMAIN</b>                      |                                                             |                                                      |                                                                                                                                                                          |                                   |                                                                                                                                     |                                                  |                                                                                                                 |                                                                                                                                                                    |
| Slowed movements                            |                                                             | Movement speed                                       | Slowness of the limbs or generalized whole body movements including slowness performing activities                                                                       | Common language and expert review | cognitive slowing                                                                                                                   | Hypokinesia, akinesia, bradykinesia              | Slow Movements                                                                                                  |                                                                                                                                                                    |
| Altered fine motor dexterity                |                                                             | Fine motor dexterity                                 | Impaired ability to do tasks requiring fine movement of the hand such as dressing, eating, writing, typing, etc.                                                         | Common language and expert review |                                                                                                                                     | Micrographia                                     | Reduced fine Motor Control; Hand dexterity                                                                      |                                                                                                                                                                    |
| Loss of coordination                        |                                                             | Coordination                                         | Impaired coordination of extremities or trunk, may including missing target when attempting to reach for objects, bumping into things                                    | Common language and expert review | fine motor; hand dexterity                                                                                                          |                                                  | Clumsiness, trouble with general coordination of movements                                                      |                                                                                                                                                                    |
| Stiffness                                   |                                                             |                                                      | Increased resistance with motion, may also be reported as stiffness or tightness                                                                                         | Common language and expert review | spasms, cramping, bending, twisting, dystonia                                                                                       | Rigidity, May included cogwheeling               | Stiffness                                                                                                       |                                                                                                                                                                    |
| Decreased range of motion (ROM)             |                                                             | Range of Motion                                      | Reduced ability to fully extend or flex body/extremities                                                                                                                 | Common language and expert review | stiffness, rigidity                                                                                                                 |                                                  | Inability to fully extend or flex body parts                                                                    |                                                                                                                                                                    |
| Decreased facial expression                 |                                                             | Facial expression                                    | Flat affect, expressionless facial movements                                                                                                                             | Common language and expert review |                                                                                                                                     | Masked facies, Hypomimia                         | Reduced facial expressions                                                                                      |                                                                                                                                                                    |
| Impaired eye movements                      |                                                             | Eye movements                                        | Altered eye muscle movements that include decreased blink rate or restriction of ocular movements                                                                        | Common language and expert review |                                                                                                                                     | Oculomotor dysfunction                           | Changes in movement of eyes and eyelids, NOT including double vision                                            |                                                                                                                                                                    |
| Impaired balance                            |                                                             | Balance                                              | Difficulty maintaining balance while not being supported, which may or may not include requiring support to maintain balance, and may include a tendency to trip or fall | Common language and expert review |                                                                                                                                     | Retropulsion, Postural Instability               | Impaired balance, trouble balancing                                                                             |                                                                                                                                                                    |
| Gait changes                                |                                                             | Gait                                                 | Changes in quality of walking                                                                                                                                            | Common language and expert review |                                                                                                                                     |                                                  | Changes in walking                                                                                              | Categorical concept that may have diverse aspects and include specific experiences of shuffling, altered stride length, altered turning, double support time, etc. |
| Shuffling                                   |                                                             |                                                      | Diminished foot clearance when walking resulting in dragging of the feet                                                                                                 | Common language and expert review |                                                                                                                                     |                                                  | Dragging feet when walking                                                                                      |                                                                                                                                                                    |
| Altered stride length                       |                                                             | Stride length                                        | Abnormal shortened distance between steps                                                                                                                                | Common language and expert review |                                                                                                                                     | Festination                                      | Shortened length of steps                                                                                       |                                                                                                                                                                    |
| Altered stance                              |                                                             | Stance                                               | Abnormal ability to stand independently upright on two feet which may result in compensatory foot placement                                                              | Common language and expert review |                                                                                                                                     |                                                  | Altered stance                                                                                                  |                                                                                                                                                                    |
| Altered turning                             |                                                             | Turning                                              | Interrupted or segmented turning, non-fluid changes in direction                                                                                                         | Common language and expert review |                                                                                                                                     | En bloc turning                                  | Non-fluid turns                                                                                                 |                                                                                                                                                                    |
| Altered double support time                 |                                                             | Double support time                                  | Amount of time spent while walking with two feet stabilized on the ground                                                                                                | Common language and expert review |                                                                                                                                     |                                                  | Time spent with both feet on ground when walking                                                                |                                                                                                                                                                    |
| Staggering                                  |                                                             |                                                      | Unsteady gait with redirection to maintain balance resulting in deviation from walking in a straight line                                                                | Common language and expert review |                                                                                                                                     |                                                  | Wavering, staggering                                                                                            |                                                                                                                                                                    |
| Freezing                                    |                                                             |                                                      | Failure to initiate or delay of initiation of movement, may also be the temporary arrest of ongoing movement                                                             | Common language and expert review | the 'fear of' freezing                                                                                                              |                                                  | Stuck when walking                                                                                              |                                                                                                                                                                    |
| Altered gait velocity                       |                                                             | Gait speed                                           | Slowed gait with increase transit time or faster gait with decreased transit time                                                                                        | Common language and expert review |                                                                                                                                     | Festination                                      | Change in walking speed                                                                                         |                                                                                                                                                                    |
| Altered arm swing                           |                                                             | Arm swing                                            | Irregular or reduced arm swing during walking                                                                                                                            | Common language and expert review |                                                                                                                                     |                                                  | Reduced arm swing                                                                                               |                                                                                                                                                                    |
| Postural changes                            |                                                             | Posture                                              | Deviation of trunk; any change in posture resulting in person being not fully upright                                                                                    | Common language and expert review |                                                                                                                                     | Camptocormia, Pisa Syndrome                      | Stooped Posture, leaning                                                                                        |                                                                                                                                                                    |
| Tremor                                      |                                                             |                                                      | Oscillating, rhythmic involuntary movement of any body part                                                                                                              | Common language and expert review | involuntary movements not specified as tremor or shaking, 'shakiness' related to an anxiety-related condition or internal sensation | Rest tremor, postural tremor, action tremor      | Tremor                                                                                                          |                                                                                                                                                                    |
| Internal tremor                             |                                                             |                                                      | Invisible rhythmic sensation, may be of any body part, not visually observable, but felt                                                                                 | Common language and expert review | shakiness or jitteriness reported to be due to anxiety, restlessness                                                                |                                                  | Inner sense of tremor                                                                                           |                                                                                                                                                                    |
| Twitching                                   |                                                             |                                                      | Brief, sudden, involuntary contraction of a group of muscle fibers                                                                                                       | Common language and expert review |                                                                                                                                     | Myoclonus, fasciculations                        | Twitching                                                                                                       |                                                                                                                                                                    |
| Dystonia, Cramping & Spasms                 | Consider dividing as:<br>1. Dystonia<br>2. Cramping & Spasm |                                                      | 1. Abnormal posture of a body part due to involuntary sustained muscle contraction, includes leaning<br>2. Painful contractions of muscle(s)                             | Common language and expert review | Cramping in the context of abdominal pain or gastrointestinal discomfort                                                            | Dystonia                                         | 1. Sustained involuntary muscle contraction resulting in abnormal posture of a body part<br>2. Cramping, spasms | Patients may not be able to discriminate, and these are often reported compositely in the literature.                                                              |
| Dyskinesia                                  |                                                             |                                                      | Involuntary writhing/dancing/swaying movement of the face, arms, legs or trunk; can be secondary to medication wearing off or peak dose effect                           | Common language and expert review | inner restlessness/akathisia                                                                                                        | Motor fluctuation, chorea, athetosis, Dyskinesia | Involuntary swaying movements                                                                                   |                                                                                                                                                                    |
| Restless leg                                |                                                             |                                                      | Urge to move legs that is only temporarily relieved with movement, often more severe at night but may be present during the day                                          | Common language and expert review | dyskinesias involving the legs                                                                                                      |                                                  | leg discomfort with urge to move                                                                                |                                                                                                                                                                    |
| <b>COGNITIVE DOMAIN</b>                     |                                                             |                                                      |                                                                                                                                                                          |                                   |                                                                                                                                     |                                                  |                                                                                                                 |                                                                                                                                                                    |
| Impaired cognition                          |                                                             | Cognition; cognitive abilities                       | Decline in cognitive abilities                                                                                                                                           | Common language and expert review |                                                                                                                                     | Mild cognitive impairment                        | Changes in ability to think                                                                                     |                                                                                                                                                                    |
| Dementia                                    |                                                             |                                                      | Impairment of cognitive function leading to significant limitation in domains of living                                                                                  | Common language and expert review |                                                                                                                                     | Severe cognitive impairment                      | Changes in ability to think leading to difficulty doing tasks of daily life                                     |                                                                                                                                                                    |
| Impaired memory                             |                                                             | Memory                                               | Memory function, including ability/difficulty remembering information, orientation to time/date, and short and long term recall                                          | Common language and expert review |                                                                                                                                     |                                                  | Difficulty remembering information                                                                              |                                                                                                                                                                    |
| Forgetting to do things                     |                                                             | Forgetfulness                                        | An aspect of memory; Forgetting to follow up and complete desired tasks                                                                                                  | Common language and expert review |                                                                                                                                     |                                                  | Forgetting to do things; forgetfulness                                                                          |                                                                                                                                                                    |

| Symptom term derived from literature review | Suggested modifications for use in future research   | Proposed Terminology for use as an Outcome (neutral) | Proposed Definition                                                                                                                       | Definition Source                 | Excludes                                                         | Relevant Clinical Terminology   | Patient Friendly Definition                                                                   | Comments                                                                                              |
|---------------------------------------------|------------------------------------------------------|------------------------------------------------------|-------------------------------------------------------------------------------------------------------------------------------------------|-----------------------------------|------------------------------------------------------------------|---------------------------------|-----------------------------------------------------------------------------------------------|-------------------------------------------------------------------------------------------------------|
| Impaired visual memory                      |                                                      | Visual memory                                        | Difficulties with visual recall may result in challenges navigating spaces that were once familiar                                        | Common language and expert review |                                                                  |                                 | Difficulty remembering what things look like; difficulty visually recalling how to get places |                                                                                                       |
| Impaired executive function                 |                                                      | Executive function                                   | Ability to engage in multi-level planning and decision-making to allow for successful completion of tasks                                 | Common language and expert review |                                                                  | Frontal lobe function           | Difficulty planning and making decisions                                                      |                                                                                                       |
| Impaired ability to multitask               |                                                      | Multitasking                                         | Ability to adapt and switch from one cognitive task to another or do more than one task at the same time                                  | Common language and expert review |                                                                  |                                 |                                                                                               |                                                                                                       |
| Difficulty word finding                     |                                                      | Word finding                                         | Abilities for expressing oneself verbally or recalling intended words for conversation                                                    | Common language and expert review | difficulties understanding due to hearing impairment, dysarthria | Aphasia                         |                                                                                               |                                                                                                       |
| Impaired depth perception                   |                                                      | Depth perception                                     | Ability to judge distances or depth includes orienting oneself in space and identifying spatial relationships among objects               | Common language and expert review | freezing in doorways or thresholds                               | Visual spatial                  | Depth perception                                                                              |                                                                                                       |
| Difficulty finding way                      |                                                      | Ability to find one's way                            | Becoming lost or disoriented with navigation                                                                                              | Common language and expert review |                                                                  |                                 |                                                                                               |                                                                                                       |
| Impaired attention                          |                                                      | Attention                                            | Ability to maintain focus on stimuli, tasks or conversation                                                                               | Common language and expert review |                                                                  |                                 | Attention or trouble staying focused                                                          |                                                                                                       |
| Impaired concentration                      |                                                      | Concentration                                        | Ability to maintain focus during task completion or questioning                                                                           | Common language and expert review |                                                                  |                                 | Focus                                                                                         |                                                                                                       |
| Slower thinking                             |                                                      | Cognitive processing speed                           | Slowing of mental processing. Includes difficulty keeping up with conversations or slowness to respond                                    | Common language and expert review |                                                                  |                                 | Slower thinking                                                                               |                                                                                                       |
| Impaired mental alertness                   |                                                      | Mental alertness                                     | Feeling mentally sharp and alert, or difficulty with cognitive processing that may include confused, muddled, or mixed up                 | Common language and expert review | Daytime sleepiness                                               |                                 | Brain fog                                                                                     |                                                                                                       |
| PSYCHIATRIC DOMAIN                          |                                                      |                                                      |                                                                                                                                           |                                   |                                                                  |                                 |                                                                                               |                                                                                                       |
| Apathy                                      |                                                      |                                                      | Lack of desire, motivation, or interest to participate in hobbies, socialization, or activities of daily living                           | Common language and expert review |                                                                  |                                 | Loss of interest/motivation                                                                   |                                                                                                       |
| Anxious mood                                |                                                      |                                                      | Excessive worry or fear that persists often resulting in unease or avoidance behavior                                                     | Common language and expert review |                                                                  | Anxiety                         | Nervousness, feeling anxious, anxiety                                                         |                                                                                                       |
| Social phobia                               |                                                      |                                                      | Excessive and irrational fear/anxiety when faced with social interaction                                                                  | Common language and expert review |                                                                  | Specific phobia                 | Fear of social interaction                                                                    |                                                                                                       |
| Panic                                       |                                                      |                                                      | Sudden uncontrollable and often irrational fear, intense worry that is often debilitating                                                 | Common language and expert review |                                                                  |                                 |                                                                                               |                                                                                                       |
| Depressed mood                              |                                                      |                                                      | Persistent sadness, helplessness, worthlessness, or empty mood                                                                            | Common language and expert review |                                                                  | Depression                      | Feeling down or depressed                                                                     |                                                                                                       |
| Low or flat mood                            | Consider dividing as:<br>1. Low mood<br>2. Flat mood |                                                      | 1. Low mood that the individual does not qualify as depressed mood<br>2. Mood with little variation, lessened reactivity to emotion       | Common language and expert review | Excludes feeling depressed                                       | Blunted affect                  |                                                                                               | Patients may not be able to discriminate, and these are often reported compositely in the literature. |
| Feeling of sadness                          |                                                      |                                                      | Feelings of sadness, may be associated with increased tearfulness                                                                         | Common language and expert review | suicidal ideation                                                | Depression                      | Feelings of being sad                                                                         |                                                                                                       |
| Loss of pleasure                            |                                                      | Pleasure                                             | Inability or diminished ability to feel pleasure or find enjoyment                                                                        | Common language and expert review |                                                                  | Anhedonia                       | Lack of joy and pleasure                                                                      |                                                                                                       |
| Negative feelings & emotions                |                                                      |                                                      | Persistent negative thoughts or feelings                                                                                                  | Common language and expert review | excludes feeling depressed or sad or suicidal ideation           | Pessimism                       | Negative thoughts, feeling more negative                                                      |                                                                                                       |
| Suicidal ideation or thoughts of death      |                                                      |                                                      | Thoughts of personal death either passively or with intended plan                                                                         | Common language and expert review |                                                                  | Suicidality                     | Thoughts of death or suicide                                                                  |                                                                                                       |
| Pseudobulbar affect                         |                                                      |                                                      | Sudden uncontrollable strong emotional expression (ex. crying/laughing) at times seemingly unprovoked and not matching internal feelings  | Common language and expert review |                                                                  | Emotional lability              | Sudden laughing/crying that does not relate to your feelings                                  |                                                                                                       |
| Irritability                                |                                                      |                                                      | Easily frustrated or annoyed often over seemingly small matters                                                                           | Common language and expert review |                                                                  |                                 | Easily frustrated or annoyed                                                                  |                                                                                                       |
| Euphoria                                    |                                                      |                                                      | Feeling of extreme happiness or excitement                                                                                                | Common language and expert review |                                                                  |                                 | Intense happiness that may be excessive for the situation                                     |                                                                                                       |
| Agitation                                   |                                                      |                                                      | Heightened restlessness/nervousness which may more easily lead to an angered response                                                     | Common language and expert review |                                                                  |                                 | Restless and on edge                                                                          |                                                                                                       |
| Impulsive behaviors                         |                                                      |                                                      | Difficulty controlling behaviors resulting in inability to resist temptation, often resulting in actions that are atypical for the person | Common language and expert review |                                                                  | Impulsivity                     | Doing things impulsively in response to urges that are difficult to control                   |                                                                                                       |
| Medication use compulsion                   |                                                      |                                                      | Pattern of medication use of dysregulated over consumption and loss of control or urge towards increased intake                           | Common language and expert review |                                                                  | Dopamine dysregulation syndrome | Medication overuse due to an urge to take more than prescribed                                |                                                                                                       |
| Buying compulsion                           |                                                      |                                                      | Excessive urge or tendency to shop or spend money often with adverse consequence                                                          | Common language and expert review |                                                                  | Oniomania                       | Excessive shopping urge                                                                       |                                                                                                       |
| Eating compulsion                           |                                                      |                                                      | Intense urge or tendency to over eat despite not being hungry                                                                             | Common language and expert review |                                                                  | Hyperphagia                     | Excessive food cravings                                                                       |                                                                                                       |
| Sexual compulsion                           |                                                      |                                                      | Heightened focus on sexual urges or behaviors often with limited self-control                                                             | Common language and expert review |                                                                  | Hypersexuality                  | Excessive sexual urge                                                                         |                                                                                                       |
| Punding compulsion                          |                                                      |                                                      | Intense fascination of repetitive non-goal oriented mechanical tasks, may include assembling/disassembling and sorting                    | Common language and expert review | Obsessive Compulsive Disorder                                    |                                 | Doing tasks repetitively without a reasonable goal (e.g. repetitive sorting)                  |                                                                                                       |
| Gambling compulsion                         |                                                      |                                                      | Excessive urge or tendency to bet or gamble often with adverse consequence                                                                | Common language and expert review |                                                                  | Pathological gambling           | Excessive urge to gamble                                                                      |                                                                                                       |
| Walkabout compulsion                        |                                                      |                                                      | Persistent urge to walk often aimlessly without intended destination                                                                      | Common language and expert review |                                                                  |                                 | Excessive urge to wander about                                                                |                                                                                                       |
| Hobbyism compulsion                         |                                                      |                                                      | Uncontrollable urge to carry out or pursue a hobby often prioritizing above other responsibilities                                        | Common language and expert review |                                                                  |                                 | Excessive urge to do a hobby                                                                  |                                                                                                       |

| Symptom term derived from literature review | Suggested modifications for use in future research | Proposed Terminology for use as an Outcome (neutral) | Proposed Definition                                                                                                                                                                                                             | Definition Source                 | Excludes                                                    | Relevant Clinical Terminology | Patient Friendly Definition                                                         | Comments                                                               |
|---------------------------------------------|----------------------------------------------------|------------------------------------------------------|---------------------------------------------------------------------------------------------------------------------------------------------------------------------------------------------------------------------------------|-----------------------------------|-------------------------------------------------------------|-------------------------------|-------------------------------------------------------------------------------------|------------------------------------------------------------------------|
| Psychosis                                   |                                                    |                                                      | Condition in which thoughts, emotions, or perceptions are lost to reality and often with limited insight                                                                                                                        | Common language and expert review |                                                             |                               | Difficulty telling what is real and what is not real                                |                                                                        |
| Delusions                                   |                                                    |                                                      | False belief or distortion of reality that persists despite evidence to the contrary                                                                                                                                            | Common language and expert review |                                                             |                               | mistaken beliefs about things that aren't real                                      |                                                                        |
| Hallucinations                              |                                                    |                                                      | Seeing, hearing, feeling, tasting, or smelling something that is not actually present, includes sensations of someone or something passing nearby in periphery                                                                  | Common language and expert review | Misperception due to visual impairment                      |                               | Seeing and hearing things that aren't real (e.g. visions or sounds)                 |                                                                        |
| Smell hallucinations                        |                                                    |                                                      | Smelling something that is not present or perceived by others; Subset of hallucinations                                                                                                                                         | Common language and expert review |                                                             | Olfactory hallucination       | Smelling things that are not there.                                                 |                                                                        |
| Personality changes                         |                                                    |                                                      | Altered manner in how one thinks, acts, or feels that are distinctly uncharacteristic, may affect interactions with others                                                                                                      | Common language and expert review |                                                             |                               | Personality changes                                                                 |                                                                        |
| Excessive persistence                       |                                                    |                                                      | Determination to complete tasks often with inflexibility or with fixated thought                                                                                                                                                | Common language and expert review |                                                             | Perseveration                 | Feeling compelled to keep doing something                                           | Not enough information; present in one study.                          |
| Reward seeking behavior                     |                                                    |                                                      | Increased tendency to seek approval or respond to rewarding stimuli                                                                                                                                                             | Common language and expert review |                                                             | Reward dependence             | Reward seeking behavior                                                             |                                                                        |
| Disinhibition                               |                                                    |                                                      | Inability to regulate behaviors or thoughts within bounds of socially acceptable behavior                                                                                                                                       | Common language and expert review |                                                             | Frontal lobe function         | Inability to control behaviors in a way that is socially acceptable; Loss of filter |                                                                        |
| Neuroticism                                 |                                                    |                                                      | Increased distress or dissatisfaction with oneself or external circumstance                                                                                                                                                     | Common language and expert review |                                                             |                               | Easily frazzled                                                                     |                                                                        |
| Impaired emotion recognition                |                                                    | Emotion recognition accuracy                         | Inability to successfully recognize and interpret others emotions                                                                                                                                                               | Common language and expert review |                                                             |                               | Trouble recognizing others feelings and emotions                                    |                                                                        |
| Low novelty seeking                         |                                                    | Novelty seeking                                      | Tendency to avoid the pursuit of new or exciting experiences and situations                                                                                                                                                     | Common language and expert review |                                                             |                               | Limited interest in trying new things                                               |                                                                        |
| <b>SENSORY DOMAIN</b>                       |                                                    |                                                      |                                                                                                                                                                                                                                 |                                   |                                                             |                               |                                                                                     |                                                                        |
| Double Vision                               |                                                    |                                                      | Seeing two of the same objects simultaneously                                                                                                                                                                                   | Common language and expert review |                                                             | Diplopia                      | Double vision                                                                       |                                                                        |
| Light sensitivity                           |                                                    |                                                      | Discomfort when placed in bright environments                                                                                                                                                                                   | Common language and expert review |                                                             | Photosensitivity              | Visually sensitive to light; light sensitivity                                      |                                                                        |
| Dry eyes                                    |                                                    |                                                      | Limited tear production which may result in eye irritation or discomfort                                                                                                                                                        | Common language and expert review |                                                             | Xerophthalmia                 | Dry eyes                                                                            |                                                                        |
| Altered taste                               |                                                    | Taste                                                | Changes in quality of the taste of food                                                                                                                                                                                         | Common language and expert review |                                                             | Gustation                     | Altered sense of taste                                                              |                                                                        |
| Altered smell                               |                                                    | Smell                                                | Changes in quality of smell, may include food but also surrounding environment                                                                                                                                                  | Common language and expert review |                                                             | Olfaction                     | Altered sense of smell                                                              |                                                                        |
| Impaired hearing                            |                                                    | Hearing                                              | Changes in quality of hearing, may include distortions of sound or diminished ability to perceive/interpret sound                                                                                                               | Common language and expert review | Does not include auditory hallucination                     | Auditory perception           | Altered sense of hearing                                                            |                                                                        |
| Impaired sensation                          |                                                    | Sensation                                            | Changes in quality of touch sensation, may include light touch, pressure, or sensory disturbance not otherwise specified below                                                                                                  | Common language and expert review |                                                             | Tactile perception            | Altered touch sensation                                                             |                                                                        |
| Impaired sensation in hands and feet        |                                                    |                                                      | Subset of impaired sensation: Numbness or sensory disturbance most pronounced of distal arms/legs                                                                                                                               | Common language and expert review |                                                             | Peripheral neuropathy         | Numbness or tingling of hands/feet                                                  |                                                                        |
| Impaired vibratory sense                    |                                                    | Vibratory sense                                      | Impaired ability to perceive vibratory stimuli                                                                                                                                                                                  | Common language and expert review |                                                             |                               | Loss of ability to feel vibrations (skin)                                           |                                                                        |
| Numbness                                    |                                                    |                                                      | Diminished ability to perceive to tactile stimuli                                                                                                                                                                               | Common language and expert review |                                                             |                               | Loss of sensation in skin                                                           |                                                                        |
| Tingling                                    |                                                    |                                                      | Sensory disturbance that may be compared to pins and needles or when an extremity 'falls asleep' following restricted blood flow                                                                                                | Common language and expert review |                                                             |                               | Tingling sensation in skin                                                          |                                                                        |
| Impaired temperature sensation              |                                                    | Temperature sensation                                | Impaired ability to differentiate between hot and cold                                                                                                                                                                          | Common language and expert review |                                                             | Thermosensation               | Altered ability to feel hot and cold                                                |                                                                        |
| Pain                                        |                                                    |                                                      | Body pain or discomfort due to any cause including cramping, spasms, or neuropathy                                                                                                                                              | Common language and expert review |                                                             | Nociception                   | Pain, physical discomfort                                                           |                                                                        |
| Headache                                    |                                                    |                                                      | Head pain or discomfort due to any cause                                                                                                                                                                                        | Common language and expert review |                                                             |                               | Headache                                                                            |                                                                        |
| Fatigue - General                           |                                                    | Energy level                                         | Overall lack of energy not otherwise specified                                                                                                                                                                                  | Common language and expert review | sleepiness                                                  |                               | lack of energy; feeling too tired to do things                                      |                                                                        |
|                                             |                                                    |                                                      | Sense of mental exhaustion not explained by drug effects or other psychiatric condition, includes feeling exhausted during intellectually challenging tasks or decreased capacity to sustain cognitively challenging activities | Common language and expert review | sleepiness                                                  |                               | Feeling mentally exhausted                                                          |                                                                        |
| Fatigue - Mental                            |                                                    | Mental energy                                        |                                                                                                                                                                                                                                 | Common language and expert review | sleepiness                                                  |                               | Feeling physically exhausted                                                        |                                                                        |
| Fatigue - Physical                          |                                                    | Physical energy                                      | Exhaustion or tiredness of the body                                                                                                                                                                                             | Common language and expert review | Does not included proportionate exercise induced SOB        |                               |                                                                                     |                                                                        |
| Shortness of breath                         |                                                    |                                                      | Difficult or labored breathing                                                                                                                                                                                                  | Common language and expert review |                                                             | Dyspnea                       | Feeling abnormally short of breath                                                  |                                                                        |
| Muscle weakness                             |                                                    | Muscle strength                                      | Diminished ability to produce maximal motor strength                                                                                                                                                                            | Common language and expert review |                                                             |                               | Loss of strength; feeling weak                                                      |                                                                        |
| Heaviness                                   |                                                    |                                                      | Maximal strength is preserved but takes more effort or energy to exert force or make movement                                                                                                                                   | Common language and expert review |                                                             |                               | Sensation of heavy limbs such that physical tasks require more effort               | Infrequently reported and may confound with muscle weakness or fatigue |
| Impaired body temperature control           |                                                    | Body temperature control                             | Feeling (perception) of being either excessively hot or cold, may include generalized sensation or be specific to certain parts of the body                                                                                     | Common language and expert review | chills or sensory disturbances secondary to fever/infection | Thermoregulation              | Difficulty managing body temperature; Feeling excessively hot or cold               |                                                                        |
| Heat intolerance                            |                                                    |                                                      | Significant discomfort when placed in warm temperature environments                                                                                                                                                             | Common language and expert review |                                                             |                               | Feeling abnormally hot                                                              |                                                                        |

| Symptom term derived from literature review               | Suggested modifications for use in future research | Proposed Terminology for use as an Outcome (neutral) | Proposed Definition                                                                                                                                  | Definition Source                 | Excludes                                                                                   | Relevant Clinical Terminology | Patient Friendly Definition                                | Comments                                                                              |
|-----------------------------------------------------------|----------------------------------------------------|------------------------------------------------------|------------------------------------------------------------------------------------------------------------------------------------------------------|-----------------------------------|--------------------------------------------------------------------------------------------|-------------------------------|------------------------------------------------------------|---------------------------------------------------------------------------------------|
| Cold intolerance<br><b>SLEEP DOMAIN</b>                   |                                                    |                                                      | Significant discomfort when placed in cold temperature environments                                                                                  | Common language and expert review |                                                                                            |                               | Feeling abnormally cold                                    |                                                                                       |
| Altered Sleep                                             |                                                    | Sleep                                                | Changes in patterns or behaviors when trying to sleep                                                                                                | Common language and expert review |                                                                                            |                               | Sleep changes                                              |                                                                                       |
| Sleep disturbances (general term)                         |                                                    |                                                      | Undesired interruptions or disruptions of sleep                                                                                                      | Common language and expert review |                                                                                            |                               | Disturbed or interrupted sleep                             |                                                                                       |
| Reduced sleep quality                                     |                                                    | Sleep quality                                        | Perception of not having a good night of sleep                                                                                                       | Common language and expert review |                                                                                            |                               | Quality of sleep; sleeping well                            |                                                                                       |
| Sleep onset insomnia                                      |                                                    |                                                      | Difficulty falling asleep at the beginning of the sleep period                                                                                       | Common language and expert review | difficulties initiating sleep due to restless legs                                         |                               | Difficulty falling asleep                                  |                                                                                       |
| Sleep maintenance insomnia                                |                                                    |                                                      | Difficulty staying asleep; Awakening during the night with difficulty falling asleep again                                                           | Common language and expert review | brief awakenings (ex. due to trips to the bathroom) without difficulty falling back asleep |                               | Difficulty staying asleep; interrupted sleep; broken sleep |                                                                                       |
| Early morning awakening                                   |                                                    |                                                      | Waking up too early with difficulty falling back to sleep                                                                                            | Common language and expert review | Does not included planned early morning wakening, such as for occupation                   |                               | Waking up too early                                        |                                                                                       |
| Altered sleep duration & efficiency                       |                                                    | Sleep duration & efficiency                          | Changes in how long one sleeps and overall time one maintains sleep, how restful one feels upon awakening                                            | Common language and expert review |                                                                                            |                               | How long you stay asleep                                   |                                                                                       |
| Sleep talking/walking                                     |                                                    |                                                      | Vocalizations, talking, or walking during sleep without awareness of behavior                                                                        | Common language and expert review | dream enactment, sleep paralysis                                                           |                               |                                                            |                                                                                       |
| REM Sleep Behavior Disorder (RBD)                         |                                                    | REM sleep                                            | Acting out dreams, movements or vocalizations during sleep; may only be aware due to partner report; may at times cause patient to awaken            | Common language and expert review | moving in sleep without further specification                                              | REM Sleep Behavior Disorder   | Acting out dreams                                          |                                                                                       |
| Vivid dreams                                              |                                                    |                                                      | Any report of vivid or detailed dreams, dreams that seem real or can recall in great detail upon awakening                                           | Common language and expert review |                                                                                            |                               | Intense memorable dreams                                   |                                                                                       |
| Unpleasant dreams                                         |                                                    |                                                      | Intense dreams, nightmares                                                                                                                           | Common language and expert review |                                                                                            |                               |                                                            |                                                                                       |
| Daytime sleepiness<br><b>SPEECH &amp; VOICE DOMAIN</b>    |                                                    |                                                      | Urge or need to sleep in situations when is sleep not desired or appropriate, may lead to intentional or unintentional sleep during the day          | Common language and expert review | tiredness or fatigue without needing to sleep/nap                                          | Hypersomnia                   |                                                            |                                                                                       |
| Impaired articulation                                     |                                                    | Pronunciation                                        | Ability to form clear distinct sounds, clarity of speech production                                                                                  | Common language and expert review |                                                                                            | Dysarthria                    | Clarity of speech                                          | Patient confound articulation with being articulate; Pronunciation is preferred term. |
| Impaired phonation                                        |                                                    |                                                      | Ability to produce sound from the vocal tract                                                                                                        | Common language and expert review |                                                                                            |                               | Ability to produce sound                                   |                                                                                       |
| Monotone voice                                            |                                                    |                                                      | Lack of vocal fluctuation in tone or rhythm                                                                                                          | Common language and expert review |                                                                                            | Monotone; Prosodic impairment | Intonation/rhythm of speech                                |                                                                                       |
| Hypophonia                                                |                                                    |                                                      | Low speech volume/amplitude, difficulty projecting voice                                                                                             | Common language and expert review |                                                                                            |                               | Quiet voice                                                |                                                                                       |
| Altered voice quality                                     |                                                    | Voice quality                                        | Changes in character or quality of voice not otherwise specified (e.g., raspiness)                                                                   | Common language and expert review |                                                                                            |                               |                                                            |                                                                                       |
| Impaired verbal fluency<br><b>DIGESTIVE SYSTEM DOMAIN</b> |                                                    | Verbal fluency                                       | Impaired ability to produce desired vocabulary when communicating                                                                                    | Common language and expert review |                                                                                            |                               | Ease of word production                                    |                                                                                       |
| Drooling                                                  |                                                    |                                                      | Difficulty managing saliva with overflow out of the mouth                                                                                            | Common language and expert review |                                                                                            | Sialorrhea                    |                                                            |                                                                                       |
| Dry mouth                                                 |                                                    |                                                      | Sensation of inadequate saliva production                                                                                                            | Common language and expert review |                                                                                            | Xerostomia                    |                                                            |                                                                                       |
| Globus sensation                                          |                                                    |                                                      | Sensation of having something stuck in one's throat                                                                                                  | Common language and expert review |                                                                                            | Globus pharyngis              |                                                            |                                                                                       |
| Impaired swallowing                                       |                                                    | Swallowing                                           | Swallowing impairment that may result in coughing/choking when trying to ingest food and drink                                                       | Common language and expert review |                                                                                            | Aspiration; Dysphagia         | Swallowing difficulties                                    |                                                                                       |
| Altered chewing                                           |                                                    | Chewing                                              | Changes in ability to masticate food to allow for succesful feeding                                                                                  | Common language and expert review |                                                                                            | Mastication                   |                                                            |                                                                                       |
| Pain during swallow                                       |                                                    |                                                      | Pain or discomfort of any part of the oropharynx or digestive tract provoked by swallowing                                                           | Common language and expert review |                                                                                            | Odynophagia                   |                                                            |                                                                                       |
| Altered esophageal transit time                           |                                                    | Esophageal transit time                              | Changes in the amount of time it takes for food/drink to traverse down the esophagus into the stomach                                                | Common language and expert review |                                                                                            |                               | Time it takes for food to enter stomach                    |                                                                                       |
| Acid reflux                                               |                                                    |                                                      | Upper abdominal/chest discomfort caused by stomach acid irritating the lower part of the esophagus often worsened following meals or when lying down | Common language and expert review |                                                                                            | GERD                          | Heartburn                                                  |                                                                                       |
| Early fullness                                            |                                                    |                                                      | Feeling full after only a small amount of food intake                                                                                                | Common language and expert review |                                                                                            | Early satiety                 | Feeling full quickly                                       |                                                                                       |
| Abdominal pain                                            |                                                    |                                                      | Pain or discomfort attributed to the GI tract                                                                                                        | Common language and expert review |                                                                                            |                               | Stomach or belly pain or ache                              |                                                                                       |
| Nausea & Vomiting                                         |                                                    |                                                      | Sensation of stomach discomfort with concern that one may vomit or progresion to vomiting                                                            | Common language and expert review |                                                                                            | Emesis                        |                                                            |                                                                                       |
| Bloating/Fullness                                         |                                                    |                                                      | Feeling of abdominal fullness/tightness often with associated distention                                                                             | Common language and expert review |                                                                                            | Gastroparesis                 | Belly feeling full or large                                |                                                                                       |
| Appetite changes                                          |                                                    | Appetite                                             | Changes in desire to eat, may result in either weight loss or weight gain                                                                            | Common language and expert review |                                                                                            |                               |                                                            |                                                                                       |
| Constipation                                              |                                                    |                                                      | Difficulty with passage of stool, often accompanied by hardened feces                                                                                | Common language and expert review |                                                                                            | Fecal impaction               |                                                            |                                                                                       |

| Symptom term derived from literature review | Suggested modifications for use in future research | Proposed Terminology for use as an Outcome (neutral) | Proposed Definition                                                                                                                   | Definition Source                 | Excludes                                                         | Relevant Clinical Terminology | Patient Friendly Definition                                          | Comments                                                               |
|---------------------------------------------|----------------------------------------------------|------------------------------------------------------|---------------------------------------------------------------------------------------------------------------------------------------|-----------------------------------|------------------------------------------------------------------|-------------------------------|----------------------------------------------------------------------|------------------------------------------------------------------------|
| Tenesmus                                    |                                                    |                                                      | Urge to pass stool accompanied by pain/cramping and often unsuccessful with limited defecation                                        | Common language and expert review | pain passing hard stool                                          |                               | Feeling the need to pass stool without being able to; may be painful |                                                                        |
| Straining                                   |                                                    |                                                      | Increased required force or effort exerted during bowel movements                                                                     | Common language and expert review |                                                                  |                               |                                                                      |                                                                        |
| Bowel urgency                               |                                                    |                                                      | The need to suddenly relieve bowels to prevent accidental soiling                                                                     | Common language and expert review |                                                                  |                               |                                                                      |                                                                        |
| Bowel incontinence                          |                                                    |                                                      | Loss of ability to hold bowels often without forewarning leading to involuntary soiling                                               | Common language and expert review |                                                                  | Encopresis                    | Losing control of stool leading to soiling                           |                                                                        |
| Impaired anal sphincter control             |                                                    |                                                      | Impaired ability to willingly tighten or loosen one's anal sphincter to allow for coordination of bowel movements                     | Common language and expert review |                                                                  |                               |                                                                      |                                                                        |
| Diarrhea                                    |                                                    |                                                      | Bowel movements of loose or watery consistency                                                                                        | Common language and expert review |                                                                  |                               | Loose stool                                                          |                                                                        |
| URINARY DOMAIN                              |                                                    |                                                      |                                                                                                                                       |                                   |                                                                  |                               |                                                                      |                                                                        |
| Urinary Frequency                           |                                                    |                                                      | The need to pass urine more frequently than typical or desired                                                                        | Common language and expert review |                                                                  |                               | Urge to urinate frequently                                           |                                                                        |
| Urinary Urgency                             |                                                    |                                                      | The need to suddenly relieve urine often without forewarning                                                                          | Common language and expert review |                                                                  |                               | Urge to urinate suddenly                                             |                                                                        |
| Nocturia                                    |                                                    |                                                      | Awakening at night to urinate, may occur multiple times per night and disrupt sleep                                                   | Common language and expert review |                                                                  |                               | Need to urinate at night                                             |                                                                        |
| Incomplete voiding                          |                                                    |                                                      | Inability to fully void urine from bladder                                                                                            | Common language and expert review |                                                                  |                               | incomplete bladder emptying                                          |                                                                        |
| Urinary Incontinence                        |                                                    |                                                      | Loss of ability to hold urine or regulate desired timing of urination                                                                 | Common language and expert review |                                                                  |                               | Loss of bladder control                                              |                                                                        |
| Urinary Infections                          |                                                    |                                                      | Associated infections of the urinary system                                                                                           | Common language and expert review |                                                                  | Urinary tract infection       |                                                                      |                                                                        |
| Weak urine stream                           |                                                    |                                                      | Diminished outflow velocity when urinating                                                                                            | Common language and expert review |                                                                  | Urinary hesitancy             |                                                                      |                                                                        |
| SEXUAL DOMAIN                               |                                                    |                                                      |                                                                                                                                       |                                   |                                                                  |                               |                                                                      |                                                                        |
| Sexual dysfunction                          |                                                    | Sexual function                                      | Difficulties with sexual response, desire, or performance not otherwise specified                                                     | Common language and expert review |                                                                  |                               |                                                                      |                                                                        |
| Trouble achieving orgasm                    |                                                    | Ability to achieve orgasm                            | Absent, delayed, or diminished orgasm following adequate sexual stimulation                                                           | Common language and expert review |                                                                  | Anorgasmia                    | Difficulty achieving orgasm                                          |                                                                        |
| Ejaculatory dysfunction                     |                                                    | Ability to ejaculate                                 | Absent, delayed, diminished, or premature ability to ejaculate during sexual intercourse                                              | Common language and expert review |                                                                  |                               | Difficulty ejaculating or early ejaculation                          |                                                                        |
| Erectile dysfunction                        |                                                    | Ability to achieve erection                          | Difficulty achieving or maintaining an erection during sex                                                                            | Common language and expert review |                                                                  | Impotence                     |                                                                      |                                                                        |
| Impaired libido                             |                                                    | Libido; sexual desire                                | Lack of interest in sexual activity                                                                                                   | Common language and expert review |                                                                  |                               | Low sex drive                                                        |                                                                        |
| Vaginal dryness                             |                                                    |                                                      | Dryness of the vagina, often may lead to irritation or pain with intercourse                                                          | Common language and expert review |                                                                  | Vaginal atrophy               |                                                                      |                                                                        |
| AUTONOMIC NERVOUS SYSTEM DOMAIN             |                                                    |                                                      |                                                                                                                                       |                                   |                                                                  |                               |                                                                      |                                                                        |
| Orthostatic hypotension                     |                                                    | Blood pressure                                       | Low blood pressure provoked with standing from sitting or lying down, may result in lightheadedness or episodes of passing out        | Common language and expert review |                                                                  |                               | Low blood pressure when standing                                     |                                                                        |
| Hypotension                                 |                                                    | Blood pressure                                       | Low blood pressure                                                                                                                    | Common language and expert review |                                                                  |                               | Low blood pressure                                                   |                                                                        |
| Hypertension                                |                                                    | Blood pressure                                       | Elevated blood pressure                                                                                                               | Common language and expert review |                                                                  |                               | high blood pressure                                                  |                                                                        |
| Supine hypertension                         |                                                    | Blood pressure                                       | Elevated blood pressures noted particularly when lying down                                                                           | Common language and expert review |                                                                  |                               | High blood pressure when lying down                                  |                                                                        |
| Nocturnal hypertension                      |                                                    | Blood pressure                                       | Elevated blood pressures noted overnight when attempting to sleep                                                                     | Common language and expert review |                                                                  |                               | High blood pressure overnight                                        |                                                                        |
| Swelling of extremities                     |                                                    |                                                      | Swelling due to retention of fluid commonly involving distal legs but may also involve arms                                           | Common language and expert review |                                                                  | Peripheral edema              | Swelling of arms or legs                                             |                                                                        |
| Dizziness                                   |                                                    |                                                      | Altered sense of self perceived place, may be described as either the room or the person spinning which may cause one to lose balance | Common language and expert review | lightheadedness                                                  |                               | Dizzy or spinning sensation                                          | May be indistinguishable from lightheadedness from patient perspective |
| Lightheadedness                             |                                                    |                                                      | Altered sensation that one may faint, often positionally provoked and may improve when seated from standing or lying flat             | Common language and expert review | dizziness                                                        |                               | Faintness                                                            | May be indistinguishable from dizziness from patient perspective       |
| Syncope                                     |                                                    |                                                      | Loss of consciousness, often brief with quick recovery                                                                                | Common language and expert review |                                                                  |                               | Passing out                                                          |                                                                        |
| Hyperhidrosis                               |                                                    |                                                      | Excessive sweating that may involve the entire body or specific areas such as under arms, soles, face, etc.                           | Common language and expert review | sweating secondary to panic, distress, or anxiety related events |                               | Excessive sweating                                                   |                                                                        |

| Impact Terminology Derived from Literature Review | Suggested modifications for use in future research               | Proposed Alternate Terminology for use as an Outcome (neutral) | Proposed Definition                                                                                                                                                                                                           | Definition Source                 | Excludes                                                 | Relevant Clinical Terminology   | Patient Friendly Definition                                        | Comments                                                                                                                                                                                                                                                                                                          |
|---------------------------------------------------|------------------------------------------------------------------|----------------------------------------------------------------|-------------------------------------------------------------------------------------------------------------------------------------------------------------------------------------------------------------------------------|-----------------------------------|----------------------------------------------------------|---------------------------------|--------------------------------------------------------------------|-------------------------------------------------------------------------------------------------------------------------------------------------------------------------------------------------------------------------------------------------------------------------------------------------------------------|
| <b>PHYSICAL FUNCTIONING DOMAIN</b>                |                                                                  |                                                                |                                                                                                                                                                                                                               |                                   |                                                          |                                 |                                                                    |                                                                                                                                                                                                                                                                                                                   |
| <b>MOBILITY</b>                                   |                                                                  |                                                                |                                                                                                                                                                                                                               |                                   |                                                          |                                 |                                                                    |                                                                                                                                                                                                                                                                                                                   |
| Mobility                                          |                                                                  |                                                                | Purposeful physical movement used to navigate one's environment including gross simple movements, fine complex movements, and muscle coordination                                                                             | Adopted from Giddens, 2017        |                                                          | Ambulation, dexterity           | Movement; walking                                                  |                                                                                                                                                                                                                                                                                                                   |
| Getting out of bed/chair/car                      |                                                                  |                                                                | Ability to get up from a seated position and from different heights or surfaces                                                                                                                                               | Common language and expert review |                                                          |                                 |                                                                    | Potential distinctions between these concepts may or may not be meaningful and there may be room to blend with aspects of getting to standing position.                                                                                                                                                           |
| Turning in bed                                    |                                                                  |                                                                | Ability to roll over and change positions in bed                                                                                                                                                                              | Common language and expert review |                                                          |                                 |                                                                    |                                                                                                                                                                                                                                                                                                                   |
| Standing                                          | Divide as:<br>1. Standing up<br>2. Standing for a period of time |                                                                | 1. Ability to get to standing position; and 2. Ability to maintain erect posture for a period of time                                                                                                                         | Common language and expert review |                                                          |                                 |                                                                    | Subconcept 1 could possibly be combined with "getting out of bed/chair" as the concept "Getting up from sitting or lying down."                                                                                                                                                                                   |
| Kneeling/bending                                  | Divide as:<br>1. Kneeling<br>2. Bending                          |                                                                | 1. Use of musculoskeletal system to assume a position where the body is supported by the knees; and 2. Use of the musculoskeletal system to incline the body downward from a standing position                                | Common language and expert review |                                                          |                                 |                                                                    | Combines two concepts that are not clearly related.                                                                                                                                                                                                                                                               |
| Going up or down stairs                           |                                                                  |                                                                | 1. Ability to independently walk upwards on a set of stairs or steps; and 2. Ability to independently walk downwards on a set of stairs or steps                                                                              | Common language and expert review |                                                          |                                 |                                                                    | Climbing stairs is sometimes used to assess stamina, rather than musculoskeletal function, and use is not defined in early PD literature                                                                                                                                                                          |
| Lifting/holding/carrying                          | Divide as:<br>1. Lifting<br>2. Holding<br>3. Carrying            |                                                                | 1. Ability to use musculoskeletal system to pick up and move an object to a different position; 2. Ability to keep an object in one's hand or arms; and 3. Ability to walk with an object while holding it                    | Common language and expert review |                                                          |                                 |                                                                    | Distinguishing between the three elements may be appropriate to assessing upper limb functioning in some contexts of use when precise information about specific aspects of functioning is needed.                                                                                                                |
| Gripping and opening                              | Divide as:<br>1. Gripping<br>2. Ability to open something        |                                                                | 1. Ability to grasp an item and apply tension, maximum strength generated by forearm muscles; and 2. Functional ability and muscular strength required to twist the hand or forearm and pull or lift the object to open it    | Common language and expert review |                                                          |                                 |                                                                    | Distinction may be appropriate to assessing the degree to which strength and coordination contribute to changes in functioning.                                                                                                                                                                                   |
| Handwriting                                       |                                                                  | Ability to write clearly by hand with ease                     | Use of a writing instrument, such as a pen, pencil, or marker and fine motor skills of the hand                                                                                                                               | Common language and expert review |                                                          |                                 | Penmanship                                                         |                                                                                                                                                                                                                                                                                                                   |
| Using a computer                                  |                                                                  | Ability to use a device keyboard, buttons, and/or mouse        | Ability to operate a computer                                                                                                                                                                                                 | Common language and expert review | Limitations secondary to lack of technological knowledge |                                 |                                                                    | Predominantly due to physical difficulty but may also have a cognitive component.                                                                                                                                                                                                                                 |
| Using smartphone/tablet                           |                                                                  | Ability to tap accurately on a device touchpad or screen       | Ability to use a handheld electronic device                                                                                                                                                                                   | Common language and expert review | Limitations secondary to lack of technological knowledge |                                 |                                                                    | Predominantly due to physical difficulty but may also have a cognitive component.                                                                                                                                                                                                                                 |
| Exercise/activity/sports                          |                                                                  |                                                                | Ability to engage in physical activity to improve health and fitness, or for social and leisure purposes                                                                                                                      | Common language and expert review |                                                          |                                 | Ability to be physically active, including running; hiking; biking | Distinguishing between exercise/sports as a physical vs. social impact may be appropriate in some contexts of use, and may require further specification. For example, ability to exercise may be used to assess stamina or level of fatigue, but may require specification that exercise is vigorous.            |
| <b>PHYSICAL COMFORT</b>                           |                                                                  |                                                                |                                                                                                                                                                                                                               |                                   |                                                          |                                 |                                                                    |                                                                                                                                                                                                                                                                                                                   |
| Increased physical discomfort                     |                                                                  | Physical comfort                                               | An unpleasant sensory experience; inability to achieve physical comfort, such as feeling relaxed, at ease, and able to hold a normal physical position without distress                                                       | Adopted from Giddens, 2017        | Excludes pain (symptom)                                  | Discomfort                      | Discomfort                                                         |                                                                                                                                                                                                                                                                                                                   |
| Feeling unwell                                    |                                                                  | Feeling of well-being                                          | General malaise; sensation of not feeling well or not at baseline                                                                                                                                                             | Common language and expert review | Emotional distress                                       |                                 |                                                                    |                                                                                                                                                                                                                                                                                                                   |
| Difficulty relaxing                               |                                                                  | Ability to relax                                               | State of increased tension with inability to fully resolve; Ability to reduce muscle tension, slow breathing, and calm thought process                                                                                        | Common language and expert review |                                                          |                                 |                                                                    |                                                                                                                                                                                                                                                                                                                   |
| <b>EFFORT OF LIVING</b>                           |                                                                  |                                                                |                                                                                                                                                                                                                               |                                   |                                                          |                                 |                                                                    |                                                                                                                                                                                                                                                                                                                   |
| Effort of daily living                            |                                                                  |                                                                | Energy or effort (mental or physical) expended to perform usual daily living activities                                                                                                                                       | Common language and expert review |                                                          |                                 |                                                                    |                                                                                                                                                                                                                                                                                                                   |
| Functional slowness                               |                                                                  |                                                                | Prolonged time required to complete tasks, often due to slow effortful movements and decreased motor control                                                                                                                  | Common language and expert review |                                                          | Bradykinesia                    | Takes longer to do things                                          |                                                                                                                                                                                                                                                                                                                   |
| Increased effort to do things                     |                                                                  |                                                                | Increased energy expended to perform all tasks (overlaps with categorical concept)                                                                                                                                            | Common language and expert review |                                                          |                                 | Feeling drained                                                    |                                                                                                                                                                                                                                                                                                                   |
| Having to plan around PD                          |                                                                  |                                                                | Having to coordinate schedule and alter plans to accommodate for impact of PD                                                                                                                                                 | Common language and expert review |                                                          | Motor fluctuations, ON/OFF time |                                                                    |                                                                                                                                                                                                                                                                                                                   |
| <b>SELF-CARE</b>                                  |                                                                  |                                                                |                                                                                                                                                                                                                               |                                   |                                                          |                                 |                                                                    |                                                                                                                                                                                                                                                                                                                   |
| Dressing                                          |                                                                  |                                                                | Ability to put on or take off clothing without help                                                                                                                                                                           | Common language and expert review |                                                          |                                 |                                                                    |                                                                                                                                                                                                                                                                                                                   |
| Personal hygiene                                  |                                                                  |                                                                | Tasks to maintain personal cleanliness (showering, brushing teeth, grooming, etc.) without help                                                                                                                               | Common language and expert review |                                                          |                                 |                                                                    | Distinguishing between different personal hygiene activities may be appropriate in some contexts of use or provide more precise information about change in functioning.                                                                                                                                          |
| Eating tasks                                      |                                                                  | Ability to eat and drink without help                          | Ability to feed oneself or independently consume food/beverages without help                                                                                                                                                  | Common language and expert review |                                                          | Nutrition                       |                                                                    |                                                                                                                                                                                                                                                                                                                   |
| <b>SAFETY</b>                                     |                                                                  |                                                                |                                                                                                                                                                                                                               |                                   |                                                          |                                 |                                                                    |                                                                                                                                                                                                                                                                                                                   |
| Unintentional self-injury                         |                                                                  |                                                                | Injuries to oneself that are not inflicted purposely, commonly resulting from cognitive or motor impairments                                                                                                                  | Common language and expert review | Self-harm                                                |                                 |                                                                    |                                                                                                                                                                                                                                                                                                                   |
| Tripping and falling                              | Divide as:<br>1. Tripping<br>2. Falling                          |                                                                | 1. Difficulties with foot clearance, motor control, or imbalance which may result in near or actual falls; and 2. Inability to maintain or regain balance in standing position; falling as a result of tripping, bending over | Common language and expert review | Falling out of bed                                       | Gait imbalance, freezing, falls | Unsteadiness                                                       | Additional evidence may be needed to understand what the concept really is and to what extent tripping and falling are separate. Tripping can occur without falling and falling can occur without tripping. However, "tripping-and-then-falling-because-of-tripping" could be a appropriate concept for early PD. |
| Weight change                                     |                                                                  |                                                                | Unplanned weight loss or gain that may or may not be secondary to changes in appetite                                                                                                                                         | Common language and expert review |                                                          |                                 |                                                                    |                                                                                                                                                                                                                                                                                                                   |
| <b>PSYCHOSOCIAL FUNCTIONING DOMAIN</b>            |                                                                  |                                                                |                                                                                                                                                                                                                               |                                   |                                                          |                                 |                                                                    |                                                                                                                                                                                                                                                                                                                   |
| <b>INDEPENDENCE</b>                               |                                                                  |                                                                |                                                                                                                                                                                                                               |                                   |                                                          |                                 |                                                                    |                                                                                                                                                                                                                                                                                                                   |
| Independence                                      |                                                                  |                                                                | Ability to be self-reliant and complete necessary and desirable tasks and activities without undue assistance from others                                                                                                     | Common language and expert review |                                                          |                                 | Being self-reliant                                                 |                                                                                                                                                                                                                                                                                                                   |
| Cooking/M meal prep                               |                                                                  |                                                                | Act of preparing a meal for consumption                                                                                                                                                                                       | Common language and expert review |                                                          |                                 |                                                                    |                                                                                                                                                                                                                                                                                                                   |
| Shopping                                          |                                                                  |                                                                | Act of purchasing goods from a store or online                                                                                                                                                                                | Common language and expert review |                                                          |                                 |                                                                    |                                                                                                                                                                                                                                                                                                                   |

| Impact Terminology Derived from Literature Review       | Suggested modifications for use in future research  | Proposed Alternate Terminology for use as an Outcome (neutral)  | Proposed Definition                                                                                                                                                                                                  | Definition Source                             | Excludes | Relevant Clinical Terminology           | Patient Friendly Definition      | Comments                                                                                                                                                                                                                                                                                                                                      |
|---------------------------------------------------------|-----------------------------------------------------|-----------------------------------------------------------------|----------------------------------------------------------------------------------------------------------------------------------------------------------------------------------------------------------------------|-----------------------------------------------|----------|-----------------------------------------|----------------------------------|-----------------------------------------------------------------------------------------------------------------------------------------------------------------------------------------------------------------------------------------------------------------------------------------------------------------------------------------------|
| House work/home maintenance/garden                      |                                                     | Ability to carry out one's home care tasks and responsibilities | Ability to engage in activities required for maintenance of a home (vacuuming, washing dishes, laundry, lawn care, etc.)                                                                                             | Common language and expert review             |          |                                         |                                  | The specific tasks and the associated levels of functioning and/or stamina required to complete them can vary greatly depending on living circumstances, culture, and other factors. Depending on assessment aims, it may or may not be feasible or useful to articulate specific tasks as examples or to distinguish between types of tasks. |
| Travel/Driving                                          | Divide as:<br>1. Traveling<br>2. Driving            | Ability to get around by car or other means of transportation   | 1. Act of going to different places by using a means of transportation, including being a passenger in a car; and 2. Ability to operate a motor vehicle                                                              | Common language and expert review             |          |                                         |                                  | Distinguishing between driving and other means of travel may not be appropriate to assessing independence. For example, many people do not have a car and/or do not need to drive, which affects the concept's usefulness in assessing independence in a varied population of people with PD.                                                 |
| <b>SELF-CONCEPT</b>                                     |                                                     |                                                                 |                                                                                                                                                                                                                      |                                               |          |                                         |                                  |                                                                                                                                                                                                                                                                                                                                               |
| Altered self-concept                                    |                                                     | Sense of identity                                               | Change in beliefs/perception about oneself, feeling that one's identity or essential self has changed                                                                                                                | Common language and expert review             |          |                                         | Change in self-image             |                                                                                                                                                                                                                                                                                                                                               |
| Embarrassment/self-conscious                            | Divide as:<br>1. Embarrassment<br>2. Self-conscious |                                                                 | 1. Uncomfortable feeling generated from perceiving that one's condition draws attention from others or results in unwelcome or taboo occurrences; and 2. A state of shame or worry about one's condition or symptoms | Common language and expert review             |          |                                         |                                  |                                                                                                                                                                                                                                                                                                                                               |
| Feeling stigmatized                                     |                                                     | Perceived stigma                                                | Self perception of being negatively viewed, being treated unfairly                                                                                                                                                   | Common language and expert review             |          |                                         |                                  |                                                                                                                                                                                                                                                                                                                                               |
| <b>SELF-EFFICACY</b>                                    |                                                     |                                                                 |                                                                                                                                                                                                                      |                                               |          |                                         |                                  |                                                                                                                                                                                                                                                                                                                                               |
| Decreased self-confidence                               |                                                     | Self-confidence                                                 | Diminished pride in oneself or belief in ability to be successful                                                                                                                                                    | Common language and expert review             |          |                                         |                                  |                                                                                                                                                                                                                                                                                                                                               |
| Sense of helplessness                                   |                                                     | Feeling capable                                                 | Feeling or perception that one's actions have limited ability to change or affect future outcomes                                                                                                                    | Common language and expert review             |          |                                         |                                  |                                                                                                                                                                                                                                                                                                                                               |
| Sense that PD limits what you can do                    |                                                     | Feeling unrestricted                                            | Perception that one's abilities are limited by symptoms                                                                                                                                                              | Common language and expert review             |          |                                         |                                  |                                                                                                                                                                                                                                                                                                                                               |
| <b>COPING</b>                                           |                                                     |                                                                 |                                                                                                                                                                                                                      |                                               |          |                                         |                                  |                                                                                                                                                                                                                                                                                                                                               |
| Altered coping                                          |                                                     | Coping                                                          | Decreased ability to manage stress or adverse conditions                                                                                                                                                             | Common language and expert review             |          |                                         |                                  |                                                                                                                                                                                                                                                                                                                                               |
| Living with uncertainty                                 |                                                     |                                                                 | Acknowledgement and awareness of the unpredictable and potentially undesirable nature of disease outcomes that may or may not cause anticipatory distress                                                            | Common language and expert review             |          |                                         |                                  |                                                                                                                                                                                                                                                                                                                                               |
| Preoccupation with disease                              |                                                     |                                                                 | Intrusive thoughts or worry about the impact of disease burdens/progression                                                                                                                                          | Common language and expert review             |          |                                         |                                  |                                                                                                                                                                                                                                                                                                                                               |
| Increased fear                                          |                                                     | Fear                                                            | Unpleasant strong emotion and increased autonomic activity caused by anticipation or awareness of danger                                                                                                             | Adopted from Merriam-Webster Dictionary, 2024 |          |                                         |                                  |                                                                                                                                                                                                                                                                                                                                               |
| Fear of falling                                         |                                                     |                                                                 | Anticipation and concern about the act of falling and its consequences                                                                                                                                               | Common language and expert review             |          |                                         |                                  |                                                                                                                                                                                                                                                                                                                                               |
| Fear of future                                          |                                                     |                                                                 | Anticipation and dread about future or upcoming events or outcomes                                                                                                                                                   | Common language and expert review             |          |                                         |                                  |                                                                                                                                                                                                                                                                                                                                               |
| Avoidance                                               |                                                     |                                                                 | Behaviors that limit social interaction or pursuit of activities                                                                                                                                                     | Common language and expert review             |          |                                         |                                  |                                                                                                                                                                                                                                                                                                                                               |
| Denial                                                  |                                                     |                                                                 | Refusal to accept diagnosis or reality of one's condition                                                                                                                                                            | Common language and expert review             |          |                                         |                                  |                                                                                                                                                                                                                                                                                                                                               |
| Concealing diagnosis                                    |                                                     |                                                                 | Choosing not to disclose one's diagnosis                                                                                                                                                                             | Common language and expert review             |          |                                         |                                  |                                                                                                                                                                                                                                                                                                                                               |
| Annoyance/bothered                                      | Divide as:<br>1. Annoyance<br>2. Bothered           |                                                                 | Emotional state of feeling annoyed, irritated, or bothered about something                                                                                                                                           | Common language and expert review             |          |                                         |                                  | Further evidence may be needed to determine whether distinguishing between these two concepts is feasible or useful.                                                                                                                                                                                                                          |
| Frustration/Anger                                       | Divide as:<br>1. Frustration<br>2. Anger            |                                                                 | Emotional state of displeasure or animosity towards something                                                                                                                                                        | Common language and expert review             |          |                                         |                                  | Further evidence may be needed to determine whether distinguishing between these two concepts is feasible or useful.                                                                                                                                                                                                                          |
| Stress, distress, overwhelmed                           |                                                     |                                                                 | Perceived emotional feeling and hormonal reaction to a life event such as adversity, hardship, or illness where resources and abilities for management are available, exceeded, or exhausted                         | Adopted from Giddens, 2017                    |          |                                         |                                  | Further evidence may be needed to determine whether distinguishing between these three concepts is feasible or useful.                                                                                                                                                                                                                        |
| Finding ways to compensate                              |                                                     | Ability to cope                                                 | Actions that compensate for the impact of one's symptoms or diagnosis                                                                                                                                                | Common language and expert review             |          |                                         |                                  |                                                                                                                                                                                                                                                                                                                                               |
| Making positive changes to take control of disease      |                                                     | Adaptation to and management of disease                         | Adaptive behaviors to promote self empowerment and address uncertainty                                                                                                                                               | Common language and expert review             |          | Empowerment                             |                                  |                                                                                                                                                                                                                                                                                                                                               |
| <b>INTERPERSONAL INTERACTIONS</b>                       |                                                     |                                                                 |                                                                                                                                                                                                                      |                                               |          |                                         |                                  |                                                                                                                                                                                                                                                                                                                                               |
| Interpersonal interactions (all)                        |                                                     | Ability to engage in desired level of social activity           | Social involvement or engagement with others                                                                                                                                                                         | Common language and expert review             |          |                                         |                                  |                                                                                                                                                                                                                                                                                                                                               |
| Relationships with others (friends, family, colleagues) |                                                     | Satisfaction with family and social life                        | Perception of major roles and responsibilities in current life situation                                                                                                                                             | Common language and expert review             |          |                                         |                                  |                                                                                                                                                                                                                                                                                                                                               |
| Perceptions and reactions of other people               |                                                     |                                                                 | Views and feelings about how other people perceive and react to one's symptoms, impairments, and needs or requirements                                                                                               | Common language and expert review             |          |                                         |                                  | Term may benefit by clarification and may be related to feeling stigmatized                                                                                                                                                                                                                                                                   |
| Communication                                           |                                                     |                                                                 | Ability to express thoughts verbally or by writing or typing, and to understand spoken or written language                                                                                                           | Common language and expert review             |          | Expressive language, receptive language |                                  |                                                                                                                                                                                                                                                                                                                                               |
| Loneliness/isolation                                    | Divide as:<br>1. Loneliness<br>2. Isolation         |                                                                 | 1. Feeling alone; emotional state that can occur in the presence of others as well as by oneself; and 2. Limited ability to go out and engage with others; keeping oneself apart from others                         | Common language and expert review             |          |                                         |                                  |                                                                                                                                                                                                                                                                                                                                               |
| <b>ROLES AND RESPONSIBILITIES</b>                       |                                                     |                                                                 |                                                                                                                                                                                                                      |                                               |          |                                         |                                  |                                                                                                                                                                                                                                                                                                                                               |
| Taking care of family                                   |                                                     |                                                                 | Ability to provide for family, may include physical/emotional means                                                                                                                                                  | Common language and expert review             |          |                                         |                                  |                                                                                                                                                                                                                                                                                                                                               |
| Taking care of pets                                     |                                                     |                                                                 | Ability to provide for pets, may include feeding, elimination, exercise, veterinary care                                                                                                                             | Common language and expert review             |          |                                         | Pet care                         |                                                                                                                                                                                                                                                                                                                                               |
| Impact on job/career/profession                         |                                                     |                                                                 | Influence symptoms/disease has on career aspirations or ability to achieve desired professional goals, as well as ability to attend work and complete work-related tasks accurately and on time                      | Common language and expert review             |          |                                         |                                  |                                                                                                                                                                                                                                                                                                                                               |
| Financial impact/paying bills                           |                                                     |                                                                 | Economic strain or effect on affording costs of living                                                                                                                                                               | Common language and expert review             |          |                                         | Worrying about money or finances |                                                                                                                                                                                                                                                                                                                                               |
| <b>IMPORTANT ACTIVITIES</b>                             |                                                     |                                                                 |                                                                                                                                                                                                                      |                                               |          |                                         |                                  |                                                                                                                                                                                                                                                                                                                                               |
| Pleasurable activities                                  |                                                     |                                                                 | Ability to engage in activities that bring enjoyment, may include recreational activities or tasks that provide greater sense of fulfillment                                                                         | Common language and expert review             |          |                                         |                                  |                                                                                                                                                                                                                                                                                                                                               |
| Loss of things you enjoy                                |                                                     |                                                                 | Sense of loss due to inability to engage in desired enjoyable activities                                                                                                                                             | Common language and expert review             |          | Apathy                                  |                                  |                                                                                                                                                                                                                                                                                                                                               |

| Impact Terminology Derived from Literature Review                                                                             | Suggested modifications for use in future research | Proposed Alternate Terminology for use as an Outcome (neutral) | Proposed Definition                                                                                                   | Definition Source                 | Excludes | Relevant Clinical Terminology  | Patient Friendly Definition | Comments |
|-------------------------------------------------------------------------------------------------------------------------------|----------------------------------------------------|----------------------------------------------------------------|-----------------------------------------------------------------------------------------------------------------------|-----------------------------------|----------|--------------------------------|-----------------------------|----------|
| Social life                                                                                                                   |                                                    |                                                                | Social interactions with others spent doing enjoyable activities                                                      | Common language and expert review |          | Socialization                  |                             |          |
| Playing musical instrument                                                                                                    |                                                    |                                                                | Ability to position oneself to hold or operate a musical instrument                                                   | Common language and expert review |          |                                |                             |          |
| Spiritual and Religious activities                                                                                            |                                                    |                                                                | Ability to participate in an organized or independent spiritual or religious life                                     | Common language and expert review |          |                                |                             |          |
| Hobbies/leisure activities                                                                                                    |                                                    |                                                                | Ability to engage in desired hobby or leisure activities                                                              | Common language and expert review |          |                                |                             |          |
| CONTEXTUAL FACTORS                                                                                                            |                                                    |                                                                |                                                                                                                       |                                   |          |                                |                             |          |
| Symmetrical symptom onset                                                                                                     |                                                    |                                                                | Motor deficits that affect both sides of the body at beginning of disease or perceived awareness of symptoms          | Common language and expert review |          |                                |                             |          |
| Most dominant/obvious issues                                                                                                  |                                                    |                                                                | Most prevalent or dominant symptom(s) that causes the greatest impact on daily life, health, and wellbeing            | Common language and expert review |          |                                |                             |          |
| Frequency and severity of symptoms                                                                                            |                                                    |                                                                | Frequency refers to the number of times a symptom occurs and severity refers to how severe a symptoms is when present | Common language and expert review |          |                                |                             |          |
| Medication dose failure/delayed on                                                                                            |                                                    |                                                                | Limited efficacy following medication dosing either due to delay or limit in peak benefit                             | Common language and expert review |          |                                |                             |          |
| Nocturnal motor symptoms                                                                                                      |                                                    |                                                                | Motor symptoms that occur primarily at night often while trying to sleep                                              | Common language and expert review |          |                                |                             |          |
| Motor fluctuations                                                                                                            |                                                    |                                                                | Changes in motor performance often in context of varied drug absorption/availability of dopamine                      | Common language and expert review |          | dyskinesias                    |                             |          |
| Energy intake                                                                                                                 |                                                    |                                                                | Total daily consumption of nutritional caloric intake                                                                 | Common language and expert review |          | Nutrition                      | Eating                      |          |
| "Off" periods                                                                                                                 |                                                    |                                                                | Moments of worsened motor symptoms resulting in functional limitation                                                 | Common language and expert review |          | Wearing off syndrome           |                             |          |
| Medication side effects                                                                                                       |                                                    |                                                                | Unintended adverse effect occurring at a normal dose                                                                  | Common language and expert review |          | Pharmacological adverse effect |                             |          |
| References:                                                                                                                   |                                                    |                                                                |                                                                                                                       |                                   |          |                                |                             |          |
| Giddens, J.F. (2017). <i>Concepts for nursing practice</i> (2nd Ed.). Elsevier                                                |                                                    |                                                                |                                                                                                                       |                                   |          |                                |                             |          |
| Merriam-Webster (2024). <a href="https://www.merriam-webster.com/dictionary/">https://www.merriam-webster.com/dictionary/</a> |                                                    |                                                                |                                                                                                                       |                                   |          |                                |                             |          |
|                                                                                                                               |                                                    |                                                                |                                                                                                                       |                                   |          |                                |                             |          |
