# Supplementary material for: A consensus conceptual model of meaningful symptoms and functional impacts in early Parkinson’s Disease
Source: Research Square preprint supplement (doi:10.21203/rs.3.rs-4377805/v1), 2024-07-03
Supplement: Supplementary file 17 [file f53d43d69b6b78d802a14627.pdf]

# AUTONOMIC NERVOUS SYSTEM DOMAIN (SYMPTOMS)

| Category/Concept                   | Coherence in Measurement & Classification |                                                                                    | Adequacy of Data |                  | Relevance of Concept |                   |         |
|------------------------------------|-------------------------------------------|------------------------------------------------------------------------------------|------------------|------------------|----------------------|-------------------|---------|
|                                    | Concerns                                  | Explanation                                                                        | Tier 1 Grade     | Tier 2 & 3 Level | Bothersome mean %    | Prevalence mean % | [Range] |
| CARDIOVASCULAR SYMPTOMS            |                                           | Proposed concept category                                                          | X                | 4                | -                    | 28%               | -       |
| Blood pressure regulation          | UA                                        | Limited evidence; no disconfirming evidence                                        | D                | x                | -                    | 5%                | -       |
| Hypotension                        | Moderate                                  | Thresholds not provided in sources                                                 | D                | 4                |                      |                   |         |
| Orthostatic hypotension            | Moderate                                  | Contextual variation of hypotension; Not patient oriented term                     | D                | 4                | -                    | -                 | -       |
| Orthostatic symptoms               | Moderate                                  | Presumed symptoms; unclear definition in sources; Not patient oriented term        | X                | 4                | -                    | 18%               | [16-19% |
| Hypertension                       | Moderate                                  | Thresholds not provided in sources; no evidence in early PD <3YSD                  | X                | x                | -                    | -                 | -       |
| Supine hypertension                | UA                                        | Contextual variation of hypertension; Not patient oriented term                    | X                | x                | -                    | -                 | -       |
| Nocturnal hypertension             | UA                                        | Contextual variation of hypertension; Not patient oriented term                    | X                | x                | -                    | -                 | -       |
| Change in nocturnal BP             | UA                                        | Contextual variation of hypertension; Not patient oriented term                    | X                | x                | -                    | -                 | -       |
| Lower extremity swelling           | Moderate                                  | Unclear if correctly categorized; One Tier 1 study disconfirming in early PD <3YSD | D -              | 4                | -                    | 12%               | [9-14%  |
| LIGHTHEADED, DIZZY, FAINTING       |                                           | Proposed concept category                                                          |                  |                  |                      |                   |         |
| Dizziness                          | Moderate                                  | May overlap with lightheadedness from patient perspective                          | B                | 4                | 3%                   | 16%               | [13-23% |
| Lightheadedness                    | Moderate                                  | May overlap with dizziness from patient perspective                                | A+               | 3                | 3%                   | 20%               | [3-31%  |
| Lightheadedness with long standing | UA                                        | Contextual variation of lightheadedness                                            | X                | 4                | -                    | 14%               | [12-15% |
| Fainting/Syncope                   | UA                                        | Limited evidence; no disconfirming evidence                                        | D                | 4                | -                    | 2%                | [1-3%   |
| SWEATING/HYPERHIDROSIS             | Moderate                                  | One Tier 1 study disconfirming presence in early PD <3 YSD                         | D -              | 3                | 1%                   | 13%               | [3-28%  |
| AUTONOMIC SYMPTOMS NOS             | Severe                                    | Comprises many diverse concepts; unclear what is being measured                    | X                | 4                | -                    | 71%               | -       |

**Notes.** PD= Parkinson's disease; UA=Unable to assess due to limited data; YSD=Years since diagnosis of Parkinson's disease; **Tier 1 Grade** A+=100% (Green), A=75-99% (Green), B=50-74% (Yellow), C=25-49% (Orange), D=1-24% (Gray), X=No studies supporting presence in early PD (Black); **Tier 2 & 3 Level** 1=75-100% (Green), 2=50-74% (Yellow), 3=25-49% (Orange), 4=1-24% (Gray), x=No Tier 2 or 3 studies supporting presence in early PD (Black). Minus sign "-" in Grade or Level indicates presence of disconfirming evidence. Color coding is used for visual identification of concepts with greater supporting evidence in Grade and Level. For bothersomeness and prevalence, darker colors indicate higher average frequency in studies reporting.
